# Supplementary material for: The Association Between White Blood Cell Count and Relative Risk of Non-Small Cell Lung Cancer
Source: Research Square preprint supplement (doi:10.21203/rs.3.rs-5773221/v1), 2025-04-21
Supplement: Supplementary file 1 [file c05f75ef99f72792e4ae0df2.xlsx]

## Sheet: exclude
rsid	trait	chr	pos	p	OR or BETA	95% CI (TEXT)	MAPPED_GENE	PUBMEDID	FIRST AUTHOR	JOURNAL	Sample	STUDY ACCESSION	STUDY
rs1738074	Multiple sclerosis	6	159044945	4e-07	1.15	TAGAP, TAGAP-AS1	22190364	Patsopoulos NA	Ann Neurol	5,545 European ancestry cases, 12,153 European ancestry controls	5,545 European ancestry cases, 12,153 European ancestry controls	GCST001341	Genome-wide meta-analysis identifies novel multiple sclerosis susceptibility loci.
rs12203592	Black vs. blond hair color	6	396321	7e-127	0.35	IRF4	18483556	Han J	PLoS Genet	2,287 European ancestry female individuals	2,287 European ancestry female individuals	GCST000190	A genome-wide association study identifies novel alleles associated with hair color and skin pigmentation.
rs610604	Psoriasis	6	137878280	7e-07	1.22	TNFAIP3	20953190	Strange A	Nat Genet	2,178 European ancestry cases, 5,175 European ancestry controls	2,178 European ancestry cases, 5,175 European ancestry controls	GCST000833	A genome-wide association study identifies new psoriasis susceptibility loci and an interaction between HLA-C and ERAP1.
rs1260326	Cardiovascular disease risk factors	2	27508073	2e-08	0.082	GCKR	21943158	Middelberg RP	BMC Med Genet	11,683 European ancestry individuals	11,683 European ancestry individuals	GCST001247	Genetic variants in LPL, OASL and TOMM40/APOE-C1-C2-C4 genes are associated with multiple cardiovascular-related traits.
rs174548	Hematology traits	11	61803876	4e-08	0.017	FADS2, FADS1	23303382	Hong KW	J Hum Genet	4,637 East Asian ancestry individuals	4,637 East Asian ancestry individuals	GCST001813	Genome-wide association study of serum albumin:globulin ratio in Korean populations.
rs1990760	Immunoglobulin A	2	162267541	7e-10	1.49	IFIH1	20694011	Ferreira RC	Nat Genet	430 European ancestry cases, 1,090 European ancestry controls	430 European ancestry cases, 1,090 European ancestry controls	GCST000763	Association of IFIH1 and other autoimmunity risk alleles with selective IgA deficiency.
rs1042725	Height	12	65964567	3e-18	0.05	HMGA2	18391952	Weedon MN	Nat Genet	13,665 European ancestry individuals	13,665 European ancestry individuals	GCST000174	Genome-wide association analysis identifies 20 loci that influence adult height.
rs3184504	Type 1 diabetes	12	111446804	3e-27	NA	ATXN2, SH2B3	19430480	Barrett JC	Nat Genet	7,514 European ancestry cases, 9,045 European ancestry controls	7,514 European ancestry cases, 9,045 European ancestry controls	GCST000392	Genome-wide association study and meta-analysis find that over 40 loci affect risk of type 1 diabetes.
rs2476601	Type 1 diabetes	1	113834946	9e-85	NA	PTPN22, AP4B1-AS1	19430480	Barrett JC	Nat Genet	7,514 European ancestry cases, 9,045 European ancestry controls	7,514 European ancestry cases, 9,045 European ancestry controls	GCST000392	Genome-wide association study and meta-analysis find that over 40 loci affect risk of type 1 diabetes.
rs2954021	Liver enzyme levels (alanine transaminase)	8	125469835	5e-09	1.6	TRIB1AL	22001757	Chambers JC	Nat Genet	Up to 52,350 European ancestry individuals, up to 8,739 Indian Asian ancestry individuals	Up to 52,350 European ancestry individuals, up to 8,739 Indian Asian ancestry individuals	GCST001275	Genome-wide association study identifies loci influencing concentrations of liver enzymes in plasma.
rs729761	Urate levels	6	43836834	8e-16	0.047	VEGFA - LINC02537	23263486	Kottgen A	Nat Genet	49,825 European ancestry males, 60,522 European ancestry females	49,825 European ancestry males, 60,522 European ancestry females	GCST001791	Genome-wide association analyses identify 18 new loci associated with serum urate concentrations.
rs603424	Palmitic acid (16:0) levels	10	100315722	2e-07	0.1891	PKD2L1	23362303	Wu JH	Circ Cardiovasc Genet	8,961 European ancestry individuals	8,961 European ancestry individuals	GCST001838	Genome-wide association study identifies novel loci associated with concentrations of four plasma phospholipid fatty acids in the de novo lipogenesis pathway: results from the Cohorts for Heart and Aging Research in Genomic Epidemiology (CHARGE) consortium.
rs364663	Menarche (age at onset)	6	104995314	5e-07	0.089	LIN28B	23667675	Tanikawa C	PLoS One	15,495 Japanese ancestry females	15,495 Japanese ancestry females	GCST002013	Genome wide association study of age at menarche in the Japanese population.
rs2304130	Triglycerides	19	19678719	4e-08	0.07	ZNF101	20864672	Waterworth DM	Arterioscler Thromb Vasc Biol	up to 17,723 European ancestry individuals	up to 17,723 European ancestry individuals	GCST000809	Genetic variants influencing circulating lipid levels and risk of coronary artery disease.
rs7679673	Prostate cancer	4	105140377	3e-14	1.1	RNU6-351P - TET2	19767753	Eeles RA	Nat Genet	1,854 European ancestry cases, 1,894 European ancestry controls	1,854 European ancestry cases, 1,894 European ancestry controls	GCST000488	Identification of seven new prostate cancer susceptibility loci through a genome-wide association study.
rs857721	Other erythrocyte phenotypes	1	158642758	1e-10	0	SPTA1	19862010	Ganesh SK	Nat Genet	24,167 European ancestry individuals	24,167 European ancestry individuals	GCST000500	Multiple loci influence erythrocyte phenotypes in the CHARGE Consortium.
rs7776054	Mean corpuscular hemoglobin	6	135097778	7e-69	0.01	HBS1L	19862010	Ganesh SK	Nat Genet	24,167 European ancestry individuals	24,167 European ancestry individuals	GCST000504	Multiple loci influence erythrocyte phenotypes in the CHARGE Consortium.
rs613872	Fuchs's corneal dystrophy	18	55543071	1e-18	5.47	TCF4	20825314	Baratz KH	N Engl J Med	130 European ancestry cases, 260 European ancestry controls	130 European ancestry cases, 260 European ancestry controls	GCST000790	E2-2 protein and Fuchs's corneal dystrophy.
rs1800961	HDL cholesterol	20	44413724	1e-15	1.88	HNF4A	20686565	Teslovich TM	Nature	99,900 European ancestry individuals	99,900 European ancestry individuals	GCST000755	Biological, clinical and population relevance of 95 loci for blood lipids.
rs11556924	Coronary heart disease	7	130023656	9e-18	1.09	ZC3HC1, UBE2H-DT	21378990	Schunkert H	Nat Genet	22,233 European ancestry cases, 64,762 European ancestry controls	22,233 European ancestry cases, 64,762 European ancestry controls	GCST000998	Large-scale association analysis identifies 13 new susceptibility loci for coronary artery disease.
rs6734238	C-reactive protein levels	2	113083453	2e-17	0.05	IL1F10 - RNU6-1180P	21300955	Dehghan A	Circulation	63,678 European ancestry individuals 1,792 Erasmus Rucphen individuals, 715 Orcadian individuals	63,678 European ancestry individuals 1,792 Erasmus Rucphen individuals, 715 Orcadian individuals	GCST000965	Meta-analysis of genome-wide association studies in >80 000 subjects identifies multiple loci for C-reactive protein levels.
rs11829373	Periodontitis (Mean PAL)	12	92593432	7e-06	0.08	MTCH2P2 - PLEKHG7	24024966	Teumer A	J Clin Periodontol	up to 4,032 European ancestry individuals	up to 4,032 European ancestry individuals	GCST002127	Genome-wide association study of chronic periodontitis in a general German population.
rs28834970	Alzheimer's disease (late onset)	8	27337604	7e-14	1.1	PTK2B	24162737	Lambert JC	Nat Genet	17,008 European ancestry cases, 37,154 European ancestry controls	17,008 European ancestry cases, 37,154 European ancestry controls	GCST002245	Meta-analysis of 74,046 individuals identifies 11 new susceptibility loci for Alzheimer's disease.
rs4794820	Asthma	17	39933091	1e-08	1.33	LRRC3C	22561531	Wan YI	Thorax	933 European ancestry cases, 3,346 European ancestry controls	933 European ancestry cases, 3,346 European ancestry controls	GCST001508	Genome-wide association study to identify genetic determinants of severe asthma.
rs10498635	Paget's disease	14	92636964	3e-11	1.44	RIN3	21623375	Albagha OM	Nat Genet	741 European ancestry cases, 2,699 European ancestry controls	741 European ancestry cases, 2,699 European ancestry controls	GCST001086	Genome-wide association identifies three new susceptibility loci for Paget's disease of bone.
rs3811444	Platelet count	1	247876149	6e-09	3.346	TRIM58	22139419	Gieger C	Nature	38,891 European ancestry individuals, 1,661 Val Borbera (founder/genetic isolate) individuals, 521 Carlantino (founder/genetic isolate) individuals, 1,198 Friuli Venezia Giulia (founder/genetic isolate) individuals, 1,213 South Tyrolean (founder/genetic isolate) individuals, 890 Sorbian (founder/genetic isolate) individuals, 4,292 Sardinian (founder/genetic isolate) individuals	38,891 European ancestry individuals, 1,661 Val Borbera (founder/genetic isolate) individuals, 521 Carlantino (founder/genetic isolate) individuals, 1,198 Friuli Venezia Giulia (founder/genetic isolate) individuals, 1,213 South Tyrolean (founder/genetic isolate) individuals, 890 Sorbian (founder/genetic isolate) individuals, 4,292 Sardinian (founder/genetic isolate) individuals	GCST001337	New gene functions in megakaryopoiesis and platelet formation.
rs2024092	Crohn's disease	19	1124032	8e-22	1.156	SBNO2	23128233	Jostins L	Nature	Up to 12,924 European ancestry cases, up to 21,442 European ancestry controls	Up to 12,924 European ancestry cases, up to 21,442 European ancestry controls	GCST001729	Host-microbe interactions have shaped the genetic architecture of inflammatory bowel disease.
rs4909945	Migraine	11	10652192	2e-07	1.06	IRAG1	23793025	Anttila V	Nat Genet	23,285 European ancestry cases, 95,425 European ancestry controls	23,285 European ancestry cases, 95,425 European ancestry controls	GCST002081	Genome-wide meta-analysis identifies new susceptibility loci for migraine.
rs7776857	Metabolite levels	7	22715149	6e-06	0.178756	STEAP1B	23823483	Rhee EP	Cell Metab	2,076 European ancestry individuals	2,076 European ancestry individuals	GCST009391	A genome-wide association study of the human metabolome in a community-based cohort.
rs1047891	HDL cholesterol	2	210675783	9e-10	0.027	CPS1	24097068	Willer CJ	Nat Genet	94,595 European ancestry individuals	94,595 European ancestry individuals	GCST002223	Discovery and refinement of loci associated with lipid levels.
rs6732565	Rheumatoid arthritis	2	110850255	9e-09	1.1	ACOXL	24390342	Okada Y	Nature	up to 14,361 European ancestry cases, up to 42,923 European ancestry controls, up to 4,873 East Asian ancestry cases, up to 17,642 East Asian ancestry controls	up to 14,361 European ancestry cases, up to 42,923 European ancestry controls, up to 4,873 East Asian ancestry cases, up to 17,642 East Asian ancestry controls	GCST002318	Genetics of rheumatoid arthritis contributes to biology and drug discovery.
rs11768083	Metabolite levels	7	48095122	6e-08	0.205893	UPP1	23823483	Rhee EP	Cell Metab	2,076 European ancestry individuals	2,076 European ancestry individuals	GCST009391	A genome-wide association study of the human metabolome in a community-based cohort.
rs12487658	Morning vs. evening chronotype	3	71479792	7e-06	NA	FOXP1	26835600	Hu Y	Nat Commun	38,937 European ancestry morning chronotype individuals, 50,346 European ancestry evening chronotype individuals	38,937 European ancestry morning chronotype individuals, 50,346 European ancestry evening chronotype individuals	GCST003429	GWAS of 89,283 individuals identifies genetic variants associated with self-reporting of being a morning person.
rs56823429	HDL cholesterol	16	81500184	2e-08	0.037	CMIP	25961943	Surakka I	Nat Genet	up to 62,166 European ancestry individuals	up to 62,166 European ancestry individuals	GCST002899	The impact of low-frequency and rare variants on lipid levels.
rs4782371	Vascular endothelial growth factor levels	16	88502423	1e-09	0.07	ZFPM1	26910538	Choi SH	PLoS Genet	9541 European ancestry individuals, 1,115 Cilento (founder/genetic isolated) individuals, 897 Ogliastran (founder/genetic isolated) individuals, 1,759 Val Borbera (founder/genetic isolated) individuals	9541 European ancestry individuals, 1,115 Cilento (founder/genetic isolated) individuals, 897 Ogliastran (founder/genetic isolated) individuals, 1,759 Val Borbera (founder/genetic isolated) individuals	GCST003403	Six Novel Loci Associated with Circulating VEGF Levels Identified by a Meta-analysis of Genome-Wide Association Studies.
rs11064881	Ulcerative colitis	12	119709120	2e-07	1.12735	CIT	26192919	Liu JZ	Nat Genet	6,968 European ancestry cases, 20,464 European ancestry controls	6,968 European ancestry cases, 20,464 European ancestry controls	GCST003045	Association analyses identify 38 susceptibility loci for inflammatory bowel disease and highlight shared genetic risk across populations.
rs7705526	Plateletcrit	5	1285859	2e-41	0.0536595	TERT	27863252	Astle WJ	Cell	164,339 European ancestry individuals	164,339 European ancestry individuals	GCST004607	The Allelic Landscape of Human Blood Cell Trait Variation and Links to Common Complex Disease.
rs1822534	Plateletcrit	3	12225304	2e-33	0.0451014	SYN2 - GSTM5P1	27863252	Astle WJ	Cell	164,339 European ancestry individuals	164,339 European ancestry individuals	GCST004607	The Allelic Landscape of Human Blood Cell Trait Variation and Links to Common Complex Disease.
rs10751450	Mean corpuscular hemoglobin concentration	1	203681817	5e-59	0.0935208	ATP2B4	27863252	Astle WJ	Cell	172,851 European ancestry individuals	172,851 European ancestry individuals	GCST004605	The Allelic Landscape of Human Blood Cell Trait Variation and Links to Common Complex Disease.
rs11735662	Mean corpuscular hemoglobin concentration	4	144104973	2e-18	0.0833989	GUSBP5, GUSBP5	27863252	Astle WJ	Cell	172,851 European ancestry individuals	172,851 European ancestry individuals	GCST004605	The Allelic Landscape of Human Blood Cell Trait Variation and Links to Common Complex Disease.
rs112682076	Hematocrit	1	10297748	7e-09	0.0986954	KIF1B	27863252	Astle WJ	Cell	173,039 European ancestry individuals	173,039 European ancestry individuals	GCST004604	The Allelic Landscape of Human Blood Cell Trait Variation and Links to Common Complex Disease.
rs10048745	Plateletcrit	2	68735005	5e-21	0.0402025	ARHGAP25	27863252	Astle WJ	Cell	164,339 European ancestry individuals	164,339 European ancestry individuals	GCST004607	The Allelic Landscape of Human Blood Cell Trait Variation and Links to Common Complex Disease.
rs3118471	Chronic inflammatory diseases (ankylosing spondylitis, Crohn's disease, psoriasis, primary sclerosing cholangitis, ulcerative colitis) (pleiotropy)	10	6060794	4e-13	NA	IL2RA	26974007	Ellinghaus D	Nat Genet	8,726 European ancestry ankylosing spondylitis cases, 19,085 European ancestry Crohn’s disease cases, 6,530 European ancestry psoriasis cases, 3,408 European ancestry primary sclerosing cholangitis cases, 14,513 European ancestry ulcerative colitis cases, 34,213 European ancestry controls	8,726 European ancestry ankylosing spondylitis cases, 19,085 European ancestry Crohn’s disease cases, 6,530 European ancestry psoriasis cases, 3,408 European ancestry primary sclerosing cholangitis cases, 14,513 European ancestry ulcerative colitis cases, 34,213 European ancestry controls	GCST005537	Analysis of five chronic inflammatory diseases identifies 27 new associations and highlights disease-specific patterns at shared loci.
rs17010957	Systolic blood pressure	4	85798012	2e-09	0.498	ARHGAP24	27618452	Ehret GB	Nat Genet	up to 201,529 European ancestry individuals	up to 201,529 European ancestry individuals	GCST006259	The genetics of blood pressure regulation and its target organs from association studies in 342,415 individuals.
rs718515	Mean corpuscular volume	18	46276334	7e-72	0.064128	ARK2N - ARK2C	27863252	Astle WJ	Cell	172,433 European ancestry individuals	172,433 European ancestry individuals	GCST004602	The Allelic Landscape of Human Blood Cell Trait Variation and Links to Common Complex Disease.
rs13289095	Plateletcrit	9	128704210	6e-11	0.0339191	PKN3	27863252	Astle WJ	Cell	164,339 European ancestry individuals	164,339 European ancestry individuals	GCST004607	The Allelic Landscape of Human Blood Cell Trait Variation and Links to Common Complex Disease.
rs2026029	Chronic inflammatory diseases (ankylosing spondylitis, Crohn's disease, psoriasis, primary sclerosing cholangitis, ulcerative colitis) (pleiotropy)	13	49021195	1e-07	NA	FNDC3A	26974007	Ellinghaus D	Nat Genet	8,726 European ancestry ankylosing spondylitis cases, 19,085 European ancestry Crohn’s disease cases, 6,530 European ancestry psoriasis cases, 3,408 European ancestry primary sclerosing cholangitis cases, 14,513 European ancestry ulcerative colitis cases, 34,213 European ancestry controls	8,726 European ancestry ankylosing spondylitis cases, 19,085 European ancestry Crohn’s disease cases, 6,530 European ancestry psoriasis cases, 3,408 European ancestry primary sclerosing cholangitis cases, 14,513 European ancestry ulcerative colitis cases, 34,213 European ancestry controls	GCST005537	Analysis of five chronic inflammatory diseases identifies 27 new associations and highlights disease-specific patterns at shared loci.
rs11574938	Chronic inflammatory diseases (ankylosing spondylitis, Crohn's disease, psoriasis, primary sclerosing cholangitis, ulcerative colitis) (pleiotropy)	16	30474072	5e-14	NA	ITGAL	26974007	Ellinghaus D	Nat Genet	8,726 European ancestry ankylosing spondylitis cases, 19,085 European ancestry Crohn’s disease cases, 6,530 European ancestry psoriasis cases, 3,408 European ancestry primary sclerosing cholangitis cases, 14,513 European ancestry ulcerative colitis cases, 34,213 European ancestry controls	8,726 European ancestry ankylosing spondylitis cases, 19,085 European ancestry Crohn’s disease cases, 6,530 European ancestry psoriasis cases, 3,408 European ancestry primary sclerosing cholangitis cases, 14,513 European ancestry ulcerative colitis cases, 34,213 European ancestry controls	GCST005537	Analysis of five chronic inflammatory diseases identifies 27 new associations and highlights disease-specific patterns at shared loci.
rs4681767	Attention function in attention deficit hyperactive disorder	3	56725664	8e-06	0.18	TASOR - ARHGEF3	26174813	Alemany S	Am J Med Genet B Neuropsychiatr Genet	479 European ancestry adult cases	479 European ancestry adult cases	GCST003025	New suggestive genetic loci and biological pathways for attention function in adult attention-deficit/hyperactivity disorder.
rs1032295	Post bronchodilator FEV1/FVC ratio	4	144513432	3e-12	0.014	GUSBP5 - KRT18P51	26634245	Lutz SM	BMC Genet	10,094 European ancestry current and former smoker individuals, 3,260 African American current and former smoker individuals, 178 current and former smoker individuals	10,094 European ancestry current and former smoker individuals, 3,260 African American current and former smoker individuals, 178 current and former smoker individuals	GCST003264	A genome-wide association study identifies risk loci for spirometric measures among smokers of European and African ancestry.
rs2710804	Fibrinogen levels	7	36044919	3e-09	0.0055	SEPTIN7P3 - MARK2P13	26561523	de Vries PS	Hum Mol Genet	120,246 European ancestry individuals	120,246 European ancestry individuals	GCST003194	A meta-analysis of 120 246 individuals identifies 18 new loci for fibrinogen concentration.
rs1985157	Granulocyte percentage of myeloid white cells	19	18402784	7e-30	0.0411501	LRRC25 - SSBP4	27863252	Astle WJ	Cell	169,545 European ancestry individuals	169,545 European ancestry individuals	GCST004608	The Allelic Landscape of Human Blood Cell Trait Variation and Links to Common Complex Disease.
rs4760	Granulocyte percentage of myeloid white cells	19	43648948	1e-37	0.0629713	PLAUR	27863252	Astle WJ	Cell	169,545 European ancestry individuals	169,545 European ancestry individuals	GCST004608	The Allelic Landscape of Human Blood Cell Trait Variation and Links to Common Complex Disease.
rs76428106	Granulocyte percentage of myeloid white cells	13	28029870	2e-136	0.388883	FLT3	27863252	Astle WJ	Cell	169,545 European ancestry individuals	169,545 European ancestry individuals	GCST004608	The Allelic Landscape of Human Blood Cell Trait Variation and Links to Common Complex Disease.
rs12927351	Granulocyte percentage of myeloid white cells	16	74562720	2e-15	0.0355192	GLG1	27863252	Astle WJ	Cell	169,545 European ancestry individuals	169,545 European ancestry individuals	GCST004608	The Allelic Landscape of Human Blood Cell Trait Variation and Links to Common Complex Disease.
rs9977672	Chronic inflammatory diseases (ankylosing spondylitis, Crohn's disease, psoriasis, primary sclerosing cholangitis, ulcerative colitis) (pleiotropy)	21	39091357	5e-54	NA	LINC02940 - RPL23AP12	26974007	Ellinghaus D	Nat Genet	8,726 European ancestry ankylosing spondylitis cases, 19,085 European ancestry Crohn’s disease cases, 6,530 European ancestry psoriasis cases, 3,408 European ancestry primary sclerosing cholangitis cases, 14,513 European ancestry ulcerative colitis cases, 34,213 European ancestry controls	8,726 European ancestry ankylosing spondylitis cases, 19,085 European ancestry Crohn’s disease cases, 6,530 European ancestry psoriasis cases, 3,408 European ancestry primary sclerosing cholangitis cases, 14,513 European ancestry ulcerative colitis cases, 34,213 European ancestry controls	GCST005537	Analysis of five chronic inflammatory diseases identifies 27 new associations and highlights disease-specific patterns at shared loci.
rs78378222	Pulse pressure	17	7668434	2e-10	0.904	TP53	28135244	Warren HR	Nat Genet	140,886 European ancestry individuals	140,886 European ancestry individuals	GCST004278	Genome-wide association analysis identifies novel blood pressure loci and offers biological insights into cardiovascular risk.
rs7537229	Granulocyte percentage of myeloid white cells	1	56440602	6e-14	0.043852	LINC01767 - PLPP3	27863252	Astle WJ	Cell	169,545 European ancestry individuals	169,545 European ancestry individuals	GCST004608	The Allelic Landscape of Human Blood Cell Trait Variation and Links to Common Complex Disease.
rs12459419	Plateletcrit	19	51225221	1e-10	0.0250702	CD33	27863252	Astle WJ	Cell	164,339 European ancestry individuals	164,339 European ancestry individuals	GCST004607	The Allelic Landscape of Human Blood Cell Trait Variation and Links to Common Complex Disease.
rs11576415	Granulocyte percentage of myeloid white cells	1	161212418	2e-10	0.0376514	NDUFS2	27863252	Astle WJ	Cell	169,545 European ancestry individuals	169,545 European ancestry individuals	GCST004608	The Allelic Landscape of Human Blood Cell Trait Variation and Links to Common Complex Disease.
rs35188965	Mean corpuscular volume	5	1104823	2e-30	0.0410019	SLC12A7	27863252	Astle WJ	Cell	172,433 European ancestry individuals	172,433 European ancestry individuals	GCST004602	The Allelic Landscape of Human Blood Cell Trait Variation and Links to Common Complex Disease.
rs73000965	Platelet count	11	114111599	9e-13	0.0281393	ZBTB16	27863252	Astle WJ	Cell	166,066 European ancestry individuals	166,066 European ancestry individuals	GCST004603	The Allelic Landscape of Human Blood Cell Trait Variation and Links to Common Complex Disease.
rs9611177	Schizophrenia	22	39444125	6e-07	1.06383	TAB1 - MGAT3	26198764	Goes FS	Am J Med Genet B Neuropsychiatr Genet	592 Ashkenazi Jewish ancestry cases, 505 Ashkenazi Jewish ancestry controls, 36,989 cases, 113,075 controls	592 Ashkenazi Jewish ancestry cases, 505 Ashkenazi Jewish ancestry controls, 36,989 cases, 113,075 controls	GCST003048	Genome-wide association study of schizophrenia in Ashkenazi Jews.
rs832190	Schizophrenia	3	63856953	3e-08	1.06383	THOC7	26198764	Goes FS	Am J Med Genet B Neuropsychiatr Genet	592 Ashkenazi Jewish ancestry cases, 505 Ashkenazi Jewish ancestry controls, 36,989 cases, 113,075 controls	592 Ashkenazi Jewish ancestry cases, 505 Ashkenazi Jewish ancestry controls, 36,989 cases, 113,075 controls	GCST003048	Genome-wide association study of schizophrenia in Ashkenazi Jews.
rs4411786	Platelet count	20	1950251	2e-28	0.045926	PDYN-AS1	27863252	Astle WJ	Cell	166,066 European ancestry individuals	166,066 European ancestry individuals	GCST004603	The Allelic Landscape of Human Blood Cell Trait Variation and Links to Common Complex Disease.
rs218264	Hematocrit	4	54542708	2e-25	0.042903	LINC02283 - LINC02260	27863252	Astle WJ	Cell	173,039 European ancestry individuals	173,039 European ancestry individuals	GCST004604	The Allelic Landscape of Human Blood Cell Trait Variation and Links to Common Complex Disease.
rs11048425	Metabolic syndrome	12	26187053	1e-12	0.00829916	SSPN	39349817	Park S	Nat Genet	1,384,348 European ancestry individuals	1,384,348 European ancestry individuals	GCST90444487	Multivariate genomic analysis of 5 million people elucidates the genetic architecture of shared components of the metabolic syndrome.
rs9554263	Metabolic syndrome	13	28107091	2e-10	0.0095548	FLT3 - CHCHD2P8	39349817	Park S	Nat Genet	1,384,348 European ancestry individuals	1,384,348 European ancestry individuals	GCST90444487	Multivariate genomic analysis of 5 million people elucidates the genetic architecture of shared components of the metabolic syndrome.
rs799449	Metabolic syndrome	7	44745098	4e-10	0.00954704	OGDH - ZMIZ2	39349817	Park S	Nat Genet	1,384,348 European ancestry individuals	1,384,348 European ancestry individuals	GCST90444487	Multivariate genomic analysis of 5 million people elucidates the genetic architecture of shared components of the metabolic syndrome.
rs13296795	Non-melanoma skin cancer	9	16886540	7e-06	1.28221	BNC2 - RN7SL720P	29739929	Visconti A	Nat Commun	5,912 European ancestry cases, 181,740 European ancestry controls	5,912 European ancestry cases, 181,740 European ancestry controls	GCST005896	Genome-wide association study in 176,678 Europeans reveals genetic loci for tanning response to sun exposure.
rs12580347	Waist-hip ratio	12	3279766	5e-08	NA	TSPAN9	30595370	Kichaev G	Am J Hum Genet	approximately 458,000 European ancestry individuals	approximately 458,000 European ancestry individuals	GCST007067	Leveraging Polygenic Functional Enrichment to Improve GWAS Power.
rs2180369	Adolescent idiopathic scoliosis	14	93050120	8e-07	NA	ITPK1	30019117	Liu J	Hum Genet	196 cases, 303 controls	196 cases, 303 controls	GCST006287	The coexistence of copy number variations (CNVs) and single nucleotide polymorphisms (SNPs) at a locus can result in distorted calculations of the significance in associating SNPs to disease.
rs2376585	Waist-to-hip ratio adjusted for BMI	17	78421802	1e-11	NA	PGS1	31669095	Zhu Z	J Allergy Clin Immunol	457,690 European ancestry individuals	457,690 European ancestry individuals	GCST009858	Shared Genetic and Experimental Links between Obesity-Related Traits and Asthma Subtypes in UK Biobank.
rs10931933	Multiple sclerosis	2	201247748	1e-06	1.0573	CASP8	31604244	International Multiple Sclerosis Genetics Consortium	Science	14,802 European and unknown ancestry cases, 26,703 European and unknown ancestry controls	14,802 European and unknown ancestry cases, 26,703 European and unknown ancestry controls	GCST009597	Multiple sclerosis genomic map implicates peripheral immune cells and microglia in susceptibility.
rs6077868	White matter microstructure (axial diusivities)	20	10669113	4e-09	NA	JAG1	31666681	Zhao B	Mol Psychiatry	17,706 European ancestry individuals	17,706 European ancestry individuals	GCST009537	Large-scale GWAS reveals genetic architecture of brain white matter microstructure and genetic overlap with cognitive and mental health traits (n = 17,706).
rs4712614	Hematocrit	6	21382534	6e-10	NA	CDKAL1 - LINC00581	32888493	Chen MH	Cell	737,823 African American or Afro-Caribbean, African ancestry, European ancestry, East Asian ancestry, Hispanic or Latin American and South Asian ancestry individuals	737,823 African American or Afro-Caribbean, African ancestry, European ancestry, East Asian ancestry, Hispanic or Latin American and South Asian ancestry individuals	GCST90002308	Trans-ethnic and Ancestry-Specific Blood-Cell Genetics in 746,667 Individuals from 5 Global Populations.
rs672058	Blood protein levels	11	116893305	5e-12	0.2925	SIK3	27532455	Sun W	PLoS Genet	1,340 European ancestry individuals	1,340 European ancestry individuals	GCST010104	Common Genetic Polymorphisms Influence Blood Biomarker Measurements in COPD.
rs7803075	Mean corpuscular hemoglobin	7	131057307	9e-08	NA	LINC-PINT	30595370	Kichaev G	Am J Hum Genet	approximately 443,000 European ancestry individuals	approximately 443,000 European ancestry individuals	GCST007068	Leveraging Polygenic Functional Enrichment to Improve GWAS Power.
rs865483	Hemoglobin	17	37491071	1e-09	0.013945	DUSP14	32888494	Vuckovic D	Cell	408,112 British individuals	408,112 British individuals	GCST90002384	The Polygenic and Monogenic Basis of Blood Traits and Diseases.
rs114064810	Waist circumference adjusted for body mass index	5	108831902	2e-13	NA	FER	31669095	Zhu Z	J Allergy Clin Immunol	457,690 European ancestry individuals	457,690 European ancestry individuals	GCST009867	Shared Genetic and Experimental Links between Obesity-Related Traits and Asthma Subtypes in UK Biobank.
rs61754230	General cognitive ability	12	71785666	5e-08	5.462	RAB21	29844566	Davies G	Nat Commun	up to 300,486 European ancestry individuals	up to 300,486 European ancestry individuals	GCST006269	Study of 300,486 individuals identifies 148 independent genetic loci influencing general cognitive function.
rs2049045	Snoring	11	27672694	9e-11	1.04167	BDNF-AS, BDNF	30804565	Jansen PR	Nat Genet	359,916 European ancestry individuals	359,916 European ancestry individuals	GCST007985	Genome-wide analysis of insomnia in 1,331,010 individuals identifies new risk loci and functional pathways.
rs2179593	Mean corpuscular hemoglobin	20	44031646	1e-20	NA	TOX2	30595370	Kichaev G	Am J Hum Genet	approximately 443,000 European ancestry individuals	approximately 443,000 European ancestry individuals	GCST007068	Leveraging Polygenic Functional Enrichment to Improve GWAS Power.
rs3749748	Red cell distribution width	5	128014857	3e-16	0.1173	SLC12A2-DT	32171239	Hodonsky CJ	BMC Genomics	17,272 Hispanic or Latin American individuals	17,272 Hispanic or Latin American individuals	GCST90012233	Ancestry-specific associations identified in genome-wide combined-phenotype study of red blood cell traits emphasize benefits of diversity in genomics.
rs11965885	Reaction time	6	43725357	2e-06	0.0083895	EXOSC8P1 - VEGFA	29844566	Davies G	Nat Commun	330,069 European ancestry individuals	330,069 European ancestry individuals	GCST006268	Study of 300,486 individuals identifies 148 independent genetic loci influencing general cognitive function.
rs9913973	Mean corpuscular hemoglobin	17	28868853	1e-17	0.035546	MIR4732 - FLOT2	32888493	Chen MH	Cell	119,629 East Asian ancestry individuals	119,629 East Asian ancestry individuals	GCST90002323	Trans-ethnic and Ancestry-Specific Blood-Cell Genetics in 746,667 Individuals from 5 Global Populations.
rs144317085	Mean corpuscular hemoglobin	4	104884951	1e-13	NA	CXXC4-AS1 - RPL6P14	32888493	Chen MH	Cell	630,125 African American or Afro-Caribbean, African ancestry, European ancestry, East Asian ancestry, Hispanic or Latin American and South Asian ancestry individuals	630,125 African American or Afro-Caribbean, African ancestry, European ancestry, East Asian ancestry, Hispanic or Latin American and South Asian ancestry individuals	GCST90002326	Trans-ethnic and Ancestry-Specific Blood-Cell Genetics in 746,667 Individuals from 5 Global Populations.
rs6055955	Mean corpuscular hemoglobin concentration	20	8623534	3e-13	0.014666	PLCB1	32888493	Chen MH	Cell	491,553 European ancestry individuals	491,553 European ancestry individuals	GCST90002328	Trans-ethnic and Ancestry-Specific Blood-Cell Genetics in 746,667 Individuals from 5 Global Populations.
rs2561758	Red blood cell count	5	173778279	5e-09	NA	LINC01942	30595370	Kichaev G	Am J Hum Genet	approximately 445,000 European ancestry individuals	approximately 445,000 European ancestry individuals	GCST007069	Leveraging Polygenic Functional Enrichment to Improve GWAS Power.
rs2247856	Mean corpuscular volume	17	76385474	3e-15	0.014746	SPHK1	32888493	Chen MH	Cell	544,127 European ancestry individuals	544,127 European ancestry individuals	GCST90002334	Trans-ethnic and Ancestry-Specific Blood-Cell Genetics in 746,667 Individuals from 5 Global Populations.
rs17295246	Mean corpuscular volume	3	123386874	5e-14	0.016426	ADCY5	32888493	Chen MH	Cell	544,127 European ancestry individuals	544,127 European ancestry individuals	GCST90002334	Trans-ethnic and Ancestry-Specific Blood-Cell Genetics in 746,667 Individuals from 5 Global Populations.
rs10804990	Mean corpuscular volume	4	6917934	3e-12	0.013185	TBC1D14	32888493	Chen MH	Cell	544,127 European ancestry individuals	544,127 European ancestry individuals	GCST90002334	Trans-ethnic and Ancestry-Specific Blood-Cell Genetics in 746,667 Individuals from 5 Global Populations.
rs35267807	Red blood cell count	10	45706981	7e-11	NA	FAM21FP	30595370	Kichaev G	Am J Hum Genet	approximately 445,000 European ancestry individuals	approximately 445,000 European ancestry individuals	GCST007069	Leveraging Polygenic Functional Enrichment to Improve GWAS Power.
rs113028115	Cerebral white matter volume	19	42263441	2e-06	NA	ERF - CIC	31530798	Alliey-Rodriguez N	Transl Psychiatry	87 European ancestry Schizophrenia cases, 85 African American Schizophrenia cases, 15 Schizophrenia cases, 67 European ancestry Schizoaffective disorder cases, 53 African American Schizoaffective disorder cases, 7 Schizoaffective disorder cases, 130 European ancestry Bipolar disorders cases, 33 African American Bipolar disorders cases, 6 Bipolar disorders cases, 199 European ancestry controls, 79…	87 European ancestry Schizophrenia cases, 85 African American Schizophrenia cases, 15 Schizophrenia cases, 67 European ancestry Schizoaffective disorder cases, 53 African American Schizoaffective disorder cases, 7 Schizoaffective disorder cases, 130 European ancestry Bipolar disorders cases, 33 African American Bipolar disorders cases, 6 Bipolar disorders cases, 199 European ancestry controls, 79…	GCST009206	NRXN1 is associated with enlargement of the temporal horns of the lateral ventricles in psychosis.
rs3795503	Height	1	180936558	1e-23	NA	KIAA1614	30595370	Kichaev G	Am J Hum Genet	approximately 458,000 European ancestry individuals	approximately 458,000 European ancestry individuals	GCST007841	Leveraging Polygenic Functional Enrichment to Improve GWAS Power.
rs4842266	Peripheral artery disease	12	79557786	1e-09	1.06	SYT1 - NOP56P3	31285632	Klarin D	Nat Med	24,009 European ancestry cases, 150,983 European ancestry controls, 5,373 African ancestry cases, 42,485 African ancestry controls, 1,925 Hispanic cases, 18,285 Hispanic controls	24,009 European ancestry cases, 150,983 European ancestry controls, 5,373 African ancestry cases, 42,485 African ancestry controls, 1,925 Hispanic cases, 18,285 Hispanic controls	GCST008474	Genome-wide association study of peripheral artery disease in the Million Veteran Program.
rs11250076	Parental longevity (father's age at death or father's attained age)	8	10790313	1e-06	NA	PINX1, PINX1	31484785	Wright KM	G3 (Bethesda)	up to 699,000 European ancestry individuals	up to 699,000 European ancestry individuals	GCST009450	A Prospective Analysis of Genetic Variants Associated with Human Lifespan.
rs2296028	Heel bone mineral density	13	51771501	4e-11	NA	DHRS12	30595370	Kichaev G	Am J Hum Genet	approximately 446,000 European ancestry individuals	approximately 446,000 European ancestry individuals	GCST007066	Leveraging Polygenic Functional Enrichment to Improve GWAS Power.
rs9390461	Factor VIII levels	6	147380081	2e-14	NA	STXBP5	30586737	Sabater-Lleal M	Circulation	25,897 European ancestry individuals, 4,500 African American individuals, 773 Asian ancestry individuals, 1,440 Hispanic individuals	25,897 European ancestry individuals, 4,500 African American individuals, 773 Asian ancestry individuals, 1,440 Hispanic individuals	GCST007445	Genome-Wide Association Trans-Ethnic Meta-Analyses Identifies Novel Associations Regulating Coagulation Factor VIII and von Willebrand Factor Plasma Levels.
rs10437954	Systolic blood pressure	12	57610139	4e-13	0.3025	DTX3 - ARHGEF25	30578418	Giri A	Nat Genet	365,998 European ancestry individuals, 63,490 African ancestry individuals, 22,802 Hispanic individuals, 4,792 Asian ancestry individuals, 2,695 Native American ancestry individuals	365,998 European ancestry individuals, 63,490 African ancestry individuals, 22,802 Hispanic individuals, 4,792 Asian ancestry individuals, 2,695 Native American ancestry individuals	GCST007267	Trans-ethnic association study of blood pressure determinants in over 750,000 individuals.
rs837231	Sour taste perception in obesity with metabolic syndrome	8	129975642	2e-06	0.477	CYRIB	31005965	Coltell O	Am J Clin Nutr	378 individuals	378 individuals	GCST008023	Association between taste perception and adiposity in overweight or obese older subjects with metabolic syndrome and identification of novel taste-related genes.
rs61739285	Male-pattern baldness	16	27469476	4e-11	0.0559936	GTF3C1	30573740	Yap CX	Nat Commun	205,327 European ancestry males	205,327 European ancestry males	GCST007020	Dissection of genetic variation and evidence for pleiotropy in male pattern baldness.
rs1228024	Fat-free mass	11	47929801	1e-09	0.15549	NUP160 - PTPRJ	30593698	Hubel C	Am J Med Genet B Neuropsychiatr Genet	70,700 European ancestry female individuals, 85,261 European ancestry male individuals	70,700 European ancestry female individuals, 85,261 European ancestry male individuals	GCST007063	Genomics of body fat percentage may contribute to sex bias in anorexia nervosa.
rs303753	Alcohol consumption (drinks per week)	18	23494958	4e-08	0.0129246	RIOK3 - RMC1	30643258	Karlsson Linner R	Nat Genet	414,343 European ancestry individuals	414,343 European ancestry individuals	GCST007328	Genome-wide association analyses of risk tolerance and risky behaviors in over 1 million individuals identify hundreds of loci and shared genetic influences.
rs11039216	Systolic blood pressure	11	47385041	1e-21	0.3127	SPI1, SLC39A13-AS1	30578418	Giri A	Nat Genet	365,998 European ancestry individuals, 63,490 African ancestry individuals, 22,802 Hispanic individuals, 4,792 Asian ancestry individuals, 2,695 Native American ancestry individuals	365,998 European ancestry individuals, 63,490 African ancestry individuals, 22,802 Hispanic individuals, 4,792 Asian ancestry individuals, 2,695 Native American ancestry individuals	GCST007267	Trans-ethnic association study of blood pressure determinants in over 750,000 individuals.
rs5765524	Red blood cell count	22	45596337	3e-14	0.0278685	FBLN1	27863252	Astle WJ	Cell	172,952 European ancestry individuals	172,952 European ancestry individuals	GCST004601	The Allelic Landscape of Human Blood Cell Trait Variation and Links to Common Complex Disease.
rs4616635	Waist-to-hip ratio adjusted for BMI x sex x age interaction (4df test)	3	64716599	6e-21	NA	ADAMTS9-AS2	26426971	Winkler TW	PLoS Genet	up to 43,776 European ancestry men aged <50, up to 50,526 European ancestry women aged <50, up to 69,944 European ancestry men aged >50, up to 88,129 European ancestry women aged >50	up to 43,776 European ancestry men aged <50, up to 50,526 European ancestry women aged <50, up to 69,944 European ancestry men aged >50, up to 88,129 European ancestry women aged >50	GCST005962	The Influence of Age and Sex on Genetic Associations with Adult Body Size and Shape: A Large-Scale Genome-Wide Interaction Study.
rs5112	Serum alkaline phosphatase levels	19	44927023	2e-16	0.03	APOC1P1, APOC1P1	31666285	Olafsson S	Cancer Epidemiol Biomarkers Prev	162,774 Icelandic ancestry individuals	162,774 Icelandic ancestry individuals	GCST009652	Common and rare sequence variants influencing tumor biomarkers in blood.
rs7183988	Insomnia	15	90885359	2e-08	1.04275	FES	30804565	Jansen PR	Nat Genet	651,923 European ancestry males, 679,087 European ancestry females	651,923 European ancestry males, 679,087 European ancestry females	GCST007988	Genome-wide analysis of insomnia in 1,331,010 individuals identifies new risk loci and functional pathways.
rs2609279	Lung function (FEV1/FVC)	4	88934344	2e-76	0.0537	FAM13A	30804560	Shrine N	Nat Genet	321,047 European ancestry individuals	321,047 European ancestry individuals	GCST007431	New genetic signals for lung function highlight pathways and chronic obstructive pulmonary disease associations across multiple ancestries.
rs2713573	Mean platelet volume	3	128598430	1e-12	NA	LINC01565 - RPN1	32888493	Chen MH	Cell	484,042 African American or Afro-Caribbean, African ancestry, European ancestry, East Asian ancestry, Hispanic or Latin American and South Asian ancestry individuals	484,042 African American or Afro-Caribbean, African ancestry, European ancestry, East Asian ancestry, Hispanic or Latin American and South Asian ancestry individuals	GCST90002349	Trans-ethnic and Ancestry-Specific Blood-Cell Genetics in 746,667 Individuals from 5 Global Populations.
rs61751937	Mean platelet volume	9	110549951	1e-17	NA	SVEP1	32888493	Chen MH	Cell	484,042 African American or Afro-Caribbean, African ancestry, European ancestry, East Asian ancestry, Hispanic or Latin American and South Asian ancestry individuals	484,042 African American or Afro-Caribbean, African ancestry, European ancestry, East Asian ancestry, Hispanic or Latin American and South Asian ancestry individuals	GCST90002349	Trans-ethnic and Ancestry-Specific Blood-Cell Genetics in 746,667 Individuals from 5 Global Populations.
rs861400	Mean corpuscular volume	16	88795935	2e-19	0.042888	PIEZO1 - CDT1	32888493	Chen MH	Cell	121,047 East Asian ancestry individuals	121,047 East Asian ancestry individuals	GCST90002335	Trans-ethnic and Ancestry-Specific Blood-Cell Genetics in 746,667 Individuals from 5 Global Populations.
rs78358631	Red blood cell count	20	10738659	2e-09	NA	LINC01752	30595370	Kichaev G	Am J Hum Genet	approximately 445,000 European ancestry individuals	approximately 445,000 European ancestry individuals	GCST007069	Leveraging Polygenic Functional Enrichment to Improve GWAS Power.
rs80093687	Mean platelet volume	17	57386496	6e-32	NA	MSI2	32888493	Chen MH	Cell	484,042 African American or Afro-Caribbean, African ancestry, European ancestry, East Asian ancestry, Hispanic or Latin American and South Asian ancestry individuals	484,042 African American or Afro-Caribbean, African ancestry, European ancestry, East Asian ancestry, Hispanic or Latin American and South Asian ancestry individuals	GCST90002349	Trans-ethnic and Ancestry-Specific Blood-Cell Genetics in 746,667 Individuals from 5 Global Populations.
rs3793537	Immature fraction of reticulocytes	9	35687559	3e-12	0.0172248	TPM2	32888494	Vuckovic D	Cell	408,112 British individuals	408,112 British individuals	GCST90002387	The Polygenic and Monogenic Basis of Blood Traits and Diseases.
rs6504179	Red blood cell count	17	63735635	5e-13	NA	STRADA	30595370	Kichaev G	Am J Hum Genet	approximately 445,000 European ancestry individuals	approximately 445,000 European ancestry individuals	GCST007069	Leveraging Polygenic Functional Enrichment to Improve GWAS Power.
rs10935473	Protein quantitative trait loci	3	98698056	1e-35	NA	WWP1P1 - ST3GAL6-AS1	32492067	Ruffieux H	PLoS Comput Biol	394 European ancestry individuals	394 European ancestry individuals	GCST010900	A fully joint Bayesian quantitative trait locus mapping of human protein abundance in plasma.
rs61759532	Autoimmune thyroid disease	17	7337072	1e-15	1.09	ACAP1	32581359	Saevarsdottir S	Nature	30,234 European ancestry cases, 724,172 European ancestry controls	30,234 European ancestry cases, 724,172 European ancestry controls	GCST010571	FLT3 stop mutation increases FLT3 ligand level and risk of autoimmune thyroid disease.
rs79780963	Schizophrenia (MTAG)	10	103192742	3e-14	NA	NT5C2	32606422	Wu Y	Transl Psychiatry	65,967 individuals	65,967 individuals	GCST010645	Multi-trait analysis for genome-wide association study of five psychiatric disorders.
rs464609	Platelet count	5	34654372	1e-16	0.01529	RAI14-DT	32888493	Chen MH	Cell	542,827 European ancestry individuals	542,827 European ancestry individuals	GCST90002357	Trans-ethnic and Ancestry-Specific Blood-Cell Genetics in 746,667 Individuals from 5 Global Populations.
rs641738	Platelet count	19	54173068	3e-23	0.019413	TMC4	32888493	Chen MH	Cell	542,827 European ancestry individuals	542,827 European ancestry individuals	GCST90002357	Trans-ethnic and Ancestry-Specific Blood-Cell Genetics in 746,667 Individuals from 5 Global Populations.
rs9902260	Coronary artery disease	17	64322512	3e-09	0.0652485	PECAM1	33020668	Koyama S	Nat Genet	25,892 Japanese ancestry cases, 142,336 Japanese ancestry controls	25,892 Japanese ancestry cases, 142,336 Japanese ancestry controls	GCST010867	Population-specific and trans-ancestry genome-wide analyses identify distinct and shared genetic risk loci for coronary artery disease.
rs2667648	Platelet count	16	78547241	2e-14	NA	WWOX	32888493	Chen MH	Cell	721,201 African American or Afro-Caribbean, African ancestry, European ancestry, East Asian ancestry, Hispanic or Latin American and South Asian ancestry individuals	721,201 African American or Afro-Caribbean, African ancestry, European ancestry, East Asian ancestry, Hispanic or Latin American and South Asian ancestry individuals	GCST90002361	Trans-ethnic and Ancestry-Specific Blood-Cell Genetics in 746,667 Individuals from 5 Global Populations.
rs7159281	Platelet count	14	23287395	1e-11	0.013476	HOMEZ	32888493	Chen MH	Cell	542,827 European ancestry individuals	542,827 European ancestry individuals	GCST90002357	Trans-ethnic and Ancestry-Specific Blood-Cell Genetics in 746,667 Individuals from 5 Global Populations.
rs142647938	Autoimmune traits	2	162516642	4e-08	NA	KCNH7	30595370	Kichaev G	Am J Hum Genet	approximately 459,000 European ancestry individuals	approximately 459,000 European ancestry individuals	GCST007071	Leveraging Polygenic Functional Enrichment to Improve GWAS Power.
rs7873409	Platelet count	9	70465451	7e-25	NA	KLF9 - TRPM3	32888493	Chen MH	Cell	721,201 African American or Afro-Caribbean, African ancestry, European ancestry, East Asian ancestry, Hispanic or Latin American and South Asian ancestry individuals	721,201 African American or Afro-Caribbean, African ancestry, European ancestry, East Asian ancestry, Hispanic or Latin American and South Asian ancestry individuals	GCST90002361	Trans-ethnic and Ancestry-Specific Blood-Cell Genetics in 746,667 Individuals from 5 Global Populations.
rs342294	Platelet count	7	106732176	3e-295	0.067703	CCDC71L - LINC02577	32888493	Chen MH	Cell	542,827 European ancestry individuals	542,827 European ancestry individuals	GCST90002357	Trans-ethnic and Ancestry-Specific Blood-Cell Genetics in 746,667 Individuals from 5 Global Populations.
rs6073143	Type 2 diabetes	20	43602055	4e-12	0.0304	IFT52	32541925	Vujkovic M	Nat Genet	148,726 European ancestry cases, 24,646 African American cases, 8,616 Hispanic cases, 46,511 Asian ancestry cases, 965,732 European ancestry controls, 31,446 African American controls, 11,829 Hispanic controls, 169,776 Asian ancestry controls	148,726 European ancestry cases, 24,646 African American cases, 8,616 Hispanic cases, 46,511 Asian ancestry cases, 965,732 European ancestry controls, 31,446 African American controls, 11,829 Hispanic controls, 169,776 Asian ancestry controls	GCST010557	Discovery of 318 new risk loci for type 2 diabetes and related vascular outcomes among 1.4 million participants in a multi-ancestry meta-analysis.
rs743580	Body mass index	15	74035775	9e-10	NA	PML	31669095	Zhu Z	J Allergy Clin Immunol	457,822 European ancestry individuals	457,822 European ancestry individuals	GCST009871	Shared Genetic and Experimental Links between Obesity-Related Traits and Asthma Subtypes in UK Biobank.
rs12941356	Resting heart rate	17	17813217	5e-08	0.1809	SREBF1	27798624	Eppinga RN	Nat Genet	127,919 European ancestry individuals, 2,478 Asian ancestry individuals, 1,734 Black individuals, 684 Mixed ancestry individuals, 1,436 individuals	127,919 European ancestry individuals, 2,478 Asian ancestry individuals, 1,734 Black individuals, 684 Mixed ancestry individuals, 1,436 individuals	GCST003818	Identification of genomic loci associated with resting heart rate and shared genetic predictors with all-cause mortality.
rs2076211	Total cholesterol levels	22	43933198	1e-06	0.0219	PNPLA3	28334899	Spracklen CN	Hum Mol Genet	32,576 East Asian ancestry individuals, 187,365 European ancestry individuals	32,576 East Asian ancestry individuals, 187,365 European ancestry individuals	GCST004235	Association analyses of East Asian individuals and trans-ancestry analyses with European individuals reveal new loci associated with cholesterol and triglyceride levels.
rs1335540	Immature fraction of reticulocytes	10	26438309	6e-12	0.024902	GAD2 - APBB1IP	27863252	Astle WJ	Cell	170,548 European ancestry individuals	170,548 European ancestry individuals	GCST004628	The Allelic Landscape of Human Blood Cell Trait Variation and Links to Common Complex Disease.
rs1107943	Celiac disease	6	159077235	3e-06	1.18	TAGAP, TAGAP-AS1	22057235	Trynka G	Nat Genet	11,812 European ancestry cases, 229 Indian ancestry cases, 11,837 European ancestry controls, 391 Indian ancestry controls	11,812 European ancestry cases, 229 Indian ancestry cases, 11,837 European ancestry controls, 391 Indian ancestry controls	GCST005523	Dense genotyping identifies and localizes multiple common and rare variant association signals in celiac disease.
rs9796	Menopause (age at onset)	15	40979249	1e-10	0.13	INO80	26414677	Day FR	Nat Genet	up to 69,626 European ancestry women	up to 69,626 European ancestry women	GCST005312	Large-scale genomic analyses link reproductive aging to hypothalamic signaling, breast cancer susceptibility and BRCA1-mediated DNA repair.
rs118083884	Tonsillectomy	17	16619608	1e-07	0.2027	SRSF6P2 - ZNF624	28928442	Tian C	Nat Commun	60,098 European ancestry cases, 113,323 European ancestry controls	60,098 European ancestry cases, 113,323 European ancestry controls	GCST005014	Genome-wide association and HLA region fine-mapping studies identify susceptibility loci for multiple common infections.
rs6942227	Bipolar disorder lithium response (categorical) or schizophrenia	6	25177280	3e-08	NA	CMAHP	29121268	Amare AT	JAMA Psychiatry	704 European and East Asian ancestry lithium responder bipolar disorder cases, 1,662 European and East Asian ancestry lithium non-responder bipolar disorder controls, 36,989 schizophrenia cases, controls (see Ripke 2014 PMID:25056061).	704 European and East Asian ancestry lithium responder bipolar disorder cases, 1,662 European and East Asian ancestry lithium non-responder bipolar disorder controls, 36,989 schizophrenia cases, controls (see Ripke 2014 PMID:25056061).	GCST005082	Association of Polygenic Score for Schizophrenia and HLA Antigen and Inflammation Genes With Response to Lithium in Bipolar Affective Disorder: A Genome-Wide Association Study.
rs7304603	Apolipoprotein A1 levels	12	70720620	2e-10	0.0126461	PTPRR	32203549	Richardson TG	PLoS Med	393,193 European ancestry individuals	393,193 European ancestry individuals	GCST010241	Evaluating the relationship between circulating lipoprotein lipids and apolipoproteins with risk of coronary heart disease: A multivariable Mendelian randomisation analysis.
rs72926946	HDL cholesterol levels	2	202613145	2e-23	0.0207168	BMPR2 - MTCO1P17	32203549	Richardson TG	PLoS Med	403,943 European ancestry individuals	403,943 European ancestry individuals	GCST010242	Evaluating the relationship between circulating lipoprotein lipids and apolipoproteins with risk of coronary heart disease: A multivariable Mendelian randomisation analysis.
rs34855406	Type 2 diabetes	17	42579393	2e-12	1.05	PSMC3IP - RETREG3	30297969	Mahajan A	Nat Genet	74,124 European ancestry cases, 824,006 European ancestry controls	74,124 European ancestry cases, 824,006 European ancestry controls	GCST009379	Fine-mapping type 2 diabetes loci to single-variant resolution using high-density imputation and islet-specific epigenome maps.
rs12427846	Heel bone mineral density	13	36917513	7e-16	0.0174762	SMAD9	30598549	Morris JA	Nat Genet	426,824 British ancestry individuals	426,824 British ancestry individuals	GCST006979	An atlas of genetic influences on osteoporosis in humans and mice.
rs7488780	HDL cholesterol levels	12	20426458	9e-10	0.0145424	PDE3A	32203549	Richardson TG	PLoS Med	403,943 European ancestry individuals	403,943 European ancestry individuals	GCST010242	Evaluating the relationship between circulating lipoprotein lipids and apolipoproteins with risk of coronary heart disease: A multivariable Mendelian randomisation analysis.
rs9480889	Triglyceride levels	6	108867818	1e-11	0.0163419	ARMC2	32203549	Richardson TG	PLoS Med	441,016 European ancestry individuals	441,016 European ancestry individuals	GCST010244	Evaluating the relationship between circulating lipoprotein lipids and apolipoproteins with risk of coronary heart disease: A multivariable Mendelian randomisation analysis.
rs1007938	LDL cholesterol levels	12	26649616	1e-08	0.0121506	ITPR2	32203549	Richardson TG	PLoS Med	440,546 European ancestry individuals	440,546 European ancestry individuals	GCST010245	Evaluating the relationship between circulating lipoprotein lipids and apolipoproteins with risk of coronary heart disease: A multivariable Mendelian randomisation analysis.
rs1618332	OTU97_8 (Ruminococcaceae) abundance	15	41892596	4e-06	0.0976557	SPTBN5	33462482	Ruhlemann MC	Nat Genet	8,956 German ancestry individuals	8,956 German ancestry individuals	GCST90011412	Genome-wide association study in 8,956 German individuals identifies influence of ABO histo-blood groups on gut microbiome.
rs2494747	HDL cholesterol x physical activity interaction (2df test)	14	104792100	3e-09	NA	AKT1	30670697	Kilpelainen TO	Nat Commun	7,395 African American inactive individuals, 13,092 African American active individuals, 2,753 Asian ancestry inactive individuals, 3,650 Asian ancestry active individuals, 22,963 European ancestry inactive individuals, 61,939 European ancestry active individuals, 2,829 Hispanic or Latin American inactive individuals, 6,358 Hispanic or Latin American active individuals	7,395 African American inactive individuals, 13,092 African American active individuals, 2,753 Asian ancestry inactive individuals, 3,650 Asian ancestry active individuals, 22,963 European ancestry inactive individuals, 61,939 European ancestry active individuals, 2,829 Hispanic or Latin American inactive individuals, 6,358 Hispanic or Latin American active individuals	GCST007282	Multi-ancestry study of blood lipid levels identifies four loci interacting with physical activity.
rs9558	OTU99_62 (Ruminococcaceae) abundance	2	30259051	2e-06	0.152411	LBH	33462482	Ruhlemann MC	Nat Genet	8,956 German ancestry individuals	8,956 German ancestry individuals	GCST90011469	Genome-wide association study in 8,956 German individuals identifies influence of ABO histo-blood groups on gut microbiome.
rs7326825	Spherical equivalent	13	49539314	9e-13	0.08	RCBTB1	32352494	Han X	JAMA Ophthalmol	95,827 European ancestry individuals	95,827 European ancestry individuals	GCST010378	Association of Myopia and Intraocular Pressure With Retinal Detachment in European Descent Participants of the UK Biobank Cohort: A Mendelian Randomization Study.
rs10802496	C-reactive protein levels	1	247409226	4e-12	0.0192288	NLRP3	31900758	Han X	Eur J Epidemiol	418,642 British ancestry individuals	418,642 British ancestry individuals	GCST009777	Using Mendelian randomization to evaluate the causal relationship between serum C-reactive protein levels and age-related macular degeneration.
rs1545536	C-reactive protein levels	8	143560999	6e-19	0.0202871	GSDMD	31900758	Han X	Eur J Epidemiol	418,642 British ancestry individuals	418,642 British ancestry individuals	GCST009777	Using Mendelian randomization to evaluate the causal relationship between serum C-reactive protein levels and age-related macular degeneration.
rs7314285	C-reactive protein levels	12	111084222	5e-08	0.0215713	CUX2	31900758	Han X	Eur J Epidemiol	418,642 British ancestry individuals	418,642 British ancestry individuals	GCST009777	Using Mendelian randomization to evaluate the causal relationship between serum C-reactive protein levels and age-related macular degeneration.
rs3176334	Alanine aminotransferase levels	6	36680587	1e-08	5.69	CDKN1A	33547301	Chen VL	Nat Commun	390,812 European ancestry individuals	390,812 European ancestry individuals	GCST90011898	Genome-wide association study of serum liver enzymes implicates diverse metabolic and liver pathology.
rs778125	Reticulocyte fraction of red cells	1	56140074	8e-49	0.0342986	LINC01755 - RPSAP20	32888494	Vuckovic D	Cell	408,112 British individuals	408,112 British individuals	GCST90002406	The Polygenic and Monogenic Basis of Blood Traits and Diseases.
rs2071479	Type 2 diabetes	6	32813335	7e-11	0.1473	HLA-DOB	30054458	Xue A	Nat Commun	61,714 European ancestry cases, 1,178 Pakistani ancestry cases, 593,952 European ancestry controls, 2,472 Pakistani ancestry controls	61,714 European ancestry cases, 1,178 Pakistani ancestry cases, 593,952 European ancestry controls, 2,472 Pakistani ancestry controls	GCST006867	Genome-wide association analyses identify 143 risk variants and putative regulatory mechanisms for type 2 diabetes.
rs13132853	wg rh intensity-contrast parsorbitalis	4	38678394	1e-11	0.069	KLF3	33875891	Smith SM	Nat Neurosci	21,281 British ancestry individuals	21,281 British ancestry individuals	GCST90003845	An expanded set of genome-wide association studies of brain imaging phenotypes in UK Biobank.
rs10810099	Educational attainment (MTAG)	9	14161928	3e-23	0.0146	NFIB	30038396	Lee JJ	Nat Genet	1,311,438 European ancestry individuals	1,311,438 European ancestry individuals	GCST006571	Gene discovery and polygenic prediction from a genome-wide association study of educational attainment in 1.1 million individuals.
rs139795227	CD80 on myeloid Dendritic Cell	1	92376810	8e-19	0.5725	RPAP2	32929287	Orru V	Nat Genet	2,871 Sardinian (founder/genetic isolate) ancestry individuals	2,871 Sardinian (founder/genetic isolate) ancestry individuals	GCST90002035	Complex genetic signatures in immune cells underlie autoimmunity and inform therapy.
rs10152590	Rheumatoid arthritis	15	69755777	4e-09	0.139	DRAIC	33310728	Ha E	Ann Rheum Dis	14,361 European ancestry cases, 43,923 European ancestry controls, 8,267 East Asian ancestry cases, 244,741 East Asian ancestry controls	14,361 European ancestry cases, 43,923 European ancestry controls, 8,267 East Asian ancestry cases, 244,741 East Asian ancestry controls	GCST90013534	Large-scale meta-analysis across East Asian and European populations updated genetic architecture and variant-driven biology of rheumatoid arthritis, identifying 11 novel susceptibility loci.
rs56278466	Aspartate aminotransferase platelet ratio index in high alcohol intake	10	17833858	3e-27	0.01564	MRC1	32561361	Innes H	Gastroenterology	33,330 British ancestry individuals	33,330 British ancestry individuals	GCST90011735	Genome-wide Association Study for Alcohol-related Cirrhosis Identifies Risk Loci in MARC1 and HNRNPUL1.
rs75166367	CLEC14A/EPHB4 protein level ratio	2	162107791	7e-31	0.164097	EIF3EP2 - GCG	38412862	Suhre K	Cell Genom	43,509 European ancestry individuals	43,509 European ancestry individuals	GCST90314079	Genetic associations with ratios between protein levels detect new pQTLs and reveal protein-protein interactions.
rs76378167	RHOC/TBCB protein level ratio	19	18322904	2e-17	0.124211	LSM4	38412862	Suhre K	Cell Genom	43,509 European ancestry individuals	43,509 European ancestry individuals	GCST90315774	Genetic associations with ratios between protein levels detect new pQTLs and reveal protein-protein interactions.
rs214082	CTSF/NAAA protein level ratio	11	17277843	1e-23	0.070434	NUCB2	38412862	Suhre K	Cell Genom	43,509 European ancestry individuals	43,509 European ancestry individuals	GCST90314314	Genetic associations with ratios between protein levels detect new pQTLs and reveal protein-protein interactions.
rs61871633	Mean corpuscular volume	11	2345030	3e-11	0.13	CD81-AS1	34104963	Thompson A	Hum Mol Genet	362,595 British ancestry individuals	362,595 British ancestry individuals	GCST90056174	Assessing the impact of alcohol consumption on the genetic contribution to mean corpuscular volume.
rs2759301	Atrial fibrillation (MTAG)	15	80701947	8e-09	0.00822538	ABHD17C	39537608	Koskeridis F	Nat Commun	at least 60,620 European ancestry cases, at least 970,216 European ancestry controls (MTAG boosted by 455,258 Alzheimer's disease samples)	at least 60,620 European ancestry cases, at least 970,216 European ancestry controls (MTAG boosted by 455,258 Alzheimer's disease samples)	GCST90449054	Multi-trait association analysis reveals shared genetic loci between Alzheimer's disease and cardiovascular traits.
rs10035782	A body shape index	5	173843325	8e-09	0.0168983	LINC01485 - CPEB4	34021172	Christakoudi S	Sci Rep	219,872 British ancestry women	219,872 British ancestry women	GCST90020024	GWAS of allometric body-shape indices in UK Biobank identifies loci suggesting associations with morphogenesis, organogenesis, adrenal cell renewal and cancer.
rs11556624	High density lipoprotein cholesterol levels	17	39659051	4e-11	0.0534	STARD3	33462484	Sinnott-Armstrong N	Nat Genet	313,372 European ancestry individuals, 5,573 African ancestry individuals, 6,689 South Asian ancestry individuals	313,372 European ancestry individuals, 5,573 African ancestry individuals, 6,689 South Asian ancestry individuals	GCST90019510	Genetics of 35 blood and urine biomarkers in the UK Biobank.
rs62267567	A body shape index	3	129546638	4e-08	0.0306543	H1-8	34021172	Christakoudi S	Sci Rep	219,872 British ancestry women	219,872 British ancestry women	GCST90020024	GWAS of allometric body-shape indices in UK Biobank identifies loci suggesting associations with morphogenesis, organogenesis, adrenal cell renewal and cancer.
rs28732146	Familial combined hyperlipidemia defined by Dutch criteria	6	31593576	1e-08	0.0792972	NCR3 - UQCRHP1	34906840	Trinder M	Atherosclerosis	17,485 British ancestry cases, 331,737 British ancestry controls	17,485 British ancestry cases, 331,737 British ancestry controls	GCST90104005	Polygenic architecture and cardiovascular risk of familial combined hyperlipidemia.
rs1849209	Intrinsic epigenetic age acceleration	18	44581678	4e-13	NA	LINC01478 - SETBP1-DT	34187551	McCartney DL	Genome Biol	34,461 European ancestry individuals, 6,148 African American individuals	34,461 European ancestry individuals, 6,148 African American individuals	GCST90014302	Genome-wide association studies identify 137 genetic loci for DNA methylation biomarkers of aging.
rs10940474	Plateletcrit	5	55584873	7e-11	0.0155259	AK4P2 - SLC38A9	32888494	Vuckovic D	Cell	408,112 British individuals	408,112 British individuals	GCST90002400	The Polygenic and Monogenic Basis of Blood Traits and Diseases.
rs7922169	Primary biliary cholangitis	10	48837411	5e-08	0.106451	WDFY4	34033851	Cordell HJ	J Hepatol	8,021 European ancestry cases, 16,489 European ancestry controls, 2,495 East Asian ancestry cases, 4,283 East Asian ancestry controls	8,021 European ancestry cases, 16,489 European ancestry controls, 2,495 East Asian ancestry cases, 4,283 East Asian ancestry controls	GCST90061442	An international genome-wide meta-analysis of primary biliary cholangitis: novel risk loci and candidate drugs.
rs12429714	FEV1/FVC or irritable bowel syndrome (pleiotropy)	13	98997577	7e-09	NA	DOCK9	38102678	Jiang M	Respir Res	400,102 European ancestry individuals with FEV1/FVC measurement, 61,516 European ancestry IBS cases, 709,884 European ancestry controls	400,102 European ancestry individuals with FEV1/FVC measurement, 61,516 European ancestry IBS cases, 709,884 European ancestry controls	GCST90454182	Genetic and observational associations of lung function with gastrointestinal tract diseases: pleiotropic and mendelian randomization analysis.
rs72924659	Alzheimer's disease or educational attainment (pleiotropy)	11	60335912	5e-12	58.9558	MS4A6E	34743297	Kulminski AM	Geroscience	(see Lambert 2013 and Okbay 2016)	(see Lambert 2013 and Okbay 2016)	GCST90095190	Pleiotropic predisposition to Alzheimer's disease and educational attainment: insights from the summary statistics analysis.
rs11611512	Serum alkaline phosphatase levels	12	111280578	4e-09	0.0471	CUX2	33462484	Sinnott-Armstrong N	Nat Genet	342,535 European ancestry individuals, 6,019 African ancestry individuals, 7,337 South Asian ancestry individuals	342,535 European ancestry individuals, 6,019 African ancestry individuals, 7,337 South Asian ancestry individuals	GCST90019494	Genetics of 35 blood and urine biomarkers in the UK Biobank.
rs78524350	Femur bone mineral density x serum urate levels interaction	17	60061944	3e-08	1.34421	HEATR6	34046847	Yao Y	Endocrine	2,225 men, 2,350 women	2,225 men, 2,350 women	GCST012490	Evaluate the effects of serum urate level on bone mineral density: a genome-wide gene-environment interaction analysis in UK Biobank cohort.
rs692503	Platelet count during postpartum period	9	4745675	6e-10	0.1171	AK3 - ECM1P1	38064665	Yang Z	Blood	34,457 Chinese ancestry individuals	34,457 Chinese ancestry individuals	GCST90302228	Genetic Basis of Altered Platelet Counts and Gestational Thrombocytopenia in Pregnancy.
rs10493945	Platelet-to-lymphocyte ratio	1	101300369	5e-08	NA	PPIAP7 - LINC01307	34469753	Kachuri L	Am J Hum Genet	335,030 European ancestry, NR ancestry individuals	335,030 European ancestry, NR ancestry individuals	GCST90085818	Genetic determinants of blood-cell traits influence susceptibility to childhood acute lymphoblastic leukemia.
rs1884352	Positive affect	1	8477229	1e-11	0.00797125	RERE	30643256	Baselmans BML	Nat Genet	410,603 European ancestry individuals	410,603 European ancestry individuals	GCST007338	Multivariate genome-wide analyses of the well-being spectrum.
rs17602729	Serum creatinine levels	1	114693436	2e-12	0.0203	AMPD1	34594039	Sakaue S	Nat Genet	344,104 European ancestry individuals, 150,266 East Asian ancestry individuals	344,104 European ancestry individuals, 150,266 East Asian ancestry individuals	GCST90018979	A cross-population atlas of genetic associations for 220 human phenotypes.
rs117145318	Schizophrenia	12	109791629	2e-09	0.8781	TRPV4	35396580	Trubetskoy V	Nature	53,386 European ancestry cases, 77,258 European ancestry controls, 14,004 East Asian ancestry cases, 16,757 East Asian ancestry controls, 6,152 African American cases, 3,918 African American controls, 1,234 Latino cases, 3,090 Latino controls	53,386 European ancestry cases, 77,258 European ancestry controls, 14,004 East Asian ancestry cases, 16,757 East Asian ancestry controls, 6,152 African American cases, 3,918 African American controls, 1,234 Latino cases, 3,090 Latino controls	GCST90128471	Mapping genomic loci implicates genes and synaptic biology in schizophrenia.
rs10415392	Alzheimer’s disease polygenic risk score (upper quantile vs lower quantile)	19	45216532	2e-42	NA	EXOC3L2, BLOC1S3, MARK4	35589863	Gouveia C	Sci Rep	18,892 European ancestry high risk individuals, 18,892 European ancestry low risk individuals	18,892 European ancestry high risk individuals, 18,892 European ancestry low risk individuals	GCST90132260	Genome-wide association of polygenic risk extremes for Alzheimer's disease in the UK Biobank.
rs2517898	Insomnia	6	29831969	7e-09	0.006	HLA-G - POLR1HASP	35835914	Watanabe K	Nat Genet	593,724 European ancestry cases, 1,771,286 European ancestry controls	593,724 European ancestry cases, 1,771,286 European ancestry controls	GCST90131901	Genome-wide meta-analysis of insomnia prioritizes genes associated with metabolic and psychiatric pathways.
rs10049210	Varicose veins	3	157079584	2e-08	0.0808	LINC00880	36653477	Helkkula P	Commun Biol	17,027 Finnish ancestry cases, 190,028 Finnish ancestry controls	17,027 Finnish ancestry cases, 190,028 Finnish ancestry controls	GCST90246234	Genome-wide association study of varicose veins identifies a protective missense variant in GJD3 enriched in the Finnish population.
rs11067612	Systolic blood pressure	12	115477978	7e-18	0.2282	TBX3-AS1 - UBA52P7	38689001	Keaton JM	Nat Genet	1,028,980 European ancestry individuals	1,028,980 European ancestry individuals	GCST90310294	Genome-wide analysis in over 1 million individuals of European ancestry yields improved polygenic risk scores for blood pressure traits.
rs12478126	Crohn's disease	2	28423081	3e-16	0.1051	FOSL2 - PLB1	37156999	Liu Z	Nat Genet	7,372 East Asian ancestry cases, 15,456 East Asian ancestry controls, 13,501 European ancestry cases, 331,263 European ancestry controls	7,372 East Asian ancestry cases, 15,456 East Asian ancestry controls, 13,501 European ancestry cases, 331,263 European ancestry controls	GCST90446792	Genetic architecture of the inflammatory bowel diseases across East Asian and European ancestries.
rs140489	Mean corpuscular volume	22	21567005	4e-16	0.057	UBE2L3	39414775	Jacobs BM	Nat Commun	38,000 South Asian ancestry individuals	38,000 South Asian ancestry individuals	GCST90448619	Genetic architecture of routinely acquired blood tests in a British South Asian cohort.
rs9356996	Calcium levels	6	26008259	5e-12	0.0166	LINC02980	34594039	Sakaue S	Nat Genet	315,153 European ancestry individuals, 83,980 East Asian ancestry individuals	315,153 European ancestry individuals, 83,980 East Asian ancestry individuals	GCST90018951	A cross-population atlas of genetic associations for 220 human phenotypes.
rs4844565	Lactate levels	1	207053793	3e-13	0.0323	PFKFB2	38448586	Karjalainen MK	Nature	4,435 East Asian ancestry individuals, 11,340 South Asian ancestry individuals, 120,241 European ancestry individuals	4,435 East Asian ancestry individuals, 11,340 South Asian ancestry individuals, 120,241 European ancestry individuals	GCST90301990	Genome-wide characterization of circulating metabolic biomarkers.
rs4849183	Other disorders of testis (PheCode 603)	2	113234797	8e-27	0.1727	PAX8, PAX8-AS1	39024449	Verma A	Science	7,963 European ancestry cases, 401,936 European ancestry controls	7,963 European ancestry cases, 401,936 European ancestry controls	GCST90476156	Diversity and scale: Genetic architecture of 2068 traits in the VA Million Veteran Program.
rs7564469	Glucose (fasting status unknown, maximum, inv-norm transformed)	2	144500878	1e-13	0.02547	ZEB2	39024449	Verma A	Science	419,671 European ancestry individuals	419,671 European ancestry individuals	GCST90475329	Diversity and scale: Genetic architecture of 2068 traits in the VA Million Veteran Program.
rs2875974	COVID-19 (hospitalized covid vs population)	8	60507169	7e-10	1.1	LINC01301	37198478	Pairo-Castineira E	Nature	763 African ancestry cases, 24,850 African ancestry controls, 218 admixed American ancestry cases, 94,318 admixed American ancestry controls, 414 East Asian ancestry cases, 816 East Asian ancestry controls, 16,627 European ancestry cases, 749,207 European ancestry controls, 3,533 European, African or admixed American ancestry cases, 1,700 European, African or admixed American ancestry controls, 1…	763 African ancestry cases, 24,850 African ancestry controls, 218 admixed American ancestry cases, 94,318 admixed American ancestry controls, 414 East Asian ancestry cases, 816 East Asian ancestry controls, 16,627 European ancestry cases, 749,207 European ancestry controls, 3,533 European, African or admixed American ancestry cases, 1,700 European, African or admixed American ancestry controls, 1…	GCST90270935	GWAS and meta-analysis identifies 49 genetic variants underlying critical COVID-19.
rs164515	Arachidoylcarnitine (C20) levels	5	141955933	1e-11	0.11558	PCDH12	36635386	Chen Y	Nat Genet	7,682 European ancestry individuals	7,682 European ancestry individuals	GCST90200135	Genomic atlas of the plasma metabolome prioritizes metabolites implicated in human diseases.
rs78708399	CXCL10 levels	4	74128614	3e-11	0.426671	MTHFD2L	28915241	Ahsan M	PLoS Genet	953 individuals	953 individuals	GCST90274886	The relative contribution of DNA methylation and genetic variants on protein biomarkers for human diseases.
rs1288694	Fasting glucose levels x carbohydrate intake interaction (2df)	3	71275429	5e-08	NA	FOXP1	36791419	Westerman KE	Diabetes	4,328 African American individuals, 35 American Indian ancestry individuals, 122 Asian ancestry individuals, 18,214 European ancestry individuals, 7,084 Hispanic or Latin American individuals	4,328 African American individuals, 35 American Indian ancestry individuals, 122 Asian ancestry individuals, 18,214 European ancestry individuals, 7,084 Hispanic or Latin American individuals	GCST90271344	Investigating gene-diet interactions impacting the association between macronutrient intake and glycemic traits.
rs7622417	Coronary artery disease	3	141907157	1e-09	0.0231	ATP1B3	35915156	Tcheandjieu C	Nat Med	190,493 European ancestry cases, 582,775 European ancestry controls, 6,378 Hispanic or Latin American cases, 24,270 Hispanic or Latin American controls, 1,702 African American or Afro-Caribbean cases, 59,507 African American or Afro-Caribbean controls, 29,319 East Asian ancestry cases, 183,134 East Asian ancestry controls	190,493 European ancestry cases, 582,775 European ancestry controls, 6,378 Hispanic or Latin American cases, 24,270 Hispanic or Latin American controls, 1,702 African American or Afro-Caribbean cases, 59,507 African American or Afro-Caribbean controls, 29,319 East Asian ancestry cases, 183,134 East Asian ancestry controls	GCST90132305	Large-scale genome-wide association study of coronary artery disease in genetically diverse populations.
rs11993347	Skull bone mineral density	8	102906862	2e-12	0.059	MAILR	37402774	Medina-Gomez C	Commun Biol	38,435 European ancestry individuals, 5,397 individuals	38,435 European ancestry individuals, 5,397 individuals	GCST90310280	Bone mineral density loci specific to the skull portray potential pleiotropic effects on craniosynostosis.
rs2853951	Visceral adipose tissue volumes to gluteofemoral adipose tissue volumes ratio	6	31268338	4e-12	0.05	HCG27 - HLA-C	35773277	Agrawal S	Nat Commun	38,965 European ancestry, East Asian ancestry, South Asian ancestry, African ancestry, NR ancestry individuals	38,965 European ancestry, East Asian ancestry, South Asian ancestry, African ancestry, NR ancestry individuals	GCST90205207	Inherited basis of visceral, abdominal subcutaneous and gluteofemoral fat depots.
rs117990130	Skin reflectance	16	89720932	8e-30	0.012	ZNF276	36536295	Vollenbrock CE	BMC Genomics	27,254 European ancestry individuals	27,254 European ancestry individuals	GCST90246327	Genome-wide association study identifies novel loci associated with skin autofluorescence in individuals without diabetes.
rs421602	Triglyceride levels	6	32140585	3e-07	5.732	FKBPL - PRRT1	35884923	Lee SB	Biomedicines	58,701 Korean ancestry individuals	58,701 Korean ancestry individuals	GCST90134521	Dyslipidaemia-Genotype Interactions with Nutrient Intake and Cerebro-Cardiovascular Disease.
rs10925024	C-reactive protein levels (MTAG)	1	247435723	5e-17	0.02316	NLRP3	36376304	Koskeridis F	Nat Commun	575,531 European ancestry individuals	575,531 European ancestry individuals	GCST90179146	Pleiotropic genetic architecture and novel loci for C-reactive protein levels.
rs6554195	High-density lipoprotein levels (MTAG)	4	54634547	4e-12	0.01829	LINC02260 - KIT	36376304	Koskeridis F	Nat Commun	361,194 European ancestry individuals	361,194 European ancestry individuals	GCST90179147	Pleiotropic genetic architecture and novel loci for C-reactive protein levels.
rs17220730	Hypothyroidism or rheumatoid arthritis (pleiotropy)	6	33029773	1e-16	NA	HLA-DOA - HLA-DPA1	38368726	Liu R	Mol Immunol	22,350 European ancestry rheumatoid arthritis cases, 51,194 European ancestry hypothyroidism cases, 518,206 European ancestry controls	22,350 European ancestry rheumatoid arthritis cases, 51,194 European ancestry hypothyroidism cases, 518,206 European ancestry controls	GCST90428109	Shared genetic architecture between hypothyroidism and rheumatoid arthritis: A large-scale cross-trait analysis.
rs4711363	Serum urate levels	6	33885171	8e-09	0.0345	LINC01016	38658550	Cho C	Nat Commun	219,768 East Asian ancestry individuals	219,768 East Asian ancestry individuals	GCST90319905	Large-scale cross-ancestry genome-wide meta-analysis of serum urate.
rs72818964	Serum uric acid levels	2	100961560	6e-09	0.0155	NPAS2	34594039	Sakaue S	Nat Genet	343,836 European ancestry individuals, 129,405 East Asian ancestry individuals	343,836 European ancestry individuals, 129,405 East Asian ancestry individuals	GCST90018977	A cross-population atlas of genetic associations for 220 human phenotypes.
rs12226331	Migraine	11	102200245	2e-13	1.04042	YAP1	35115687	Hautakangas H	Nat Genet	102,084 European ancestry cases, 771,257 European ancestry controls	102,084 European ancestry cases, 771,257 European ancestry controls	GCST90102553	Genome-wide analysis of 102,084 migraine cases identifies 123 risk loci and subtype-specific risk alleles.
rs139986706	Anxiety severity x hours spent watching television interaction	17	40369664	2e-07	1.22357	PPIAP54 - RNA5SP441	34877740	Ye J	Addict Biol	488,377 British ancestry individuals	488,377 British ancestry individuals	GCST90101749	Associations between electronic devices use and common mental traits: A gene-environment interaction model using the UK Biobank data.
rs182923402	Anterior amygdaloid area volume	9	95537395	3e-10	0.7323	PTCH1 - ERCC6L2-AS1	37391117	Mufford MS	Biol Psychiatry	35,292 European ancestry individuals, 227 African ancestry individuals, 380 South Asian ancestry individuals, 115 East Asian ancestry individuals, 338 individuals	35,292 European ancestry individuals, 227 African ancestry individuals, 380 South Asian ancestry individuals, 115 East Asian ancestry individuals, 338 individuals	GCST90310230	The Genetic Architecture of Amygdala Nuclei.
rs149161616	acne vulgaris	22	24271081	7e-07	1.13	SPECC1L, SPECC1L-ADORA2A	36922633	Teder-Laving M	Eur J Hum Genet	34,422 European ancestry cases, 364,991 European ancestry controls	34,422 European ancestry cases, 364,991 European ancestry controls	GCST90245818	Genome-wide meta-analysis identifies novel loci conferring risk of acne vulgaris.
rs12794032	platelet count (minimum, inv-norm transformed)	11	69149433	8e-15	0.02827	TPCN2 - SMIM38	39024449	Verma A	Science	114,799 African American or Afro-Caribbean individuals, 55,776 Hispanic or Latin American individuals, 5,949 East Asian ancestry individuals, 407,168 European ancestry individuals	114,799 African American or Afro-Caribbean individuals, 55,776 Hispanic or Latin American individuals, 5,949 East Asian ancestry individuals, 407,168 European ancestry individuals	GCST90480652	Diversity and scale: Genetic architecture of 2068 traits in the VA Million Veteran Program.
rs1752166	Height	9	123796564	1e-22	0.008	DENND1A	36224396	Yengo L	Nature	5,314,291 European ancestry, Hispanic or Latin American, East Asian ancestry, African ancestry, South Asian ancestry individuals	5,314,291 European ancestry, Hispanic or Latin American, East Asian ancestry, African ancestry, South Asian ancestry individuals	GCST90245848	A saturated map of common genetic variants associated with human height.
rs941969	Height	6	52524077	4e-08	0.01712	TRAM2, EFHC1	36224396	Yengo L	Nature	293,593 African ancestry individuals	293,593 African ancestry individuals	GCST90245846	A saturated map of common genetic variants associated with human height.
rs13248936	Height	8	30458646	2e-162	0.0168	RBPMS	36224396	Yengo L	Nature	5,314,291 European ancestry, Hispanic or Latin American, East Asian ancestry, African ancestry, South Asian ancestry individuals	5,314,291 European ancestry, Hispanic or Latin American, East Asian ancestry, African ancestry, South Asian ancestry individuals	GCST90245848	A saturated map of common genetic variants associated with human height.
rs4821544	Atopic dermatitis	22	36862461	6e-06	1.09	NCF4, NCF4-AS1	22197932	Paternoster L	Nat Genet	5,606 European ancestry cases, 20,565 European ancestry controls	5,606 European ancestry cases, 20,565 European ancestry controls	GCST001363	Meta-analysis of genome-wide association studies identifies three new risk loci for atopic dermatitis.
rs1801274	Ulcerative colitis	1	161509955	2e-20	1.21	FCGR2A	21297633	Anderson CA	Nat Genet	6,687 European ancestry cases, 19,718 European ancestry controls	6,687 European ancestry cases, 19,718 European ancestry controls	GCST000964	Meta-analysis identifies 29 additional ulcerative colitis risk loci, increasing the number of confirmed associations to 47.
rs1635852	Height	7	28149792	9e-10	0.25	JAZF1	18952825	Johansson A	Hum Mol Genet	3,925 European ancestry individuals	3,925 European ancestry individuals	GCST000254	Common variants in the JAZF1 gene associated with height identified by linkage and genome-wide association analysis.
rs1799964	Crohn's disease	6	31574531	4e-11	1.19	LTA - TNF	21102463	Franke A	Nat Genet	6,333 European ancestry cases, 15,056 European ancestry controls	6,333 European ancestry cases, 15,056 European ancestry controls	GCST000879	Genome-wide meta-analysis increases to 71 the number of confirmed Crohn's disease susceptibility loci.
rs6993770	Platelet count	8	105569300	4e-17	3.668	ZFPM2-AS1, ZFPM2	22139419	Gieger C	Nature	38,891 European ancestry individuals, 1,661 Val Borbera (founder/genetic isolate) individuals, 521 Carlantino (founder/genetic isolate) individuals, 1,198 Friuli Venezia Giulia (founder/genetic isolate) individuals, 1,213 South Tyrolean (founder/genetic isolate) individuals, 890 Sorbian (founder/genetic isolate) individuals, 4,292 Sardinian (founder/genetic isolate) individuals	38,891 European ancestry individuals, 1,661 Val Borbera (founder/genetic isolate) individuals, 521 Carlantino (founder/genetic isolate) individuals, 1,198 Friuli Venezia Giulia (founder/genetic isolate) individuals, 1,213 South Tyrolean (founder/genetic isolate) individuals, 890 Sorbian (founder/genetic isolate) individuals, 4,292 Sardinian (founder/genetic isolate) individuals	GCST001337	New gene functions in megakaryopoiesis and platelet formation.
rs3181077	Narcolepsy with cataplexy	3	46209161	6e-06	1.63	CCR3	25986216	Toyoda H	Brain Behav Immun	409 Japanese ancestry cases, 1,562 Japanese ancestry controls	409 Japanese ancestry cases, 1,562 Japanese ancestry controls	GCST002912	A polymorphism in CCR1/CCR3 is associated with narcolepsy.
rs56043070	Plateletcrit	1	247556467	4e-43	0.0974617	GCSAML	27863252	Astle WJ	Cell	164,339 European ancestry individuals	164,339 European ancestry individuals	GCST004607	The Allelic Landscape of Human Blood Cell Trait Variation and Links to Common Complex Disease.
rs35979828	Mean corpuscular volume	12	54292096	2e-18	0.0604806	HNRNPA1 - NFE2	27863252	Astle WJ	Cell	172,433 European ancestry individuals	172,433 European ancestry individuals	GCST004602	The Allelic Landscape of Human Blood Cell Trait Variation and Links to Common Complex Disease.
rs72697295	Post bronchodilator FEV1/FVC ratio	14	92603635	1e-07	0.014	RIN3	26634245	Lutz SM	BMC Genet	10,094 European ancestry current and former smoker individuals, 3,260 African American current and former smoker individuals, 178 current and former smoker individuals	10,094 European ancestry current and former smoker individuals, 3,260 African American current and former smoker individuals, 178 current and former smoker individuals	GCST003264	A genome-wide association study identifies risk loci for spirometric measures among smokers of European and African ancestry.
rs11741255	Pediatric autoimmune diseases	5	132475490	2e-09	NA	CARINH, IRF1	26301688	Li YR	Nat Med	97 European ancestry thyroiditis cases, 107 European ancestry ankylosing spondylitis cases, 100 European ancestry psoriasis cases, 173 European ancestry celiac disease cases, 254 European ancestry systemic lupus erythematosus cases, 308 European ancestry common variable inmunodeficiency cases, 865 European ancestry ulcerative colitis cases, 1,086 European ancestry Type 1 diabetes cases, 1,123 Eur…	97 European ancestry thyroiditis cases, 107 European ancestry ankylosing spondylitis cases, 100 European ancestry psoriasis cases, 173 European ancestry celiac disease cases, 254 European ancestry systemic lupus erythematosus cases, 308 European ancestry common variable inmunodeficiency cases, 865 European ancestry ulcerative colitis cases, 1,086 European ancestry Type 1 diabetes cases, 1,123 Eur…	GCST003097	Meta-analysis of shared genetic architecture across ten pediatric autoimmune diseases.
rs80109907	Granulocyte percentage of myeloid white cells	21	38479032	3e-09	0.108482	ERG	27863252	Astle WJ	Cell	169,545 European ancestry individuals	169,545 European ancestry individuals	GCST004608	The Allelic Landscape of Human Blood Cell Trait Variation and Links to Common Complex Disease.
rs762679	Mean corpuscular volume	8	47972876	4e-12	0.0346791	MCM4	27863252	Astle WJ	Cell	172,433 European ancestry individuals	172,433 European ancestry individuals	GCST004602	The Allelic Landscape of Human Blood Cell Trait Variation and Links to Common Complex Disease.
rs118013485	Asthma	19	33235671	9e-28	NA	SLC7A10 - CEBPA	32296059	Han Y	Nat Commun	84,492 European ancestry cases, 2,149 African American cases, 606 Hispanic cases, 1,239 Japanese ancestry cases, 437,036 European ancestry controls, 6,055 African American controls, 792 Hispanic controls, 3,976 Japanese ancestry controls	84,492 European ancestry cases, 2,149 African American cases, 606 Hispanic cases, 1,239 Japanese ancestry cases, 437,036 European ancestry controls, 6,055 African American controls, 792 Hispanic controls, 3,976 Japanese ancestry controls	GCST010043	Genome-wide analysis highlights contribution of immune system pathways to the genetic architecture of asthma.
rs11710737	General cognitive ability	3	107745323	6e-06	4.513	BBX	29844566	Davies G	Nat Commun	up to 300,486 European ancestry individuals	up to 300,486 European ancestry individuals	GCST006269	Study of 300,486 individuals identifies 148 independent genetic loci influencing general cognitive function.
rs35045014	Mean corpuscular hemoglobin	6	107110953	9e-13	NA	BEND3	30595370	Kichaev G	Am J Hum Genet	approximately 443,000 European ancestry individuals	approximately 443,000 European ancestry individuals	GCST007068	Leveraging Polygenic Functional Enrichment to Improve GWAS Power.
rs2112801	Waist-to-hip ratio adjusted for BMI	19	33267843	2e-08	NA	SLC7A10 - CEBPA	31669095	Zhu Z	J Allergy Clin Immunol	457,690 European ancestry individuals	457,690 European ancestry individuals	GCST009858	Shared Genetic and Experimental Links between Obesity-Related Traits and Asthma Subtypes in UK Biobank.
rs59107033	Mean corpuscular volume	3	123386796	6e-10	0.0151662	ADCY5	32888494	Vuckovic D	Cell	408,112 British individuals	408,112 British individuals	GCST90002392	The Polygenic and Monogenic Basis of Blood Traits and Diseases.
rs11554159	Multiple sclerosis	19	18175134	2e-24	1.15	IFI30	24076602	Beecham AH	Nat Genet	14,498 European ancestry cases, 24,091 European ancestry controls	14,498 European ancestry cases, 24,091 European ancestry controls	GCST005531	Analysis of immune-related loci identifies 48 new susceptibility variants for multiple sclerosis.
rs79070372	Intrinsic epigenetic age acceleration	3	128510481	6e-09	0.5054	GATA2-AS1	31738745	Gibson J	PLoS Genet	13,493 European ancestry individuals	13,493 European ancestry individuals	GCST009604	A meta-analysis of genome-wide association studies of epigenetic age acceleration.
rs16989483	Height	20	44908559	2e-25	NA	YWHAB - PABPC1L	30595370	Kichaev G	Am J Hum Genet	approximately 458,000 European ancestry individuals	approximately 458,000 European ancestry individuals	GCST007841	Leveraging Polygenic Functional Enrichment to Improve GWAS Power.
rs1633768	Myeloproliferative neoplasms	9	133003751	1e-09	1.2	GFI1B - EEF1A1P5	33057200	Bao EL	Nature	1,086 British ancestry cases, 407,155 British ancestry controls, 640 Finnish ancestry cases, 176,259 Finnish ancestry controls	1,086 British ancestry cases, 407,155 British ancestry controls, 640 Finnish ancestry cases, 176,259 Finnish ancestry controls	GCST90000032	Inherited myeloproliferative neoplasm risk affects haematopoietic stem cells.
rs72786903	Brain morphology (MOSTest)	10	49168349	8e-19	NA	TMEM273	32665545	van der Meer D	Nat Commun	26,502 European ancestry individuals	26,502 European ancestry individuals	GCST010703	Understanding the genetic determinants of the brain with MOSTest.
rs47340	Plateletcrit	22	43166823	1e-14	0.0178863	TTLL12	32888494	Vuckovic D	Cell	408,112 British individuals	408,112 British individuals	GCST90002400	The Polygenic and Monogenic Basis of Blood Traits and Diseases.
rs903504	Liver enzyme levels (alkaline phosphatase)	17	39673317	3e-56	0.00378397	PGAP3	33972514	Pazoki R	Nat Commun	437,438 European ancestry individuals	437,438 European ancestry individuals	GCST90013406	Genetic analysis in European ancestry individuals identifies 517 loci associated with liver enzymes.
rs3857286	Glycated hemoglobin levels	5	55567362	3e-09	0.0159	AK4P2 - SLC38A9	33462484	Sinnott-Armstrong N	Nat Genet	327,177 European ancestry individuals, 4,847 African ancestry individuals, 6,895 South Asian ancestry individuals	327,177 European ancestry individuals, 4,847 African ancestry individuals, 6,895 South Asian ancestry individuals	GCST90019509	Genetics of 35 blood and urine biomarkers in the UK Biobank.
rs588485	Phosphatidylinositol (37:6) levels	1	20589951	8e-15	0.181	CDA	35668104	Cadby G	Nat Commun	4,492 European ancestry individuals	4,492 European ancestry individuals	GCST90024475	Comprehensive genetic analysis of the human lipidome identifies loci associated with lipid homeostasis with links to coronary artery disease.
rs7246562	Number of awakenings in broad depression	19	33055182	3e-07	0.01	RHPN2	36463630	Melhuish Beaupre LM	J Psychiatr Res	13,657 European ancestry individuals	13,657 European ancestry individuals	GCST90244784	Association analyses of the autosomal genome and mitochondrial DNA with accelerometry-derived sleep parameters in depressed UK biobank subjects.
rs1473698	Lactate levels	20	8649160	5e-09	0.0247335	PLCB1	35213538	Richardson TG	PLoS Biol	114,806 European ancestry individuals	114,806 European ancestry individuals	GCST90092882	Characterising metabolomic signatures of lipid-modifying therapies through drug target mendelian randomisation.
rs527210	Myocardial infarction	9	133271001	5e-13	0.0718	ABO	34594039	Sakaue S	Nat Genet	20,917 European ancestry cases, 440,906 European ancestry controls, 14,992 East Asian ancestry cases, 146,214 East Asian ancestry controls	20,917 European ancestry cases, 440,906 European ancestry controls, 14,992 East Asian ancestry cases, 146,214 East Asian ancestry controls	GCST90018877	A cross-population atlas of genetic associations for 220 human phenotypes.
rs2303969	Educational attainment	11	72825227	1e-09	0.00675382	ATG16L2	35361970	Okbay A	Nat Genet	3,037,499 European ancestry individuals	3,037,499 European ancestry individuals	GCST90105038	Polygenic prediction of educational attainment within and between families from genome-wide association analyses in 3 million individuals.
rs4503179	Mean corpuscular volume	9	21950880	8e-09	0.0135	MTAP - CDKN2A-AS1	34594039	Sakaue S	Nat Genet	350,473 European ancestry individuals, 129,832 East Asian ancestry individuals	350,473 European ancestry individuals, 129,832 East Asian ancestry individuals	GCST90018966	A cross-population atlas of genetic associations for 220 human phenotypes.
rs2519093	Venous thromboembolism	9	133266456	8e-16	1.69	ABO	22672568	Heit JA	J Thromb Haemost	1,503 European and other ancestry cases, 1,459 European and other ancestry controls	1,503 European and other ancestry cases, 1,459 European and other ancestry controls	GCST001557	A genome-wide association study of venous thromboembolism identifies risk variants in chromosomes 1q24.2 and 9q.
rs203707	Alzheimer's disease (MTAG)	19	44654221	4e-09	0.00967233	PVR, CEACAM16-AS1	39537608	Koskeridis F	Nat Commun	at least 71,880 European ancestry cases, at least 383,378 European ancestry controls (MTAG boosted by 446,696 stroke samples)	at least 71,880 European ancestry cases, at least 383,378 European ancestry controls (MTAG boosted by 446,696 stroke samples)	GCST90449062	Multi-trait association analysis reveals shared genetic loci between Alzheimer's disease and cardiovascular traits.
rs9271526	Seropositivity for coxsackievirus peptide (twist_47443)	6	32622085	1e-09	6.103	HLA-DRB1 - HLA-DQA1	37164013	Andreu-Sanchez S	Immunity	1,745 individuals	1,745 individuals	GCST90293681	Phage display sequencing reveals that genetic, environmental, and intrinsic factors influence variation of human antibody epitope repertoire.
rs12276833	Urine homocarnosine levels in chronic kidney disease	11	67390918	4e-22	0.365	RAD9A	37277652	Schlosser P	Nat Genet	4,312 European ancestry individuals	4,312 European ancestry individuals	GCST90265347	Genetic studies of paired metabolomes reveal enzymatic and transport processes at the interface of plasma and urine.
rs837763	Mean corpuscular hemoglobin concentration	16	88787321	4e-13	0.088	PIEZO1 - CDT1	20139978	Kamatani Y	Nat Genet	14,377 Japanese ancestry individuals	14,377 Japanese ancestry individuals	GCST000582	Genome-wide association study of hematological and biochemical traits in a Japanese population.
rs964184	Response to Vitamin E supplementation	11	116778201	3e-12	0.07	ZPR1	22437554	Major JM	J Nutr	2,112 European ancestry individuals	2,112 European ancestry individuals	GCST001450	Genome-wide association study identifies three common variants associated with serologic response to vitamin E supplementation in men.
rs11057841	Lipoprotein-associated phospholipase A2 activity and mass	12	124832197	6e-14	0.0286	SCARB1	23118302	Chu AY	Circ Cardiovasc Genet	6,851 European ancestry individuals	6,851 European ancestry individuals	GCST001727	Genome-wide association study evaluating lipoprotein-associated phospholipase A2 mass and activity at baseline and after rosuvastatin therapy.
rs4712652	Obesity	6	22078386	3e-07	1.2	CASC15	19151714	Meyre D	Nat Genet	695 European ancestry adult cases, 731 European ancestry adult controls, 685 European ancestry child cases, 685 European ancestry child controls	695 European ancestry adult cases, 731 European ancestry adult controls, 685 European ancestry child cases, 685 European ancestry child controls	GCST000317	Genome-wide association study for early-onset and morbid adult obesity identifies three new risk loci in European populations.
rs900400	Birth weight	3	157080986	2e-35	0.09	LINC00880	20372150	Freathy RM	Nat Genet	10,623 European ancestry individuals	10,623 European ancestry individuals	GCST000648	Variants in ADCY5 and near CCNL1 are associated with fetal growth and birth weight.
rs190982	Alzheimer's disease (late onset)	5	88927603	3e-08	1.0753	MEF2C-AS1	24162737	Lambert JC	Nat Genet	17,008 European ancestry cases, 37,154 European ancestry controls	17,008 European ancestry cases, 37,154 European ancestry controls	GCST002245	Meta-analysis of 74,046 individuals identifies 11 new susceptibility loci for Alzheimer's disease.
rs11190141	Crohn's disease	10	99532633	5e-07	1.34	LINC01475	22412388	Kenny EE	PLoS Genet	737 Ashkenazi Jewish cases, 2,257 Ashkenazi Jewish controls	737 Ashkenazi Jewish cases, 2,257 Ashkenazi Jewish controls	GCST001438	A genome-wide scan of Ashkenazi Jewish Crohn's disease suggests novel susceptibility loci.
rs2277339	Menopause (age at onset)	12	56752285	2e-19	0.38	PRIM1, HSD17B6	22267201	Stolk L	Nat Genet	38,968 European ancestry female individuals	38,968 European ancestry female individuals	GCST001381	Meta-analyses identify 13 loci associated with age at menopause and highlight DNA repair and immune pathways.
rs3731211	Platelet count	9	21986848	6e-14	3.281	CDKN2A	22139419	Gieger C	Nature	38,891 European ancestry individuals, 1,661 Val Borbera (founder/genetic isolate) individuals, 521 Carlantino (founder/genetic isolate) individuals, 1,198 Friuli Venezia Giulia (founder/genetic isolate) individuals, 1,213 South Tyrolean (founder/genetic isolate) individuals, 890 Sorbian (founder/genetic isolate) individuals, 4,292 Sardinian (founder/genetic isolate) individuals	38,891 European ancestry individuals, 1,661 Val Borbera (founder/genetic isolate) individuals, 521 Carlantino (founder/genetic isolate) individuals, 1,198 Friuli Venezia Giulia (founder/genetic isolate) individuals, 1,213 South Tyrolean (founder/genetic isolate) individuals, 890 Sorbian (founder/genetic isolate) individuals, 4,292 Sardinian (founder/genetic isolate) individuals	GCST001337	New gene functions in megakaryopoiesis and platelet formation.
rs2945412	Crohn's disease	17	27516617	9e-17	1.137	KSR1	23128233	Jostins L	Nature	Up to 12,924 European ancestry cases, up to 21,442 European ancestry controls	Up to 12,924 European ancestry cases, up to 21,442 European ancestry controls	GCST001729	Host-microbe interactions have shaped the genetic architecture of inflammatory bowel disease.
rs913678	Inflammatory bowel disease	20	50338887	5e-08	1.056	LINC01271 - RN7SL636P	23128233	Jostins L	Nature	12,924 European ancestry cases, 21,442 European ancestry controls	12,924 European ancestry cases, 21,442 European ancestry controls	GCST001725	Host-microbe interactions have shaped the genetic architecture of inflammatory bowel disease.
rs754388	Local histogram emphysema pattern	14	92649065	2e-07	NA	RIN3	25006744	Castaldi PJ	Am J Respir Crit Care Med	3,732 European ancestry smoker individuals, 2,724 European ancestry chronic obstructive pulmonary disease smoker cases, 2,372 African American smoker individuals, 786 African American chronic obstructive pulmonary disease smoker cases	3,732 European ancestry smoker individuals, 2,724 European ancestry chronic obstructive pulmonary disease smoker cases, 2,372 African American smoker individuals, 786 African American chronic obstructive pulmonary disease smoker cases	GCST002525	Genome-wide association identifies regulatory Loci associated with distinct local histogram emphysema patterns.
rs1967309	Response to Dalcetrapib treatment in acute coronary syndrome	16	4015582	2e-08	1.54	ADCY9	25583994	Tardif JC	Circ Cardiovasc Genet	2,845 European ancestry individuals	2,845 European ancestry individuals	GCST002747	Pharmacogenomic determinants of the cardiovascular effects of dalcetrapib.
rs3806624	Rheumatoid arthritis	3	27723132	3e-08	1.08	EOMES - LINC01980	24390342	Okada Y	Nature	up to 14,361 European ancestry cases, up to 42,923 European ancestry controls, up to 4,873 East Asian ancestry cases, up to 17,642 East Asian ancestry controls	up to 14,361 European ancestry cases, up to 42,923 European ancestry controls, up to 4,873 East Asian ancestry cases, up to 17,642 East Asian ancestry controls	GCST002318	Genetics of rheumatoid arthritis contributes to biology and drug discovery.
rs391023	Chronic lymphocytic leukemia	16	85894208	5e-17	1.33	RPL10AP12 - IRF8	23770605	Berndt SI	Nat Genet	2,179 European ancestry cases, 6,221 European ancestry controls	2,179 European ancestry cases, 6,221 European ancestry controls	GCST002073	Genome-wide association study identifies multiple risk loci for chronic lymphocytic leukemia.
rs61352607	Triglycerides	12	57445390	1e-08	0.038	INHBC	25961943	Surakka I	Nat Genet	up to 62,166 European ancestry individuals	up to 62,166 European ancestry individuals	GCST002897	The impact of low-frequency and rare variants on lipid levels.
rs7097656	Inflammatory bowel disease	10	80491075	1e-15	1.10444	TSPAN14	26192919	Liu JZ	Nat Genet	12,882 European ancestry cases, 21,770 European ancestry controls	12,882 European ancestry cases, 21,770 European ancestry controls	GCST003043	Association analyses identify 38 susceptibility loci for inflammatory bowel disease and highlight shared genetic risk across populations.
rs4737010	Mean corpuscular hemoglobin concentration	8	41772929	4e-62	0.0689935	ANK1	27863252	Astle WJ	Cell	172,851 European ancestry individuals	172,851 European ancestry individuals	GCST004605	The Allelic Landscape of Human Blood Cell Trait Variation and Links to Common Complex Disease.
rs2022003	Mean corpuscular hemoglobin concentration	1	158617176	2e-52	0.0586917	SPTA1	27863252	Astle WJ	Cell	172,851 European ancestry individuals	172,851 European ancestry individuals	GCST004605	The Allelic Landscape of Human Blood Cell Trait Variation and Links to Common Complex Disease.
rs9809116	Platelet count	3	72348128	1e-12	0.0264998	LINC00877 - RYBP	27863252	Astle WJ	Cell	166,066 European ancestry individuals	166,066 European ancestry individuals	GCST004603	The Allelic Landscape of Human Blood Cell Trait Variation and Links to Common Complex Disease.
rs2072732	Plateletcrit	1	3063713	1e-14	0.0361967	PRDM16-DT	27863252	Astle WJ	Cell	164,339 European ancestry individuals	164,339 European ancestry individuals	GCST004607	The Allelic Landscape of Human Blood Cell Trait Variation and Links to Common Complex Disease.
rs2836422	Mean corpuscular volume	21	38466112	5e-12	0.0253187	ERG	27863252	Astle WJ	Cell	172,433 European ancestry individuals	172,433 European ancestry individuals	GCST004602	The Allelic Landscape of Human Blood Cell Trait Variation and Links to Common Complex Disease.
rs11508026	C-reactive protein levels or triglyceride levels (pleiotropy)	16	56965416	3e-14	NA	CETP	27286809	Ligthart S	BMC Genomics	65,000 individuals (C-reactive protein), 96,598 individuals (triglycerides)	65,000 individuals (C-reactive protein), 96,598 individuals (triglycerides)	GCST003681	Bivariate genome-wide association study identifies novel pleiotropic loci for lipids and inflammation.
rs34038797	Plateletcrit	12	630843	1e-10	0.0245675	NINJ2	27863252	Astle WJ	Cell	164,339 European ancestry individuals	164,339 European ancestry individuals	GCST004607	The Allelic Landscape of Human Blood Cell Trait Variation and Links to Common Complex Disease.
rs45541434	Plateletcrit	19	55182101	5e-10	0.105206	PTPRH	27863252	Astle WJ	Cell	164,339 European ancestry individuals	164,339 European ancestry individuals	GCST004607	The Allelic Landscape of Human Blood Cell Trait Variation and Links to Common Complex Disease.
rs17731	Schizophrenia	10	3779369	2e-06	1.05	KLF6	26198764	Goes FS	Am J Med Genet B Neuropsychiatr Genet	592 Ashkenazi Jewish ancestry cases, 505 Ashkenazi Jewish ancestry controls, 36,989 cases, 113,075 controls	592 Ashkenazi Jewish ancestry cases, 505 Ashkenazi Jewish ancestry controls, 36,989 cases, 113,075 controls	GCST003048	Genome-wide association study of schizophrenia in Ashkenazi Jews.
rs56366063	Prostate cancer (advanced)	2	111146954	1e-08	1.14	BCL2L11, MIR4435-2HG	29892016	Schumacher FR	Nat Genet	15,167 European ancestry cases, 58,308 European ancestry controls	15,167 European ancestry cases, 58,308 European ancestry controls	GCST006083	Association analyses of more than 140,000 men identify 63 new prostate cancer susceptibility loci.
rs7094871	Waist-to-hip ratio adjusted for BMI	10	112952395	7e-12	NA	TCF7L2	31669095	Zhu Z	J Allergy Clin Immunol	457,690 European ancestry individuals	457,690 European ancestry individuals	GCST009858	Shared Genetic and Experimental Links between Obesity-Related Traits and Asthma Subtypes in UK Biobank.
rs2907272	Height	16	3969349	2e-34	NA	ADCY9	30595370	Kichaev G	Am J Hum Genet	approximately 458,000 European ancestry individuals	approximately 458,000 European ancestry individuals	GCST007841	Leveraging Polygenic Functional Enrichment to Improve GWAS Power.
rs117737783	Waist-hip ratio	11	69312277	6e-10	NA	MYEOV	30595370	Kichaev G	Am J Hum Genet	approximately 458,000 European ancestry individuals	approximately 458,000 European ancestry individuals	GCST007067	Leveraging Polygenic Functional Enrichment to Improve GWAS Power.
rs7766106	Cleft lip with or without cleft palate x maternal periconceptional vitamin use interaction (parent of origin effect)	6	127133993	6e-06	0.31	RSPO3	31372216	Haaland OA	F1000Res	825 European ancestry case-parent duos or trios, 1,024 Asian ancestry case-parent duos or trios, 59 case-parent duos or trios	825 European ancestry case-parent duos or trios, 1,024 Asian ancestry case-parent duos or trios, 59 case-parent duos or trios	GCST009543	A genome-wide scan of cleft lip triads identifies parent-of-origin interaction effects between ANK3 and maternal smoking, and between ARHGEF10 and alcohol consumption.
rs1772143	Reaction time	1	205830859	1e-07	0.0091791	PM20D1, PM20D1-AS1	29844566	Davies G	Nat Commun	330,069 European ancestry individuals	330,069 European ancestry individuals	GCST006268	Study of 300,486 individuals identifies 148 independent genetic loci influencing general cognitive function.
rs12325238	Waist-hip ratio	16	10887661	6e-10	NA	CIITA	30595370	Kichaev G	Am J Hum Genet	approximately 458,000 European ancestry individuals	approximately 458,000 European ancestry individuals	GCST007067	Leveraging Polygenic Functional Enrichment to Improve GWAS Power.
rs10804681	Intelligence	3	141941833	3e-08	5.545	ATP1B3 - TFDP2	29942086	Savage JE	Nat Genet	269,867 European ancestry individuals	269,867 European ancestry individuals	GCST006250	Genome-wide association meta-analysis in 269,867 individuals identifies new genetic and functional links to intelligence.
rs9816588	Hematocrit	3	37946365	3e-31	0.035976	CTDSPL	32888493	Chen MH	Cell	562,259 European ancestry individuals	562,259 European ancestry individuals	GCST90002304	Trans-ethnic and Ancestry-Specific Blood-Cell Genetics in 746,667 Individuals from 5 Global Populations.
rs11649804	Hematocrit	17	17793441	1e-10	NA	RAI1	32888493	Chen MH	Cell	737,823 African American or Afro-Caribbean, African ancestry, European ancestry, East Asian ancestry, Hispanic or Latin American and South Asian ancestry individuals	737,823 African American or Afro-Caribbean, African ancestry, European ancestry, East Asian ancestry, Hispanic or Latin American and South Asian ancestry individuals	GCST90002308	Trans-ethnic and Ancestry-Specific Blood-Cell Genetics in 746,667 Individuals from 5 Global Populations.
rs9429088	Hematocrit	1	46031828	2e-49	NA	MAST2	32888493	Chen MH	Cell	737,823 African American or Afro-Caribbean, African ancestry, European ancestry, East Asian ancestry, Hispanic or Latin American and South Asian ancestry individuals	737,823 African American or Afro-Caribbean, African ancestry, European ancestry, East Asian ancestry, Hispanic or Latin American and South Asian ancestry individuals	GCST90002308	Trans-ethnic and Ancestry-Specific Blood-Cell Genetics in 746,667 Individuals from 5 Global Populations.
rs79755767	Hematocrit	12	54304624	1e-15	NA	COPZ1	32888493	Chen MH	Cell	737,823 African American or Afro-Caribbean, African ancestry, European ancestry, East Asian ancestry, Hispanic or Latin American and South Asian ancestry individuals	737,823 African American or Afro-Caribbean, African ancestry, European ancestry, East Asian ancestry, Hispanic or Latin American and South Asian ancestry individuals	GCST90002308	Trans-ethnic and Ancestry-Specific Blood-Cell Genetics in 746,667 Individuals from 5 Global Populations.
rs77406312	Hematocrit	14	35581011	2e-20	0.030774	RALGAPA1	32888493	Chen MH	Cell	562,259 European ancestry individuals	562,259 European ancestry individuals	GCST90002304	Trans-ethnic and Ancestry-Specific Blood-Cell Genetics in 746,667 Individuals from 5 Global Populations.
rs6126017	Hematocrit	20	50477252	9e-10	0.024926	RN7SL636P - COX6CP2	32888493	Chen MH	Cell	142,940 East Asian ancestry individuals	142,940 East Asian ancestry individuals	GCST90002305	Trans-ethnic and Ancestry-Specific Blood-Cell Genetics in 746,667 Individuals from 5 Global Populations.
rs72966926	Mean corpuscular hemoglobin	18	59661164	6e-18	NA	CCBE1	30595370	Kichaev G	Am J Hum Genet	approximately 443,000 European ancestry individuals	approximately 443,000 European ancestry individuals	GCST007068	Leveraging Polygenic Functional Enrichment to Improve GWAS Power.
rs869785	Mean corpuscular hemoglobin	3	24306309	2e-211	0.063355	THRB-AS2, THRB	32888493	Chen MH	Cell	486,823 European ancestry individuals	486,823 European ancestry individuals	GCST90002322	Trans-ethnic and Ancestry-Specific Blood-Cell Genetics in 746,667 Individuals from 5 Global Populations.
rs11229575	Height	11	58669855	1e-08	NA	GLYAT	30595370	Kichaev G	Am J Hum Genet	approximately 458,000 European ancestry individuals	approximately 458,000 European ancestry individuals	GCST007841	Leveraging Polygenic Functional Enrichment to Improve GWAS Power.
rs157595	Serum 25-Hydroxyvitamin D levels	19	44922203	3e-14	0.015581	APOC1 - APOC1P1	32059762	Manousaki D	Am J Hum Genet	443,734 European ancestry individuals	443,734 European ancestry individuals	GCST010144	Genome-wide Association Study for Vitamin D Levels Reveals 69 Independent Loci.
rs28722705	Red blood cell count	5	56158115	3e-08	NA	ANKRD55	30595370	Kichaev G	Am J Hum Genet	approximately 445,000 European ancestry individuals	approximately 445,000 European ancestry individuals	GCST007069	Leveraging Polygenic Functional Enrichment to Improve GWAS Power.
rs2347696	High light scatter reticulocyte percentage of red cells	7	134703331	8e-84	0.0453202	BPGM - TUBB3P2	32888494	Vuckovic D	Cell	408,112 British individuals	408,112 British individuals	GCST90002386	The Polygenic and Monogenic Basis of Blood Traits and Diseases.
rs60109929	Hippocampal volume	12	116399542	9e-08	0.49	MED13L - MIR4472-2	29274321	Chung J	Alzheimers Dement	305 European ancestry cognitively normal individuals, 581 European ancestry mild cognitive impairment cases, 190 European ancestry Alzheimer's disease dementia cases	305 European ancestry cognitively normal individuals, 581 European ancestry mild cognitive impairment cases, 190 European ancestry Alzheimer's disease dementia cases	GCST007009	Genome-wide association study of Alzheimer's disease endophenotypes at prediagnosis stages.
rs4804181	Age-related cognitive decline (language) (slope of z-scores)	19	12398722	4e-06	0.23	ZNF799	30954325	Kamboh MI	Neurobiol Aging	1,145 European ancestry individuals	1,145 European ancestry individuals	GCST009439	Population-based genome-wide association study of cognitive decline in older adults free of dementia: identification of a novel locus for the attention domain.
rs13167280	Non-small cell lung cancer	5	1280362	5e-32	1.24	TERT	31326317	Dai J	Lancet Respir Med	13,327 Chinese ancestry cases, 13,793 European ancestry cases, 13,328 Chinese ancestry controls, 14,027 European ancestry controls	13,327 Chinese ancestry cases, 13,793 European ancestry cases, 13,328 Chinese ancestry controls, 14,027 European ancestry controls	GCST008834	Identification of risk loci and a polygenic risk score for lung cancer: a large-scale prospective cohort study in Chinese populations.
rs871134	Mosaic loss of chromosome Y (Y chromosome dosage)	4	7042653	1e-14	0.032	TADA2B, CFAP184	31624269	Terao C	Nat Commun	95,380 Japanese men	95,380 Japanese men	GCST009066	GWAS of mosaic loss of chromosome Y highlights genetic effects on blood cell differentiation.
rs9390460	Factor VIII levels	6	147373198	2e-15	0.019	STXBP5	30586737	Sabater-Lleal M	Circulation	25,897 European ancestry individuals, 4,500 African American individuals, 773 Asian ancestry individuals, 1,440 Hispanic individuals	25,897 European ancestry individuals, 4,500 African American individuals, 773 Asian ancestry individuals, 1,440 Hispanic individuals	GCST007445	Genome-Wide Association Trans-Ethnic Meta-Analyses Identifies Novel Associations Regulating Coagulation Factor VIII and von Willebrand Factor Plasma Levels.
rs11785932	Male-pattern baldness	8	129686186	5e-12	0.0232384	CCDC26	30573740	Yap CX	Nat Commun	205,327 European ancestry males	205,327 European ancestry males	GCST007020	Dissection of genetic variation and evidence for pleiotropy in male pattern baldness.
rs11506039	Bitter taste perception (phenylthiocarbamide) in obesity with metabolic syndrome	7	50304948	8e-06	1.508	IKZF1	31005965	Coltell O	Am J Clin Nutr	372 individuals	372 individuals	GCST008019	Association between taste perception and adiposity in overweight or obese older subjects with metabolic syndrome and identification of novel taste-related genes.
rs6031431	Systolic blood pressure	20	44166512	6e-17	0.2792	JPH2	30578418	Giri A	Nat Genet	365,998 European ancestry individuals, 63,490 African ancestry individuals, 22,802 Hispanic individuals, 4,792 Asian ancestry individuals, 2,695 Native American ancestry individuals	365,998 European ancestry individuals, 63,490 African ancestry individuals, 22,802 Hispanic individuals, 4,792 Asian ancestry individuals, 2,695 Native American ancestry individuals	GCST007267	Trans-ethnic association study of blood pressure determinants in over 750,000 individuals.
rs13207171	Blood protein levels	6	41198081	2e-233	1.08638	TREML2	30072576	Emilsson V	Science	3,200 European ancestry individuals	3,200 European ancestry individuals	GCST006585	Co-regulatory networks of human serum proteins link genetics to disease.
rs7687559	Male-pattern baldness	4	153464773	4e-14	0.0240199	MND1 - TMEM131L	30573740	Yap CX	Nat Commun	205,327 European ancestry males	205,327 European ancestry males	GCST007020	Dissection of genetic variation and evidence for pleiotropy in male pattern baldness.
rs9247	Hay fever and/or eczema	2	233204655	3e-09	1.04613	INPP5D	31361310	Johansson A	Hum Mol Genet	84,034 European ancestry cases, 239,773 European ancestry controls	84,034 European ancestry cases, 239,773 European ancestry controls	GCST009717	Genome-wide association analysis of 350 000 Caucasians from the UK Biobank identifies novel loci for asthma, hay fever and eczema.
rs10164853	Hemoglobin concentration	2	157625480	7e-10	NA	ACVR1C	32888493	Chen MH	Cell	746,431 African American or Afro-Caribbean, African ancestry, European ancestry, East Asian ancestry, Hispanic or Latin American and South Asian ancestry individuals	746,431 African American or Afro-Caribbean, African ancestry, European ancestry, East Asian ancestry, Hispanic or Latin American and South Asian ancestry individuals	GCST90002314	Trans-ethnic and Ancestry-Specific Blood-Cell Genetics in 746,667 Individuals from 5 Global Populations.
rs2737240	Insomnia	8	115645008	3e-08	1.037	TRPS1	30804565	Jansen PR	Nat Genet	651,923 European ancestry males, 679,087 European ancestry females	651,923 European ancestry males, 679,087 European ancestry females	GCST007988	Genome-wide analysis of insomnia in 1,331,010 individuals identifies new risk loci and functional pathways.
rs141936164	Mean corpuscular hemoglobin	4	102480566	9e-10	NA	SLC39A8 - NFKB1	30595370	Kichaev G	Am J Hum Genet	approximately 443,000 European ancestry individuals	approximately 443,000 European ancestry individuals	GCST007068	Leveraging Polygenic Functional Enrichment to Improve GWAS Power.
rs706819	Mean platelet volume	12	51922139	1e-12	NA	ACVRL1	32888493	Chen MH	Cell	484,042 African American or Afro-Caribbean, African ancestry, European ancestry, East Asian ancestry, Hispanic or Latin American and South Asian ancestry individuals	484,042 African American or Afro-Caribbean, African ancestry, European ancestry, East Asian ancestry, Hispanic or Latin American and South Asian ancestry individuals	GCST90002349	Trans-ethnic and Ancestry-Specific Blood-Cell Genetics in 746,667 Individuals from 5 Global Populations.
rs34805185	Red blood cell count	19	35279881	3e-13	NA	USF2 - HAMP	30595370	Kichaev G	Am J Hum Genet	approximately 445,000 European ancestry individuals	approximately 445,000 European ancestry individuals	GCST007069	Leveraging Polygenic Functional Enrichment to Improve GWAS Power.
rs12730156	Red cell distribution width	1	112587437	4e-08	NA	ST7L	30595370	Kichaev G	Am J Hum Genet	approximately 445,000 European ancestry individuals	approximately 445,000 European ancestry individuals	GCST007074	Leveraging Polygenic Functional Enrichment to Improve GWAS Power.
rs6736362	Red cell distribution width	2	218250385	2e-41	NA	ARPC2	30595370	Kichaev G	Am J Hum Genet	approximately 445,000 European ancestry individuals	approximately 445,000 European ancestry individuals	GCST007074	Leveraging Polygenic Functional Enrichment to Improve GWAS Power.
rs11121529	Mean platelet volume	1	10211630	1e-167	0.08247	KIF1B	32888493	Chen MH	Cell	460,935 European ancestry individuals	460,935 European ancestry individuals	GCST90002346	Trans-ethnic and Ancestry-Specific Blood-Cell Genetics in 746,667 Individuals from 5 Global Populations.
rs2075803	Protein quantitative trait loci	19	51125272	5e-208	NA	SIGLEC9	32492067	Ruffieux H	PLoS Comput Biol	394 European ancestry individuals	394 European ancestry individuals	GCST010900	A fully joint Bayesian quantitative trait locus mapping of human protein abundance in plasma.
rs210148	Platelet count	6	33582248	0	0.079265	BAK1 - GGNBP1	32888493	Chen MH	Cell	542,827 European ancestry individuals	542,827 European ancestry individuals	GCST90002357	Trans-ethnic and Ancestry-Specific Blood-Cell Genetics in 746,667 Individuals from 5 Global Populations.
rs7750288	Serum metabolite levels	6	159979115	1e-17	0.215	IGF2R	33031748	Feofanova EV	Am J Hum Genet	3,926 Hispanic/Latino individuals	3,926 Hispanic/Latino individuals	GCST012021	A Genome-wide Association Study Discovers 46 Loci of the Human Metabolome in the Hispanic Community Health Study/Study of Latinos.
rs808187	Platelet count	9	35035001	9e-17	NA	SYF2P2 - SPATA31G1	32888493	Chen MH	Cell	721,201 African American or Afro-Caribbean, African ancestry, European ancestry, East Asian ancestry, Hispanic or Latin American and South Asian ancestry individuals	721,201 African American or Afro-Caribbean, African ancestry, European ancestry, East Asian ancestry, Hispanic or Latin American and South Asian ancestry individuals	GCST90002361	Trans-ethnic and Ancestry-Specific Blood-Cell Genetics in 746,667 Individuals from 5 Global Populations.
rs1008455	Platelet count	1	47208130	3e-10	NA	PDZK1IP1 - TAL1	32888493	Chen MH	Cell	721,201 African American or Afro-Caribbean, African ancestry, European ancestry, East Asian ancestry, Hispanic or Latin American and South Asian ancestry individuals	721,201 African American or Afro-Caribbean, African ancestry, European ancestry, East Asian ancestry, Hispanic or Latin American and South Asian ancestry individuals	GCST90002361	Trans-ethnic and Ancestry-Specific Blood-Cell Genetics in 746,667 Individuals from 5 Global Populations.
rs7836786	Lung function (FEV1/FVC)	8	119994587	5e-11	NA	DEPTOR	30595370	Kichaev G	Am J Hum Genet	approximately 370,000 European ancestry individuals	approximately 370,000 European ancestry individuals	GCST007080	Leveraging Polygenic Functional Enrichment to Improve GWAS Power.
rs111456533	Crohn's disease	10	124750812	3e-06	NA	EEF1AKMT2	28067908	de Lange KM	Nat Genet	12,194 European and unknown ancestry cases, 28,072 European and unknown ancestry controls	12,194 European and unknown ancestry cases, 28,072 European and unknown ancestry controls	GCST004132	Genome-wide association study implicates immune activation of multiple integrin genes in inflammatory bowel disease.
rs12134245	Breast cancer	1	91555907	4e-06	0.0288	WDR82P2 - HSP90B3P	29059683	Michailidou K	Nature	76,192 European ancestry cases, 63,082 European ancestry controls	76,192 European ancestry cases, 63,082 European ancestry controls	GCST004988	Association analysis identifies 65 new breast cancer risk loci.
rs4954585	Colorectal cancer	2	136240824	1e-06	1.258	HNRNPKP2 - UBBP1	29228715	Hofer P	Oncotarget	978 Austrian ancestry colorectal cancer cases, 636 Austrian ancestry advanced colorectal adenoma cases, 4,294 European ancestry controls	978 Austrian ancestry colorectal cancer cases, 636 Austrian ancestry advanced colorectal adenoma cases, 4,294 European ancestry controls	GCST005150	Bayesian and frequentist analysis of an Austrian genome-wide association study of colorectal cancer and advanced adenomas.
rs6938	Breast cancer	15	74843920	9e-08	0.0364	SCAMP2	29059683	Michailidou K	Nature	76,192 European ancestry cases, 63,082 European ancestry controls	76,192 European ancestry cases, 63,082 European ancestry controls	GCST004988	Association analysis identifies 65 new breast cancer risk loci.
rs2834757	Lobe attachment (rater-scored or self-reported)	21	35094773	8e-06	NA	RUNX1	29198719	Shaffer JR	Am J Hum Genet	66,741 European ancestry individuals, 5,062 Hispanic individuals, 2,857 Han Chinese ancestry individuals	66,741 European ancestry individuals, 5,062 Hispanic individuals, 2,857 Han Chinese ancestry individuals	GCST005192	Multiethnic GWAS Reveals Polygenic Architecture of Earlobe Attachment.
rs36209093	Urinary metabolite levels in chronic kidney disease	1	109687165	8e-16	0.103	GSTM2	31959995	Schlosser P	Nat Genet	1,221 cases	1,221 cases	GCST009733	Genetic studies of urinary metabolites illuminate mechanisms of detoxification and excretion in humans.
rs73069021	Urinary metabolite levels in chronic kidney disease	12	21247021	9e-19	0.722	SLCO1B1 - SLCO1A2	31959995	Schlosser P	Nat Genet	1,221 cases	1,221 cases	GCST009733	Genetic studies of urinary metabolites illuminate mechanisms of detoxification and excretion in humans.
rs10760260	Pulse pressure	9	122951247	2e-06	0.228	RABGAP1	27618447	Surendran P	Nat Genet	up to 165,276 European ancestry individuals, up to 27,487 South Asian ancestry individuals	up to 165,276 European ancestry individuals, up to 27,487 South Asian ancestry individuals	GCST006022	Trans-ancestry meta-analyses identify rare and common variants associated with blood pressure and hypertension.
rs4848367	Non-albumin protein levels	2	111017061	3e-15	0.03818	ACOXL, MIR4435-2HG	29403010	Kanai M	Nat Genet	98,538 Japanese ancestry individuals	98,538 Japanese ancestry individuals	GCST005990	Genetic analysis of quantitative traits in the Japanese population links cell types to complex human diseases.
rs6888037	Appendicular lean mass	5	128070567	3e-10	0.071889	SLC12A2-DT	31761296	Hernandez Cordero AI	Am J Hum Genet	85,750 European ancestry middle-aged adult individuals	85,750 European ancestry middle-aged adult individuals	GCST009576	Genome-wide Associations Reveal Human-Mouse Genetic Convergence and Modifiers of Myogenesis, CPNE1 and STC2.
rs876435	Aspartate aminotransferase levels	8	23016020	3e-12	6.99	RHOBTB2	33547301	Chen VL	Nat Commun	389,565 European ancestry individuals	389,565 European ancestry individuals	GCST90011899	Genome-wide association study of serum liver enzymes implicates diverse metabolic and liver pathology.
rs1038822	Prostate cancer	2	43511034	9e-10	1.1003	THADA	32887889	Rashkin SR	Nat Commun	10,792 European ancestry cases, 410,350 European ancestry controls	10,792 European ancestry cases, 410,350 European ancestry controls	GCST90011808	Pan-cancer study detects genetic risk variants and shared genetic basis in two large cohorts.
rs10007915	Prostate cancer	4	105144151	2e-17	1.1371	RNU6-351P - TET2	32887889	Rashkin SR	Nat Commun	10,792 European ancestry cases, 410,350 European ancestry controls	10,792 European ancestry cases, 410,350 European ancestry controls	GCST90011808	Pan-cancer study detects genetic risk variants and shared genetic basis in two large cohorts.
rs11600151	Platelet endothelial cell adhesion molecule levels	11	126430642	1e-26	0.1473	KIRREL3, ST3GAL4	33067605	Folkersen L	Nat Metab	21,758 European ancestry individuals	21,758 European ancestry individuals	GCST90012081	Genomic and drug target evaluation of 90 cardiovascular proteins in 30,931 individuals.
rs12451746	GZMB/IL15 protein level ratio	17	35479844	4e-146	0.175764	SLFN12L	38412862	Suhre K	Cell Genom	43,509 European ancestry individuals	43,509 European ancestry individuals	GCST90315015	Genetic associations with ratios between protein levels detect new pQTLs and reveal protein-protein interactions.
rs10800457	Serum levels of protein CDH7	1	169574025	2e-18	0.161254	F5	35078996	Gudjonsson A	Nat Commun	5,355 Icelandic ancestry individuals	5,355 Icelandic ancestry individuals	GCST90089951	A genome-wide association study of serum proteins reveals shared loci with common diseases.
rs10094039	Mitochondrial DNA levels	8	129577430	4e-11	0.0174845	CCDC26	33385171	Hagg S	Hum Genet	295,150 European ancestry individuals	295,150 European ancestry individuals	GCST012072	Deciphering the genetic and epidemiological landscape of mitochondrial DNA abundance.
rs1430055	Highest math class taken (MTAG)	2	16499521	2e-11	0.0121	GACAT3 - CYRIA	30038396	Lee JJ	Nat Genet	811,539 European ancestry individuals	811,539 European ancestry individuals	GCST006568	Gene discovery and polygenic prediction from a genome-wide association study of educational attainment in 1.1 million individuals.
rs744056	Inguinal hernia	6	6733307	3e-08	1.07	LY86 - BTF3P7	34382107	Wei J	Hernia	13,047 European ancestry cases, 262,499 European ancestry controls	13,047 European ancestry cases, 262,499 European ancestry controls	GCST90027168	Identification of fifty-seven novel loci for abdominal wall hernia development and their biological and clinical implications: results from the UK Biobank.
rs7512751	Osteocalcin (analyte X11067.13) levels	1	156264648	4e-49	0.3265	SMG5	39528825	Western D	Nat Genet	3,506 European ancestry individuals	3,506 European ancestry individuals	GCST90421294	Proteogenomic analysis of human cerebrospinal fluid identifies neurologically relevant regulation and implicates causal proteins for Alzheimer's disease.
rs12309572	Appendicular lean mass	12	53680902	5e-13	0.0183	ATP5MC2 - CALCOCO1	33097823	Pei YF	Commun Biol	450,243 European ancestry individuals	450,243 European ancestry individuals	GCST90000025	The genetic architecture of appendicular lean mass characterized by association analysis in the UK Biobank study.
rs72966841	Serum levels of protein CTSC	11	88336942	2e-196	0.941759	CTSC	35078996	Gudjonsson A	Nat Commun	5,363 Icelandic ancestry individuals	5,363 Icelandic ancestry individuals	GCST90087643	A genome-wide association study of serum proteins reveals shared loci with common diseases.
rs147341073	Clear cell renal cell carcinoma	7	92752382	6e-09	1.27	CDK6	38671320	Purdue MP	Nat Genet	752,817 European ancestry individuals, 3,526 African American or Afro-Caribbean individuals, 3,457 Hispanic or Latin American individuals	752,817 European ancestry individuals, 3,526 African American or Afro-Caribbean individuals, 3,457 Hispanic or Latin American individuals	GCST90320055	Multi-ancestry genome-wide association study of kidney cancer identifies 63 susceptibility regions.
rs10498060	Insulin-like growth factor 1 levels	2	218566568	2e-10	0.0174	USP37	33462484	Sinnott-Armstrong N	Nat Genet	340,567 European ancestry individuals, 5,974 African ancestry individuals, 7,283 South Asian ancestry individuals	340,567 European ancestry individuals, 5,974 African ancestry individuals, 7,283 South Asian ancestry individuals	GCST90019511	Genetics of 35 blood and urine biomarkers in the UK Biobank.
rs3859570	Alzheimer's disease or gastroesophageal reflux disease	19	18400115	2e-07	NA	LRRC25 - SSBP4	35851147	Adewuyi EO	Commun Biol	71,880 European ancestry Alzheimer's disease or AD-by-proxy cases, 71,522 European ancestry GERD cases, up to 644,457 European ancestry controls	71,880 European ancestry Alzheimer's disease or AD-by-proxy cases, 71,522 European ancestry GERD cases, up to 644,457 European ancestry controls	GCST90134603	A large-scale genome-wide cross-trait analysis reveals shared genetic architecture between Alzheimer's disease and gastrointestinal tract disorders.
rs1982468	Aspartate aminotransferase to alanine aminotransferase ratio	19	4953339	4e-09	0.0148	UHRF1	33462484	Sinnott-Armstrong N	Nat Genet	341,165 European ancestry individuals, 5,981 African ancestry individuals, 7,309 South Asian ancestry individuals	341,165 European ancestry individuals, 5,981 African ancestry individuals, 7,309 South Asian ancestry individuals	GCST90019498	Genetics of 35 blood and urine biomarkers in the UK Biobank.
rs12334935	Eczema	8	125605746	2e-13	1.09	TRIB1AL - LINC02964	34785669	Grosche S	Nat Commun	20,016 European ancestry cases, 380,433 European ancestry controls	20,016 European ancestry cases, 380,433 European ancestry controls	GCST90044763	Rare variant analysis in eczema identifies exonic variants in DUSP1, NOTCH4 and SLC9A4.
rs9992013	Systolic blood pressure	4	2257736	3e-08	NA	MXD4	30595370	Kichaev G	Am J Hum Genet	approximately 422,000 European ancestry individuals	approximately 422,000 European ancestry individuals	GCST007087	Leveraging Polygenic Functional Enrichment to Improve GWAS Power.
rs12332674	Lung function (FVC)	5	132987160	7e-09	NA	AFF4-DT	30595370	Kichaev G	Am J Hum Genet	approximately 372,000 European ancestry individuals	approximately 372,000 European ancestry individuals	GCST007081	Leveraging Polygenic Functional Enrichment to Improve GWAS Power.
rs458699	Plateletcrit	1	112115208	4e-15	0.0205858	LINC02884	32888494	Vuckovic D	Cell	408,112 British individuals	408,112 British individuals	GCST90002400	The Polygenic and Monogenic Basis of Blood Traits and Diseases.
rs17138703	Plateletcrit	7	18161600	4e-41	0.036974	HDAC9	32888494	Vuckovic D	Cell	408,112 British individuals	408,112 British individuals	GCST90002400	The Polygenic and Monogenic Basis of Blood Traits and Diseases.
rs62489376	Red blood cell count	7	129944094	6e-14	NA	UBE2H	32888493	Chen MH	Cell	727,624 African American or Afro-Caribbean, African ancestry, European ancestry, East Asian ancestry, Hispanic or Latin American and South Asian ancestry individuals	727,624 African American or Afro-Caribbean, African ancestry, European ancestry, East Asian ancestry, Hispanic or Latin American and South Asian ancestry individuals	GCST90002367	Trans-ethnic and Ancestry-Specific Blood-Cell Genetics in 746,667 Individuals from 5 Global Populations.
rs10160382	Systolic blood pressure	11	76416170	3e-12	NA	GVQW3 - EMSY-DT	30595370	Kichaev G	Am J Hum Genet	approximately 422,000 European ancestry individuals	approximately 422,000 European ancestry individuals	GCST007087	Leveraging Polygenic Functional Enrichment to Improve GWAS Power.
rs8177641	Interleukin-15 receptor subunit alpha levels (IL15RA.14054.17.3)	10	5974929	2e-91	0.51	IL15RA	29875488	Sun BB	Nature	3,301 European ancestry individuals	3,301 European ancestry individuals	GCST90241594	Genomic atlas of the human plasma proteome.
rs7805504	Metabolic syndrome	7	73628255	7e-09	0.10004	MLXIPL - VPS37D	38201907	Ho CY	Nutrients	24,171 Taiwanese ancestry cases, 83,059 Taiwanese ancestry controls	24,171 Taiwanese ancestry cases, 83,059 Taiwanese ancestry controls	GCST90454454	A Genome-Wide Association Study of Metabolic Syndrome in the Taiwanese Population.
rs17201560	Femur bone mineral density x serum urate levels interaction	6	32079491	3e-10	1.80132	TNXB	34046847	Yao Y	Endocrine	2,225 men, 2,350 women	2,225 men, 2,350 women	GCST012490	Evaluate the effects of serum urate level on bone mineral density: a genome-wide gene-environment interaction analysis in UK Biobank cohort.
rs71503180	Serum alkaline phosphatase levels	9	133231587	9e-84	0.0839	LCN1P1 - ABO	33462484	Sinnott-Armstrong N	Nat Genet	342,535 European ancestry individuals, 6,019 African ancestry individuals, 7,337 South Asian ancestry individuals	342,535 European ancestry individuals, 6,019 African ancestry individuals, 7,337 South Asian ancestry individuals	GCST90019494	Genetics of 35 blood and urine biomarkers in the UK Biobank.
rs10274928	Systolic blood pressure	7	28102469	9e-11	0.1592	JAZF1	30224653	Evangelou E	Nat Genet	757,601 European ancestry individuals	757,601 European ancestry individuals	GCST006624	Genetic analysis of over 1 million people identifies 535 new loci associated with blood pressure traits.
rs4983387	High density lipoprotein cholesterol levels	14	104801891	3e-09	0.0452938	ZBTB42	34887591	Graham SE	Nature	40,963 South Asian ancestry individuals	40,963 South Asian ancestry individuals	GCST90239654	The power of genetic diversity in genome-wide association studies of lipids.
rs4710973	Total cholesterol levels	6	21385471	5e-09	NA	CDKAL1 - LINC00581	34887591	Graham SE	Nature	40,963 South Asian ancestry individuals, 48,057 Hispanic individuals, 99,432 Admixed African or African ancestry individuals, 146,492 East Asian ancestry individuals, 1,320,016 European ancestry individuals	40,963 South Asian ancestry individuals, 48,057 Hispanic individuals, 99,432 Admixed African or African ancestry individuals, 146,492 East Asian ancestry individuals, 1,320,016 European ancestry individuals	GCST90239673	The power of genetic diversity in genome-wide association studies of lipids.
rs506166	Total cholesterol levels	1	52861658	9e-09	0.0620471	ZYG11A	34887591	Graham SE	Nature	99,432 Admixed African or African ancestry individuals	99,432 Admixed African or African ancestry individuals	GCST90239674	The power of genetic diversity in genome-wide association studies of lipids.
rs3776081	Platelet-derived growth factor receptor beta levels	5	150152544	3e-113	0.9608	PDGFRB	28240269	Suhre K	Nat Commun	997 European ancestry individuals	997 European ancestry individuals	GCST90101433	Connecting genetic risk to disease end points through the human blood plasma proteome.
rs10737683	Mean arterial pressure	1	196925699	1e-09	0.0134	CFHR4 - CFHR2	34594039	Sakaue S	Nat Genet	360,863 European ancestry individuals, 145,502 East Asian ancestry individuals	360,863 European ancestry individuals, 145,502 East Asian ancestry individuals	GCST90018963	A cross-population atlas of genetic associations for 220 human phenotypes.
rs8083730	Triglyceride levels	18	293519	2e-09	0.0185654	THOC1-DT - COLEC12	34887591	Graham SE	Nature	1,320,016 European ancestry individuals	1,320,016 European ancestry individuals	GCST90239664	The power of genetic diversity in genome-wide association studies of lipids.
rs470118	5-methyluridine (ribothymidine) levels	22	50539309	1e-198	0.66	CIMAP1B - KLHDC7B-DT	35347128	Yin X	Nat Commun	6,136 Finnish ancestry individuals	6,136 Finnish ancestry individuals	GCST90140243	Genome-wide association studies of metabolites in Finnish men identify disease-relevant loci.
rs2105029	Attention deficit hyperactivity disorder or autism spectrum disorder or intelligence (pleiotropy)	1	43468018	1e-12	NA	HYI-AS1 - PTPRF	35764056	Rao S	Neuropsychobiology	20,183 European ancestry ADHD cases, 18,381 European ancestry ASD cases, up to 63,160 European ancestry controls, 269,867 European ancestry individuals with intelligence measurements	20,183 European ancestry ADHD cases, 18,381 European ancestry ASD cases, up to 63,160 European ancestry controls, 269,867 European ancestry individuals with intelligence measurements	GCST90134330	Genetic Relationships between Attention-Deficit/Hyperactivity Disorder, Autism Spectrum Disorder, and Intelligence.
rs2485362	Rheumatoid arthritis (rheumatoid factor and/or anti-cyclic citrullinated peptide seropositive)	6	159082054	6e-15	1.11751	TAGAP-AS1, TAGAP	36333501	Ishigaki K	Nat Genet	17,221 European ancestry cases, 74,823 European ancestry controls, 8,340 East Asian ancestry cases, 162,608 East Asian ancestry controls, 841 African ancestry cases, 1,108 African ancestry controls, 689 South Asian ancestry cases, 1,258 South Asian ancestry controls, 357 Arab ancestry cases, 352 Arab ancestry controls	17,221 European ancestry cases, 74,823 European ancestry controls, 8,340 East Asian ancestry cases, 162,608 East Asian ancestry controls, 841 African ancestry cases, 1,108 African ancestry controls, 689 South Asian ancestry cases, 1,258 South Asian ancestry controls, 357 Arab ancestry cases, 352 Arab ancestry controls	GCST90132225	Multi-ancestry genome-wide association analyses identify novel genetic mechanisms in rheumatoid arthritis.
rs1105820	Smoking initiation	17	79799519	8e-17	0.00725	CBX8	36477530	Saunders GRB	Nature	2,669,029 European ancestry individuals	2,669,029 European ancestry individuals	GCST90243968	Genetic diversity fuels gene discovery for tobacco and alcohol use.
rs2071465	Type 2 diabetes	6	32837693	2e-10	NA	TAP2	38374256	Suzuki K	Nature	50,251 African American cases, 103,909 African American controls, 88,109 East Asian ancestry cases, 339,395 East Asian ancestry controls, 242,283 European ancestry cases, 1,569,734 European ancestry controls, 29,375 Hispanic cases, 59,368 Hispanic controls, 1,602 South African ancestry cases, 976 South African ancestry controls, 16,832 South Asian ancestry cases, 33,767 South Asian ancestry contr…	50,251 African American cases, 103,909 African American controls, 88,109 East Asian ancestry cases, 339,395 East Asian ancestry controls, 242,283 European ancestry cases, 1,569,734 European ancestry controls, 29,375 Hispanic cases, 59,368 Hispanic controls, 1,602 South African ancestry cases, 976 South African ancestry controls, 16,832 South Asian ancestry cases, 33,767 South Asian ancestry contr…	GCST90492734	Genetic drivers of heterogeneity in type 2 diabetes pathophysiology.
rs2385127	Alanine levels	8	49063187	3e-11	0.0280394	PPDPFL	35213538	Richardson TG	PLoS Biol	115,078 European ancestry individuals	115,078 European ancestry individuals	GCST90092806	Characterising metabolomic signatures of lipid-modifying therapies through drug target mendelian randomisation.
rs1515114	Nonalcoholic fatty liver disease (imputed)	2	226233671	2e-09	0.00547725	NYAP2 - MIR5702	35047847	Miao Z	HGG Adv	28,396 European ancestry cases, 108,652 European ancestry controls	28,396 European ancestry cases, 108,652 European ancestry controls	GCST90094908	Identification of 90 NAFLD GWAS loci and establishment of NAFLD PRS and causal role of NAFLD in coronary artery disease.
rs1364450	Hypothyroidism	6	109068305	2e-10	0.0886	SESN1	34594039	Sakaue S	Nat Genet	30,155 European ancestry cases, 379,986 European ancestry controls, 1,114 East Asian ancestry cases, 172,656 East Asian ancestry controls	30,155 European ancestry cases, 379,986 European ancestry controls, 1,114 East Asian ancestry cases, 172,656 East Asian ancestry controls	GCST90018862	A cross-population atlas of genetic associations for 220 human phenotypes.
rs61801825	Free cholesterol to total lipids ratio in very large HDL	1	161599096	1e-30	0.0882	FCGR2C	38448586	Karjalainen MK	Nature	4,435 East Asian ancestry individuals, 11,340 South Asian ancestry individuals, 120,241 European ancestry individuals	4,435 East Asian ancestry individuals, 11,340 South Asian ancestry individuals, 120,241 European ancestry individuals	GCST90302131	Genome-wide characterization of circulating metabolic biomarkers.
rs2295615	CD48 protein levels	1	160684968	1e-17	0.8232	CD48	38565889	Kalnapenkis A	Sci Rep	488 European ancestry individuals	488 European ancestry individuals	GCST90277831	Genetic determinants of plasma protein levels in the Estonian population.
rs11656379	Diacylglycerol (18:1_18:1) levels	17	49196153	3e-08	0.280322	B4GALNT2 - GNGT2	36193934	Tabassum R	J Am Heart Assoc	2,624 European ancestry men	2,624 European ancestry men	GCST90244214	Lipidome- and Genome-Wide Study to Understand Sex Differences in Circulatory Lipids.
rs28470722	Multi-trait sex score	1	37921055	1e-08	NA	INPP5B	37277458	Vosberg DE	Sci Rep	161,906 European ancestry females	161,906 European ancestry females	GCST90270116	The genetics of a "femaleness/maleness" score in cardiometabolic traits in the UK biobank.
rs62176784	Multi-trait sex score	2	168888041	1e-12	NA	SPC25	37277458	Vosberg DE	Sci Rep	161,906 European ancestry females	161,906 European ancestry females	GCST90270116	The genetics of a "femaleness/maleness" score in cardiometabolic traits in the UK biobank.
rs7171941	Educational attainment	15	80718885	2e-10	0.00664238	ABHD17C	35361970	Okbay A	Nat Genet	3,037,499 European ancestry individuals	3,037,499 European ancestry individuals	GCST90105038	Polygenic prediction of educational attainment within and between families from genome-wide association analyses in 3 million individuals.
rs12827748	T1 FreeSurfer DKT rh rostralmiddlefrontal area	12	79694798	1e-06	0.0703702	PPP1R12A-AS2	38811844	Fu J	Nat Genet	7,058 Chinese Han ancestry individuals	7,058 Chinese Han ancestry individuals	GCST90384311	Cross-ancestry genome-wide association studies of brain imaging phenotypes.
rs7227	Estimated glomerular filtration rate (creatinine)	15	65442518	2e-09	6.031	DPP8	35710981	Liu H	Nat Genet	1,205,871 European ancestry individuals, 168,300 East Asian ancestry individuals, 63,553 African ancestry individuals, 23,509 Hispanic or Latin American individuals, 22,103 African American individuals, 21,791 Central Asian or South Asian ancestry individuals, 1,502 Middle Eastern ancestry individuals, 939 other admixed ancestry individuals, 602 Native American ancestry individuals, 150 Asian anc…	1,205,871 European ancestry individuals, 168,300 East Asian ancestry individuals, 63,553 African ancestry individuals, 23,509 Hispanic or Latin American individuals, 22,103 African American individuals, 21,791 Central Asian or South Asian ancestry individuals, 1,502 Middle Eastern ancestry individuals, 939 other admixed ancestry individuals, 602 Native American ancestry individuals, 150 Asian anc…	GCST90100220	Epigenomic and transcriptomic analyses define core cell types, genes and targetable mechanisms for kidney disease.
rs12245680	Body mass index	10	113060432	7e-12	0.0165	TCF7L2	36581621	Huang J	Nat Commun	1,122,049 European ancestry individuals	1,122,049 European ancestry individuals	GCST90255621	Genomics and phenomics of body mass index reveals a complex disease network.
rs11626768	Total cholesterol levels	14	39217713	3e-10	0.0114084	YTHDF2P1 - MIA2	34887591	Graham SE	Nature	1,320,016 European ancestry individuals	1,320,016 European ancestry individuals	GCST90239676	The power of genetic diversity in genome-wide association studies of lipids.
rs2957873	Height	11	47227743	3e-19	0.0068	DDB2	36224396	Yengo L	Nature	5,314,291 European ancestry, Hispanic or Latin American, East Asian ancestry, African ancestry, South Asian ancestry individuals	5,314,291 European ancestry, Hispanic or Latin American, East Asian ancestry, African ancestry, South Asian ancestry individuals	GCST90245848	A saturated map of common genetic variants associated with human height.
rs5498	Soluble ICAM-1	19	10285007	5e-25	13.22	ICAM1, LIMASI	18604267	Pare G	PLoS Genet	4,570 European ancestry female individuals	4,570 European ancestry female individuals	GCST000210	Novel association of ABO histo-blood group antigen with soluble ICAM-1: results of a genome-wide association study of 6,578 women.
rs1354034	Platelet count	3	56815721	9e-13	11.44	ARHGEF3	23263863	Li J	Hum Mol Genet	7,943 African American children, 6,234 European ancestry children	7,943 African American children, 6,234 European ancestry children	GCST001783	GWAS of blood cell traits identifies novel associated loci and epistatic interactions in Caucasian and African-American children.
rs13389219	Waist-hip ratio	2	164672366	3e-08	1.13	COBLL1	23563607	Berndt SI	Nat Genet	4,774 European ancestry high waist-to-hip ratio individuals, 5,481 European ancestry low waist-to-hip ratio individuals	4,774 European ancestry high waist-to-hip ratio individuals, 5,481 European ancestry low waist-to-hip ratio individuals	GCST001954	Genome-wide meta-analysis identifies 11 new loci for anthropometric traits and provides insights into genetic architecture.
rs11082304	Height	18	23141009	5e-15	1.18	CABLES1	23563607	Berndt SI	Nat Genet	8,097 European ancestry tall individuals, 8,099 European ancestry short individuals	8,097 European ancestry tall individuals, 8,099 European ancestry short individuals	GCST001956	Genome-wide meta-analysis identifies 11 new loci for anthropometric traits and provides insights into genetic architecture.
rs1991431	Height	3	141414608	4e-47	1.33	ZBTB38	23563607	Berndt SI	Nat Genet	8,097 European ancestry tall individuals, 8,099 European ancestry short individuals	8,097 European ancestry tall individuals, 8,099 European ancestry short individuals	GCST001956	Genome-wide meta-analysis identifies 11 new loci for anthropometric traits and provides insights into genetic architecture.
rs6474359	Glycated hemoglobin levels	8	41691676	1e-08	0.06	ANK1	20858683	Soranzo N	Diabetes	up to 46,368 European ancestry individuals	up to 46,368 European ancestry individuals	GCST000803	Common variants at 10 genomic loci influence hemoglobin A₁(C) levels via glycemic and nonglycemic pathways.
rs2111485	Vitiligo	2	162254026	5e-15	1.3	FAP - IFIH1	22561518	Jin Y	Nat Genet	418 European ancestry cases, 2,810 European ancestry controls	418 European ancestry cases, 2,810 European ancestry controls	GCST001509	Genome-wide association analyses identify 13 new susceptibility loci for generalized vitiligo.
rs7574865	Primary biliary cholangitis	2	191099907	1e-06	1.35	STAT4	23000144	Nakamura M	Am J Hum Genet	487 Japanese ancestry cases, 476 Japanese ancestry controls	487 Japanese ancestry cases, 476 Japanese ancestry controls	GCST001685	Genome-wide association study identifies TNFSF15 and POU2AF1 as susceptibility loci for primary biliary cirrhosis in the Japanese population.
rs6025	Venous thromboembolism	1	169549811	2e-22	3.57	F5	22672568	Heit JA	J Thromb Haemost	1,503 European and other ancestry cases, 1,459 European and other ancestry controls	1,503 European and other ancestry cases, 1,459 European and other ancestry controls	GCST001557	A genome-wide association study of venous thromboembolism identifies risk variants in chromosomes 1q24.2 and 9q.
rs17776120	IgG glycosylation	3	187014891	2e-06	0.1654	ST6GAL1	23382691	Lauc G	PLoS Genet	2,247 European ancestry individuals	2,247 European ancestry individuals	GCST001848	Loci associated with N-glycosylation of human immunoglobulin G show pleiotropy with autoimmune diseases and haematological cancers.
rs1297265	Ulcerative colitis	21	15444732	7e-13	1.11	LINC02920 - CYCSP42	21297633	Anderson CA	Nat Genet	6,687 European ancestry cases, 19,718 European ancestry controls	6,687 European ancestry cases, 19,718 European ancestry controls	GCST000964	Meta-analysis identifies 29 additional ulcerative colitis risk loci, increasing the number of confirmed associations to 47.
rs880315	Blood pressure	1	10736809	7e-07	0.74	CASZ1	21572416	Kato N	Nat Genet	19,608 East Asian ancestry individuals	19,608 East Asian ancestry individuals	GCST001072	Meta-analysis of genome-wide association studies identifies common variants associated with blood pressure variation in east Asians.
rs6569648	Height	6	130027974	1e-21	0.04	L3MBTL3	20881960	Lango Allen H	Nature	133,653 European ancestry individuals	133,653 European ancestry individuals	GCST000817	Hundreds of variants clustered in genomic loci and biological pathways affect human height.
rs11168249	Inflammatory bowel disease	12	47814585	8e-09	1.054	HDAC7	23128233	Jostins L	Nature	12,924 European ancestry cases, 21,442 European ancestry controls	12,924 European ancestry cases, 21,442 European ancestry controls	GCST001725	Host-microbe interactions have shaped the genetic architecture of inflammatory bowel disease.
rs17119	Inflammatory bowel disease	6	14719265	3e-11	1.071	RNU6-793P - RPL6P17	23128233	Jostins L	Nature	12,924 European ancestry cases, 21,442 European ancestry controls	12,924 European ancestry cases, 21,442 European ancestry controls	GCST001725	Host-microbe interactions have shaped the genetic architecture of inflammatory bowel disease.
rs1131017	Inflammatory skin disease	12	56042145	4e-08	NA	RPS26	25574825	Baurecht H	Am J Hum Genet	2,079 European ancestry atopic dermatitis cases, 4,212 European ancestry psoriasis cases, 11,899 European ancestry controls	2,079 European ancestry atopic dermatitis cases, 4,212 European ancestry psoriasis cases, 11,899 European ancestry controls	GCST002740	Genome-wide comparative analysis of atopic dermatitis and psoriasis gives insight into opposing genetic mechanisms.
rs13330176	Rheumatoid arthritis	16	85985481	9e-09	1.12	LINC02132 - LINC01082	24390342	Okada Y	Nature	up to 14,361 European ancestry cases, up to 42,923 European ancestry controls, up to 4,873 East Asian ancestry cases, up to 17,642 East Asian ancestry controls	up to 14,361 European ancestry cases, up to 42,923 European ancestry controls, up to 4,873 East Asian ancestry cases, up to 17,642 East Asian ancestry controls	GCST002318	Genetics of rheumatoid arthritis contributes to biology and drug discovery.
rs10774624	Rheumatoid arthritis	12	111395984	7e-09	1.09	LINC02356	24390342	Okada Y	Nature	up to 14,361 European ancestry cases, up to 42,923 European ancestry controls, up to 4,873 East Asian ancestry cases, up to 17,642 East Asian ancestry controls	up to 14,361 European ancestry cases, up to 42,923 European ancestry controls, up to 4,873 East Asian ancestry cases, up to 17,642 East Asian ancestry controls	GCST002318	Genetics of rheumatoid arthritis contributes to biology and drug discovery.
rs531864	Mitochondrial DNA levels	2	168847150	8e-06	NA	SPC25, NOSTRIN	25240745	Lopez S	Mitochondrion	173 European ancestry males and 213 European ancestry females from 21 families	173 European ancestry males and 213 European ancestry females from 21 families	GCST002616	A genome-wide association study in the genetic analysis of idiopathic thrombophilia project suggests sex-specific regulation of mitochondrial DNA levels.
rs1871859	Bone mineral density	6	151577371	9e-13	NA	CCDC170	24249740	Zhang L	Hum Mol Genet	5,833 European ancestry females, 2,639 European ancestry males, 784 Han Chinese ancestry females, 763 Han Chinese ancestry males, 712 African American females, 409 Hispanic females	5,833 European ancestry females, 2,639 European ancestry males, 784 Han Chinese ancestry females, 763 Han Chinese ancestry males, 712 African American females, 409 Hispanic females	GCST002276	Multistage genome-wide association meta-analyses identified two new loci for bone mineral density.
rs1893592	Rheumatoid arthritis	21	42434957	7e-12	1.11	UBASH3A	24390342	Okada Y	Nature	up to 14,361 European ancestry cases, up to 42,923 European ancestry controls, up to 4,873 East Asian ancestry cases, up to 17,642 East Asian ancestry controls	up to 14,361 European ancestry cases, up to 42,923 European ancestry controls, up to 4,873 East Asian ancestry cases, up to 17,642 East Asian ancestry controls	GCST002318	Genetics of rheumatoid arthritis contributes to biology and drug discovery.
rs13143871	Hypertension	4	155698052	1e-06	NA	GUCY1A1	25249183	Lu X	Hum Mol Genet	5,065 Han Chinese ancestry cases, 4,404 Han Chinese ancestry controls	5,065 Han Chinese ancestry cases, 4,404 Han Chinese ancestry controls	GCST002627	Genome-wide association study in Chinese identifies novel loci for blood pressure and hypertension.
rs7578047	Anger	2	68352799	4e-06	0.22	CNRIP1 - PLEK	24489884	Mick E	PLoS One	8,747 European ancestry individuals	8,747 European ancestry individuals	GCST002324	Genome-wide association study of proneness to anger.
rs4987852	Chronic lymphocytic leukemia	18	63126688	8e-11	1.41	BCL2	23770605	Berndt SI	Nat Genet	2,179 European ancestry cases, 6,221 European ancestry controls	2,179 European ancestry cases, 6,221 European ancestry controls	GCST002073	Genome-wide association study identifies multiple risk loci for chronic lymphocytic leukemia.
rs4987855	Chronic lymphocytic leukemia	18	63126316	3e-12	1.47	BCL2	23770605	Berndt SI	Nat Genet	2,179 European ancestry cases, 6,221 European ancestry controls	2,179 European ancestry cases, 6,221 European ancestry controls	GCST002073	Genome-wide association study identifies multiple risk loci for chronic lymphocytic leukemia.
rs78058190	HDL cholesterol	2	218835276	6e-12	0.141	PRKAG3 - RPL23AP31	25961943	Surakka I	Nat Genet	up to 62,166 European ancestry individuals	up to 62,166 European ancestry individuals	GCST002899	The impact of low-frequency and rare variants on lipid levels.
rs2489279	HDL cholesterol	1	182174984	4e-09	0.038	LINC01344	25961943	Surakka I	Nat Genet	up to 62,166 European ancestry individuals	up to 62,166 European ancestry individuals	GCST002899	The impact of low-frequency and rare variants on lipid levels.
rs7555082	Crohn's disease	1	198629533	1e-10	1.13175	ATP6V1G3 - PTPRC	26192919	Liu JZ	Nat Genet	5,956 European ancestry cases, 14,927 European ancestry controls	5,956 European ancestry cases, 14,927 European ancestry controls	GCST003044	Association analyses identify 38 susceptibility loci for inflammatory bowel disease and highlight shared genetic risk across populations.
rs16841904	Chronic inflammatory diseases (ankylosing spondylitis, Crohn's disease, psoriasis, primary sclerosing cholangitis, ulcerative colitis) (pleiotropy)	1	197732862	2e-09	NA	DENND1B	26974007	Ellinghaus D	Nat Genet	8,726 European ancestry ankylosing spondylitis cases, 19,085 European ancestry Crohn’s disease cases, 6,530 European ancestry psoriasis cases, 3,408 European ancestry primary sclerosing cholangitis cases, 14,513 European ancestry ulcerative colitis cases, 34,213 European ancestry controls	8,726 European ancestry ankylosing spondylitis cases, 19,085 European ancestry Crohn’s disease cases, 6,530 European ancestry psoriasis cases, 3,408 European ancestry primary sclerosing cholangitis cases, 14,513 European ancestry ulcerative colitis cases, 34,213 European ancestry controls	GCST005537	Analysis of five chronic inflammatory diseases identifies 27 new associations and highlights disease-specific patterns at shared loci.
rs61025394	Plateletcrit	6	7085584	3e-09	0.0266281	RN7SL554P - RREB1	27863252	Astle WJ	Cell	164,339 European ancestry individuals	164,339 European ancestry individuals	GCST004607	The Allelic Landscape of Human Blood Cell Trait Variation and Links to Common Complex Disease.
rs73735248	Plateletcrit	6	21808964	2e-09	0.0300676	CASC15	27863252	Astle WJ	Cell	164,339 European ancestry individuals	164,339 European ancestry individuals	GCST004607	The Allelic Landscape of Human Blood Cell Trait Variation and Links to Common Complex Disease.
rs332507	Plateletcrit	3	124716263	1e-11	0.0300929	KALRN	27863252	Astle WJ	Cell	164,339 European ancestry individuals	164,339 European ancestry individuals	GCST004607	The Allelic Landscape of Human Blood Cell Trait Variation and Links to Common Complex Disease.
rs72928038	Chronic inflammatory diseases (ankylosing spondylitis, Crohn's disease, psoriasis, primary sclerosing cholangitis, ulcerative colitis) (pleiotropy)	6	90267049	2e-10	NA	BACH2	26974007	Ellinghaus D	Nat Genet	8,726 European ancestry ankylosing spondylitis cases, 19,085 European ancestry Crohn’s disease cases, 6,530 European ancestry psoriasis cases, 3,408 European ancestry primary sclerosing cholangitis cases, 14,513 European ancestry ulcerative colitis cases, 34,213 European ancestry controls	8,726 European ancestry ankylosing spondylitis cases, 19,085 European ancestry Crohn’s disease cases, 6,530 European ancestry psoriasis cases, 3,408 European ancestry primary sclerosing cholangitis cases, 14,513 European ancestry ulcerative colitis cases, 34,213 European ancestry controls	GCST005537	Analysis of five chronic inflammatory diseases identifies 27 new associations and highlights disease-specific patterns at shared loci.
rs6475611	Plateletcrit	9	22151140	1e-36	0.0632928	CDKN2B-AS1	27863252	Astle WJ	Cell	164,339 European ancestry individuals	164,339 European ancestry individuals	GCST004607	The Allelic Landscape of Human Blood Cell Trait Variation and Links to Common Complex Disease.
rs113542380	Plateletcrit	2	43237679	6e-32	0.0824913	THADA	27863252	Astle WJ	Cell	164,339 European ancestry individuals	164,339 European ancestry individuals	GCST004607	The Allelic Landscape of Human Blood Cell Trait Variation and Links to Common Complex Disease.
rs11235688	Plateletcrit	11	73236889	6e-10	0.0230823	P2RY2	27863252	Astle WJ	Cell	164,339 European ancestry individuals	164,339 European ancestry individuals	GCST004607	The Allelic Landscape of Human Blood Cell Trait Variation and Links to Common Complex Disease.
rs2284344	Plateletcrit	12	6336163	2e-16	0.0304796	TNFRSF1A	27863252	Astle WJ	Cell	164,339 European ancestry individuals	164,339 European ancestry individuals	GCST004607	The Allelic Landscape of Human Blood Cell Trait Variation and Links to Common Complex Disease.
rs10838634	Schizophrenia	11	46908403	5e-08	1.1	LRP4	26198764	Goes FS	Am J Med Genet B Neuropsychiatr Genet	592 Ashkenazi Jewish ancestry cases, 505 Ashkenazi Jewish ancestry controls, 36,989 cases, 113,075 controls	592 Ashkenazi Jewish ancestry cases, 505 Ashkenazi Jewish ancestry controls, 36,989 cases, 113,075 controls	GCST003048	Genome-wide association study of schizophrenia in Ashkenazi Jews.
rs9906320	Plateletcrit	17	74694690	3e-09	0.0261319	RAB37, CD300LF	27863252	Astle WJ	Cell	164,339 European ancestry individuals	164,339 European ancestry individuals	GCST004607	The Allelic Landscape of Human Blood Cell Trait Variation and Links to Common Complex Disease.
rs8103992	Pulse pressure	19	19554834	1e-09	0.198	CILP2 - PBX4	27841878	Hoffmann TJ	Nat Genet	295,529 European ancestry individuals, 8,231 Latino individuals, 3,058 African American individuals, 2,029 African British individuals, 7,701 East Asian ancestry individuals, 2,735 South Asian ancestry individuals, 1,979 mixed and unknown ancestry individuals	295,529 European ancestry individuals, 8,231 Latino individuals, 3,058 African American individuals, 2,029 African British individuals, 7,701 East Asian ancestry individuals, 2,735 South Asian ancestry individuals, 1,979 mixed and unknown ancestry individuals	GCST007096	Genome-wide association analyses using electronic health records identify new loci influencing blood pressure variation.
rs66731853	Mean corpuscular volume	1	20589745	4e-09	0.0221536	CDA	27863252	Astle WJ	Cell	172,433 European ancestry individuals	172,433 European ancestry individuals	GCST004602	The Allelic Landscape of Human Blood Cell Trait Variation and Links to Common Complex Disease.
rs17534202	Mean corpuscular volume	1	203312047	3e-27	0.0383943	BTG2-DT	27863252	Astle WJ	Cell	172,433 European ancestry individuals	172,433 European ancestry individuals	GCST004602	The Allelic Landscape of Human Blood Cell Trait Variation and Links to Common Complex Disease.
rs3809114	Platelet count	12	57454856	3e-11	0.0245827	INHBE	27863252	Astle WJ	Cell	166,066 European ancestry individuals	166,066 European ancestry individuals	GCST004603	The Allelic Landscape of Human Blood Cell Trait Variation and Links to Common Complex Disease.
rs10445308	Atopic march	17	39781794	5e-08	1.22	IKZF3	26542096	Marenholz I	Nat Commun	1,151 European ancestry early-onset eczema and childhood asthma cases, 10,030 European ancestry controls	1,151 European ancestry early-onset eczema and childhood asthma cases, 10,030 European ancestry controls	GCST003180	Meta-analysis identifies seven susceptibility loci involved in the atopic march.
rs4102217	Response to paliperidone in schizophrenia (positive Marder score)	11	65496424	7e-06	1.2945	LINC02736 - MALAT1	27846195	Li Q	Pharmacogenet Genomics	1,390 European ancestry cases	1,390 European ancestry cases	GCST004040	Genome-wide association study of paliperidone efficacy.
rs66815886	Waist-hip ratio	3	64717718	2e-76	NA	ADAMTS9-AS2	30595370	Kichaev G	Am J Hum Genet	approximately 458,000 European ancestry individuals	approximately 458,000 European ancestry individuals	GCST007067	Leveraging Polygenic Functional Enrichment to Improve GWAS Power.
rs7800072	Waist-hip ratio	7	84999673	5e-12	NA	SEMA3D	30595370	Kichaev G	Am J Hum Genet	approximately 458,000 European ancestry individuals	approximately 458,000 European ancestry individuals	GCST007067	Leveraging Polygenic Functional Enrichment to Improve GWAS Power.
rs4887023	Red cell distribution width	15	78243095	1e-06	0.0531	ACSBG1	32171239	Hodonsky CJ	BMC Genomics	17,272 Hispanic or Latin American individuals	17,272 Hispanic or Latin American individuals	GCST90012233	Ancestry-specific associations identified in genome-wide combined-phenotype study of red blood cell traits emphasize benefits of diversity in genomics.
rs1742982	Low tan response	20	32463002	3e-23	0.189	NOL4L	29739929	Visconti A	Nat Commun	46,768 European ancestry low tanning cases, 74,528 European ancestry moderate and high tanning controls	46,768 European ancestry low tanning cases, 74,528 European ancestry moderate and high tanning controls	GCST005897	Genome-wide association study in 176,678 Europeans reveals genetic loci for tanning response to sun exposure.
rs440446	Alzheimer's disease (onset between ages 58 and 79)	19	44905910	9e-59	1.63934	APOE	30979435	Lo MT	Neurobiol Aging	7,316 European ancestry cases, 7,579 European ancestry controls	7,316 European ancestry cases, 7,579 European ancestry controls	GCST009496	Identification of genetic heterogeneity of Alzheimer's disease across age.
rs9648346	Allergic rhinitis	7	28120494	3e-14	1.05	JAZF1	30013184	Waage J	Nat Genet	59,762 European and unknown ancestry cases, 152,358 European and unknown ancestry controls	59,762 European and unknown ancestry cases, 152,358 European and unknown ancestry controls	GCST006409	Genome-wide association and HLA fine-mapping studies identify risk loci and genetic pathways underlying allergic rhinitis.
rs45528934	Height	14	23324096	6e-52	NA	BCL2L2-PABPN1, PABPN1	30595370	Kichaev G	Am J Hum Genet	approximately 458,000 European ancestry individuals	approximately 458,000 European ancestry individuals	GCST007841	Leveraging Polygenic Functional Enrichment to Improve GWAS Power.
rs7730004	Metabolic syndrome	5	43190931	6e-15	0.0129352	ZNF131	39349817	Park S	Nat Genet	1,384,348 European ancestry individuals	1,384,348 European ancestry individuals	GCST90444487	Multivariate genomic analysis of 5 million people elucidates the genetic architecture of shared components of the metabolic syndrome.
rs12365699	Multiple sclerosis	11	118872577	2e-19	1.1237	Y_RNA - CXCR5	31604244	International Multiple Sclerosis Genetics Consortium	Science	14,802 European and unknown ancestry cases, 26,703 European and unknown ancestry controls	14,802 European and unknown ancestry cases, 26,703 European and unknown ancestry controls	GCST009597	Multiple sclerosis genomic map implicates peripheral immune cells and microglia in susceptibility.
rs1399180	Multiple sclerosis	10	8056756	7e-11	1.10156	GATA3, GATA3-AS1	31604244	International Multiple Sclerosis Genetics Consortium	Science	14,802 European and unknown ancestry cases, 26,703 European and unknown ancestry controls	14,802 European and unknown ancestry cases, 26,703 European and unknown ancestry controls	GCST009597	Multiple sclerosis genomic map implicates peripheral immune cells and microglia in susceptibility.
rs559406	Hematocrit	18	12857003	1e-17	NA	PTPN2	32888493	Chen MH	Cell	737,823 African American or Afro-Caribbean, African ancestry, European ancestry, East Asian ancestry, Hispanic or Latin American and South Asian ancestry individuals	737,823 African American or Afro-Caribbean, African ancestry, European ancestry, East Asian ancestry, Hispanic or Latin American and South Asian ancestry individuals	GCST90002308	Trans-ethnic and Ancestry-Specific Blood-Cell Genetics in 746,667 Individuals from 5 Global Populations.
rs6602909	Hematocrit	13	113849020	1e-17	NA	GAS6	32888493	Chen MH	Cell	737,823 African American or Afro-Caribbean, African ancestry, European ancestry, East Asian ancestry, Hispanic or Latin American and South Asian ancestry individuals	737,823 African American or Afro-Caribbean, African ancestry, European ancestry, East Asian ancestry, Hispanic or Latin American and South Asian ancestry individuals	GCST90002308	Trans-ethnic and Ancestry-Specific Blood-Cell Genetics in 746,667 Individuals from 5 Global Populations.
rs10144845	Depressed affect	14	74771067	1e-10	0.01604	YLPM1	29942085	Nagel M	Nat Genet	357,957 European ancestry individuals	357,957 European ancestry individuals	GCST006475	Meta-analysis of genome-wide association studies for neuroticism in 449,484 individuals identifies novel genetic loci and pathways.
rs1480029	Waist-to-hip ratio adjusted for BMI	12	26203099	1e-15	NA	SSPN	31669095	Zhu Z	J Allergy Clin Immunol	457,690 European ancestry individuals	457,690 European ancestry individuals	GCST009858	Shared Genetic and Experimental Links between Obesity-Related Traits and Asthma Subtypes in UK Biobank.
rs7633673	Metabolic syndrome	3	152366454	2e-09	0.00703198	MBNL1	39349817	Park S	Nat Genet	1,384,348 European ancestry individuals	1,384,348 European ancestry individuals	GCST90444487	Multivariate genomic analysis of 5 million people elucidates the genetic architecture of shared components of the metabolic syndrome.
rs752208	Body mass index	2	25232520	6e-16	NA	DNMT3A	31669095	Zhu Z	J Allergy Clin Immunol	457,822 European ancestry individuals	457,822 European ancestry individuals	GCST009871	Shared Genetic and Experimental Links between Obesity-Related Traits and Asthma Subtypes in UK Biobank.
rs9395049	Nose morphology	6	44824981	1e-06	0.401	SUPT3H	29921221	Cha S	BMC Genomics	5,643 Korean ancestry individuals	5,643 Korean ancestry individuals	GCST006110	Identification of five novel genetic loci related to facial morphology by genome-wide association studies.
rs34517439	Height	1	77984833	1e-63	NA	DNAJB4, GIPC2	30595370	Kichaev G	Am J Hum Genet	approximately 458,000 European ancestry individuals	approximately 458,000 European ancestry individuals	GCST007841	Leveraging Polygenic Functional Enrichment to Improve GWAS Power.
rs10206961	Parental longevity (father's age at death)	2	85587861	2e-06	0.01235	VAMP5	31484785	Wright KM	G3 (Bethesda)	309,383 European ancestry individuals	309,383 European ancestry individuals	GCST009447	A Prospective Analysis of Genetic Variants Associated with Human Lifespan.
rs189426461	Bone mineral density mean	11	108455600	1e-300	NA	C11orf65	37500982	He D	Osteoporos Int	5,862 South Asian ancestry individuals	5,862 South Asian ancestry individuals	GCST90321120	A longitudinal genome-wide association study of bone mineral density mean and variability in the UK Biobank.
rs78459082	HDL cholesterol levels x alcohol consumption (regular vs non-regular drinkers) interaction (2df)	12	20289851	3e-11	NA	LINC02468 - PDE3A-AS1	30698716	de Vries PS	Am J Epidemiol	44,831 European ancestry regular drinkers, 3,976 African American regular drinkers, 1,288 Asian ancestry regular drinkers, 827 Hispanic regular drinkers, 11,674 European ancestry non-regular drinkers, 5,894 African American non-regular drinkers, 1,203 Asian ancestry non-regular drinkers, 1,701 Hispanic non-regular drinkers	44,831 European ancestry regular drinkers, 3,976 African American regular drinkers, 1,288 Asian ancestry regular drinkers, 827 Hispanic regular drinkers, 11,674 European ancestry non-regular drinkers, 5,894 African American non-regular drinkers, 1,203 Asian ancestry non-regular drinkers, 1,701 Hispanic non-regular drinkers	GCST008075	Multi-Ancestry Genome-Wide Association Study of Lipid Levels Incorporating Gene-Alcohol Interactions.
rs7554936	Longevity	1	151150013	6e-06	0.009709	SEMA6C - TNFAIP8L2	31484785	Wright KM	G3 (Bethesda)	up to 482,000 European ancestry individuals	up to 482,000 European ancestry individuals	GCST009448	A Prospective Analysis of Genetic Variants Associated with Human Lifespan.
rs117371109	Bone mineral density mean	13	49677209	1e-300	NA	EBPL	37500982	He D	Osteoporos Int	5,862 South Asian ancestry individuals	5,862 South Asian ancestry individuals	GCST90321120	A longitudinal genome-wide association study of bone mineral density mean and variability in the UK Biobank.
rs2812208	Fat-free mass	13	50132951	4e-12	0.58044	DLEU1	30593698	Hubel C	Am J Med Genet B Neuropsychiatr Genet	70,700 European ancestry female individuals, 85,261 European ancestry male individuals	70,700 European ancestry female individuals, 85,261 European ancestry male individuals	GCST007063	Genomics of body fat percentage may contribute to sex bias in anorexia nervosa.
rs2048240	Systolic blood pressure	2	28417460	2e-12	0.2328	FOSL2 - PLB1	30578418	Giri A	Nat Genet	365,998 European ancestry individuals, 63,490 African ancestry individuals, 22,802 Hispanic individuals, 4,792 Asian ancestry individuals, 2,695 Native American ancestry individuals	365,998 European ancestry individuals, 63,490 African ancestry individuals, 22,802 Hispanic individuals, 4,792 Asian ancestry individuals, 2,695 Native American ancestry individuals	GCST007267	Trans-ethnic association study of blood pressure determinants in over 750,000 individuals.
rs4852777	Height	2	71307031	1e-86	NA	ZNF638	30595370	Kichaev G	Am J Hum Genet	approximately 458,000 European ancestry individuals	approximately 458,000 European ancestry individuals	GCST007841	Leveraging Polygenic Functional Enrichment to Improve GWAS Power.
rs6065668	Colorectal cancer	20	43904181	4e-11	1.11483	LINC01728 - TOX2	29471430	Tanikawa C	Carcinogenesis	6,692 Japanese ancestry cases, 27,178 Japanese ancestry controls	6,692 Japanese ancestry cases, 27,178 Japanese ancestry controls	GCST005591	GWAS Identifies Two Novel Colorectal Cancer Loci at 16q24.1 and 20q13.12.
rs2282718	Itch intensity from mosquito bite	1	24914565	9e-09	0.0215625	RUNX3	28199695	Jones AV	Hum Mol Genet	84,724 European ancestry individuals	84,724 European ancestry individuals	GCST004861	GWAS of self-reported mosquito bite size, itch intensity and attractiveness to mosquitoes implicates immune-related predisposition loci.
rs1215	FEV1	17	7260031	2e-07	0.0174	CLDN7	30804560	Shrine N	Nat Genet	321,047 European ancestry individuals	321,047 European ancestry individuals	GCST007432	New genetic signals for lung function highlight pathways and chronic obstructive pulmonary disease associations across multiple ancestries.
rs2313532	Red cell distribution width	9	130759934	4e-14	NA	ABL1	30595370	Kichaev G	Am J Hum Genet	approximately 445,000 European ancestry individuals	approximately 445,000 European ancestry individuals	GCST007074	Leveraging Polygenic Functional Enrichment to Improve GWAS Power.
rs61750929	Red cell distribution width	9	88880220	6e-36	NA	MIR4289 - PCNPP2	30595370	Kichaev G	Am J Hum Genet	approximately 445,000 European ancestry individuals	approximately 445,000 European ancestry individuals	GCST007074	Leveraging Polygenic Functional Enrichment to Improve GWAS Power.
rs2497296	Platelet count	14	104178439	4e-20	0.020164	KIF26A	32888493	Chen MH	Cell	542,827 European ancestry individuals	542,827 European ancestry individuals	GCST90002357	Trans-ethnic and Ancestry-Specific Blood-Cell Genetics in 746,667 Individuals from 5 Global Populations.
rs7672519	Platelet count	4	119622957	3e-27	NA	PDE5A	32888493	Chen MH	Cell	721,201 African American or Afro-Caribbean, African ancestry, European ancestry, East Asian ancestry, Hispanic or Latin American and South Asian ancestry individuals	721,201 African American or Afro-Caribbean, African ancestry, European ancestry, East Asian ancestry, Hispanic or Latin American and South Asian ancestry individuals	GCST90002361	Trans-ethnic and Ancestry-Specific Blood-Cell Genetics in 746,667 Individuals from 5 Global Populations.
rs616582	Mean corpuscular hemoglobin	2	111184418	2e-13	0.0265234	MIR4435-2HG	27863252	Astle WJ	Cell	172,332 European ancestry individuals	172,332 European ancestry individuals	GCST004630	The Allelic Landscape of Human Blood Cell Trait Variation and Links to Common Complex Disease.
rs12044149	Psoriatic arthritis	1	67135003	3e-12	1.296	C1orf141	26626624	Stuart PE	Am J Hum Genet	1,946 European ancestry cases, 4,934 European ancestry controls	1,946 European ancestry cases, 4,934 European ancestry controls	GCST003270	Genome-wide Association Analysis of Psoriatic Arthritis and Cutaneous Psoriasis Reveals Differences in Their Genetic Architecture.
rs79893749	Juvenile idiopathic arthritis (oligoarticular or rheumatoid factor-negative polyarticular)	3	46212159	2e-07	1.28205	CCR3	23603761	Hinks A	Nat Genet	2,816 European ancestry cases, 13,056 European ancestry controls	2,816 European ancestry cases, 13,056 European ancestry controls	GCST005528	Dense genotyping of immune-related disease regions identifies 14 new susceptibility loci for juvenile idiopathic arthritis.
rs6009946	Intelligence (MTAG)	22	50656858	3e-08	0.0196786	ARSA - Y_RNA	29326435	Hill WD	Mol Psychiatry	120,934 British ancestry individuals, 127,548 individuals	120,934 British ancestry individuals, 127,548 individuals	GCST005316	A combined analysis of genetically correlated traits identifies 187 loci and a role for neurogenesis and myelination in intelligence.
rs56228609	Coronary artery disease	16	56953853	3e-08	0.039	HERPUD1 - CETP	29212778	van der Harst P	Circ Res	34,541 cases, 261,984 controls	34,541 cases, 261,984 controls	GCST005194	Identification of 64 Novel Genetic Loci Provides an Expanded View on the Genetic Architecture of Coronary Artery Disease.
rs117499775	HDL cholesterol levels	17	46001252	6e-09	0.0282696	MAPT	32203549	Richardson TG	PLoS Med	403,943 European ancestry individuals	403,943 European ancestry individuals	GCST010242	Evaluating the relationship between circulating lipoprotein lipids and apolipoproteins with risk of coronary heart disease: A multivariable Mendelian randomisation analysis.
rs9375486	Bone mineral density mean	6	127067041	2e-11	NA	RPS4XP9 - RSPO3	37500982	He D	Osteoporos Int	141,261 European ancestry individuals	141,261 European ancestry individuals	GCST90321118	A longitudinal genome-wide association study of bone mineral density mean and variability in the UK Biobank.
rs8108623	Estimated glomerular filtration rate	19	18297709	4e-08	0.39	RPL39P38 - LSM4	30604766	Morris AP	Nat Commun	134,070 European ancestry individuals, 143,658 East Asian ancestry individuals, 26,344 Hispanic or Latino ancestry individuals, 8,224 African American individuals	134,070 European ancestry individuals, 143,658 East Asian ancestry individuals, 26,344 Hispanic or Latino ancestry individuals, 8,224 African American individuals	GCST007344	Trans-ethnic kidney function association study reveals putative causal genes and effects on kidney-specific disease aetiologies.
rs2738783	Colorectal cancer or advanced adenoma	20	63677259	5e-08	1.06	RTEL1, RTEL1-TNFRSF6B	30510241	Huyghe JR	Nat Genet	55,105 European ancestry cases, 3,026 East Asian ancestry cases, 65,079 European ancestry controls, 2,268 East Asian ancestry controls	55,105 European ancestry cases, 3,026 East Asian ancestry cases, 65,079 European ancestry controls, 2,268 East Asian ancestry controls	GCST007856	Discovery of common and rare genetic risk variants for colorectal cancer.
rs10102352	HDL cholesterol levels x long total sleep time interaction (2df test)	8	9348559	2e-15	0.006988	PPP1R3B-DT	31719535	Noordam R	Nat Commun	2,933 African American long sleepers, 364 Chinese ancestry long sleepers, 112 Asian ancestry long sleepers, up to 7,870 European ancestry long sleepers, 1,038 Hispanic/Latino long sleepers, up to 11,975 African American controls, 1,449 Chinese ancestry controls, 454 Asian ancestry controls, at least 32,171 European ancestry controls, 4,091 Hispanic/Latino controls	2,933 African American long sleepers, 364 Chinese ancestry long sleepers, 112 Asian ancestry long sleepers, up to 7,870 European ancestry long sleepers, 1,038 Hispanic/Latino long sleepers, up to 11,975 African American controls, 1,449 Chinese ancestry controls, 454 Asian ancestry controls, at least 32,171 European ancestry controls, 4,091 Hispanic/Latino controls	GCST009368	Multi-ancestry sleep-by-SNP interaction analysis in 126,926 individuals reveals lipid loci stratified by sleep duration.
rs11241692	Appendicular lean mass	5	123392125	4e-09	0.055955	CEP120	31761296	Hernandez Cordero AI	Am J Hum Genet	85,750 European ancestry middle-aged adult individuals	85,750 European ancestry middle-aged adult individuals	GCST009576	Genome-wide Associations Reveal Human-Mouse Genetic Convergence and Modifiers of Myogenesis, CPNE1 and STC2.
rs4073003	Leisure sedentary behaviour (computer use)	17	19244992	1e-09	0.0201634	EPN2	32317632	van de Vegte YJ	Nat Commun	408,815 European ancestry individuals	408,815 European ancestry individuals	GCST010085	Genome-wide association studies and Mendelian randomization analyses for leisure sedentary behaviours.
rs77704739	C-reactive protein levels	5	52785075	1e-21	0.0476549	PELO-AS1	31900758	Han X	Eur J Epidemiol	418,642 British ancestry individuals	418,642 British ancestry individuals	GCST009777	Using Mendelian randomization to evaluate the causal relationship between serum C-reactive protein levels and age-related macular degeneration.
rs1893033	Platelet count	11	119218345	2e-17	6.274	CBL	33545615	Hsu LA	Atherosclerosis	17,037 Han Chinese ancestry individuals	17,037 Han Chinese ancestry individuals	GCST012032	Circulating chemerin levels are determined through circulating platelet counts in nondiabetic Taiwanese people: A bidirectional Mendelian randomization study.
rs3810818	Waist-to-hip ratio adjusted for BMI (additive genetic model)	16	4382028	1e-08	0.0157	VASN, CORO7-PAM16, CORO7	30778226	Justice AE	Nat Genet	288,492 European ancestry individuals	288,492 European ancestry individuals	GCST007487	Protein-coding variants implicate novel genes related to lipid homeostasis contributing to body-fat distribution.
rs34850939	Medication use (HMG CoA reductase inhibitors)	3	47022420	2e-08	0.0329814	SETD2	31015401	Wu Y	Nat Commun	73,475 European ancestry cases, 216,910 European ancestry controls	73,475 European ancestry cases, 216,910 European ancestry controls	GCST007931	Genome-wide association study of medication-use and associated disease in the UK Biobank.
rs10748526	Alzheimer's disease	10	80513323	4e-06	NA	TSPAN14	33654092	Shigemizu D	Transl Psychiatry	3,962 Japanese ancestry cases, 4,074 Japanese ancestry controls, 21,982 European ancestry cases, 41,944 European ancestry controls	3,962 Japanese ancestry cases, 4,074 Japanese ancestry controls, 21,982 European ancestry cases, 41,944 European ancestry controls	GCST012214	Ethnic and trans-ethnic genome-wide association studies identify new loci influencing Japanese Alzheimer's disease risk.
rs3782473	Keratoconus	12	51362485	7e-10	0.172	GALNT6	33649486	Hardcastle AJ	Commun Biol	2,116 European ancestry cases, 24,626 European ancestry controls	2,116 European ancestry cases, 24,626 European ancestry controls	GCST90013442	A multi-ethnic genome-wide association study implicates collagen matrix integrity and cell differentiation pathways in keratoconus.
rs75851973	Psoriasis or type 2 diabetes (trans-disease meta-analysis)	5	151085018	3e-35	1.28	TNIP1	33385400	Patrick MT	J Invest Dermatol	11,024 European ancestry psoriasis cases, 74,124 European ancestry diabetes cases, 840,342 European ancestry controls	11,024 European ancestry psoriasis cases, 74,124 European ancestry diabetes cases, 840,342 European ancestry controls	GCST011991	Causal relationship and shared genetic loci between psoriasis and type 2 diabetes through trans-disease meta-analysis.
rs3778754	Papillary renal cell carcinoma	7	128935498	9e-10	0.82	KCP - IRF5	38671320	Purdue MP	Nat Genet	738,319 European ancestry individuals, 3,342 African American or Afro-Caribbean individuals	738,319 European ancestry individuals, 3,342 African American or Afro-Caribbean individuals	GCST90320056	Multi-ancestry genome-wide association study of kidney cancer identifies 63 susceptibility regions.
rs61944375	Platelet count	12	111429489	4e-14	NA	SH2B3	34469753	Kachuri L	Am J Hum Genet	235,256 European ancestry individuals	235,256 European ancestry individuals	GCST90056183	Genetic determinants of blood-cell traits influence susceptibility to childhood acute lymphoblastic leukemia.
rs318493	Plateletcrit	6	2904557	8e-10	0.015888	SERPINB9 - SERPINB6	32888494	Vuckovic D	Cell	408,112 British individuals	408,112 British individuals	GCST90002400	The Polygenic and Monogenic Basis of Blood Traits and Diseases.
rs4902750	Plateletcrit	14	69719723	3e-09	0.0184465	SUSD6 - SRSF5	32888494	Vuckovic D	Cell	408,112 British individuals	408,112 British individuals	GCST90002400	The Polygenic and Monogenic Basis of Blood Traits and Diseases.
rs12680217	Type 2 diabetes	8	37540285	2e-08	0.0397	LINC01605	32541925	Vujkovic M	Nat Genet	148,726 European ancestry cases, 24,646 African American cases, 8,616 Hispanic cases, 46,511 Asian ancestry cases, 965,732 European ancestry controls, 31,446 African American controls, 11,829 Hispanic controls, 169,776 Asian ancestry controls	148,726 European ancestry cases, 24,646 African American cases, 8,616 Hispanic cases, 46,511 Asian ancestry cases, 965,732 European ancestry controls, 31,446 African American controls, 11,829 Hispanic controls, 169,776 Asian ancestry controls	GCST010557	Discovery of 318 new risk loci for type 2 diabetes and related vascular outcomes among 1.4 million participants in a multi-ancestry meta-analysis.
rs7696969	Platelet distribution width	4	142405561	4e-66	0.0399369	INPP4B	32888494	Vuckovic D	Cell	408,112 British individuals	408,112 British individuals	GCST90002401	The Polygenic and Monogenic Basis of Blood Traits and Diseases.
rs12247907	Alzheimer's disease or educational attainment (pleiotropy)	10	63557285	2e-07	36.9766	REEP3	34743297	Kulminski AM	Geroscience	(see Lambert 2013 and Okbay 2016)	(see Lambert 2013 and Okbay 2016)	GCST90095190	Pleiotropic predisposition to Alzheimer's disease and educational attainment: insights from the summary statistics analysis.
rs7529794	Phosphatidylcholine (18:1_0:0) levels	1	39937698	8e-11	0.125907	MYCL - Y_RNA	37907536	Ottensmann L	Nat Commun	7,174 Finnish ancestry individuals	7,174 Finnish ancestry individuals	GCST90277266	Genome-wide association analysis of plasma lipidome identifies 495 genetic associations.
rs10932201	Total cholesterol levels	2	207561533	1e-08	0.0092267	CREB1	34887591	Graham SE	Nature	1,320,016 European ancestry individuals	1,320,016 European ancestry individuals	GCST90239676	The power of genetic diversity in genome-wide association studies of lipids.
rs190789	Type 2 diabetes	20	43721344	8e-09	0.0589	MYBL2 - GTSF1L	39379762	Huerta-Chagoya A	Nat Genet	51,256 African, African American, East Asian, South Asian, European, Middle Eastern, admixed American, other or other admixed ancestry cases, 370,487 African, African American, East Asian, South Asian, European, Middle Eastern, admixed American, other or other admixed ancestry controls	51,256 African, African American, East Asian, South Asian, European, Middle Eastern, admixed American, other or other admixed ancestry cases, 370,487 African, African American, East Asian, South Asian, European, Middle Eastern, admixed American, other or other admixed ancestry controls	GCST90444202	Rare variant analyses in 51,256 type 2 diabetes cases and 370,487 controls reveal the pathogenicity spectrum of monogenic diabetes genes.
rs577195	Cholesterol levels in very large HDL	7	130765902	3e-10	0.0239683	KLF14 - LINC-PINT	35213538	Richardson TG	PLoS Biol	115,082 European ancestry individuals	115,082 European ancestry individuals	GCST90093004	Characterising metabolomic signatures of lipid-modifying therapies through drug target mendelian randomisation.
rs3102347	Sphingomyelin (d18:1/20:0) levels/Sphingomyelin (d16:1/22:0) levels	16	89303461	3e-08	0.165	ANKRD11	35668104	Cadby G	Nat Commun	4,492 European ancestry individuals	4,492 European ancestry individuals	GCST90024508	Comprehensive genetic analysis of the human lipidome identifies loci associated with lipid homeostasis with links to coronary artery disease.
rs12435486	Attention deficit hyperactivity disorder or autism spectrum disorder or intelligence (pleiotropy)	14	98204512	9e-10	NA	LINC02295 - RN7SL714P	35764056	Rao S	Neuropsychobiology	20,183 European ancestry ADHD cases, 18,381 European ancestry ASD cases, up to 63,160 European ancestry controls, 269,867 European ancestry individuals with intelligence measurements	20,183 European ancestry ADHD cases, 18,381 European ancestry ASD cases, up to 63,160 European ancestry controls, 269,867 European ancestry individuals with intelligence measurements	GCST90134330	Genetic Relationships between Attention-Deficit/Hyperactivity Disorder, Autism Spectrum Disorder, and Intelligence.
rs45524632	Leukocyte telomere length or COVID-19 hospitalization (MTAG)	19	10486312	1e-12	NA	KEAP1	38882679	Zhang J	Comput Struct Biotechnol J	472,174 European ancestry individuals with telomere measurements, 35,519 European ancestry COVID-19 cases, 2,062,805 European ancestry controls	472,174 European ancestry individuals with telomere measurements, 35,519 European ancestry COVID-19 cases, 2,062,805 European ancestry controls	GCST90446229	Causal association and shared genetics between telomere length and COVID-19 outcomes: New evidence from the latest large-scale summary statistics.
rs235220	Hypothyroidism	1	12203862	7e-10	1.06	TNFRSF1B	39067062	Figueredo J	Eur J Endocrinol	58,783 European ancestry cases, 633,203 European ancestry controls	58,783 European ancestry cases, 633,203 European ancestry controls	GCST90319320	Uncovering the Shared Genetic Components of Thyroid Disorders and Reproductive Health.
rs10972201	COVID-19 hospitalization or rheumatoid arthritis (MTAG)	9	34707376	3e-19	NA	CCL19 - CCL21	36762574	Yao M	J Med Virol	32,519 European ancestry COVID-19 hospitalization cases, 14,361 European ancestry RA cases, 2,106,728 European ancestry controls	32,519 European ancestry COVID-19 hospitalization cases, 14,361 European ancestry RA cases, 2,106,728 European ancestry controls	GCST90255368	Disentangling the common genetic architecture and causality of rheumatoid arthritis and systemic lupus erythematosus with COVID-19 outcomes: genome-wide cross trait analysis and bi-directional Mendelian randomization study.
rs517328	Hematocrit	1	231306476	3e-10	NA	RNA5SP80 - EXOC8	38116116	Chen CY	Cell Genom	92,615 Taiwanese ancestry individuals	92,615 Taiwanese ancestry individuals	GCST90278634	Analysis across Taiwan Biobank, Biobank Japan, and UK Biobank identifies hundreds of novel loci for 36 quantitative traits.
rs17138740	Platelet count	7	18184974	7e-24	0.022	HDAC9	34594039	Sakaue S	Nat Genet	350,474 European ancestry individuals, 148,623 East Asian ancestry individuals	350,474 European ancestry individuals, 148,623 East Asian ancestry individuals	GCST90018969	A cross-population atlas of genetic associations for 220 human phenotypes.
rs73961715	Kynureninase levels	2	143046278	2e-112	0.91	KYNU	34814699	Katz DH	Circulation	1,852 African American or Afro-Caribbean individuals	1,852 African American or Afro-Caribbean individuals	GCST90137875	Whole Genome Sequence Analysis of the Plasma Proteome in Black Adults Provides Novel Insights Into Cardiovascular Disease.
rs7000289	Fc receptor-like protein 1 levels	8	129584984	6e-13	0.104	CCDC26	34648354	Pietzner M	Science	10,708 European ancestry individuals	10,708 European ancestry individuals	GCST90247565	Mapping the proteo-genomic convergence of human diseases.
rs6698440	red cell diameter width (RDW, minimum, inv-norm transformed)	1	20932219	2e-14	0.02224	EIF4G3	39024449	Verma A	Science	110,610 African American or Afro-Caribbean individuals, 51,949 Hispanic or Latin American individuals, 5,548 East Asian ancestry individuals, 380,819 European ancestry individuals	110,610 African American or Afro-Caribbean individuals, 51,949 Hispanic or Latin American individuals, 5,548 East Asian ancestry individuals, 380,819 European ancestry individuals	GCST90480673	Diversity and scale: Genetic architecture of 2068 traits in the VA Million Veteran Program.
rs7912751	triglyceride (maximum, inv-norm transformed)	10	5215978	2e-13	0.03206	AKR1C4	39024449	Verma A	Science	107,605 African American or Afro-Caribbean individuals, 53,373 Hispanic or Latin American individuals, 5,787 East Asian ancestry individuals, 391,247 European ancestry individuals	107,605 African American or Afro-Caribbean individuals, 53,373 Hispanic or Latin American individuals, 5,787 East Asian ancestry individuals, 391,247 European ancestry individuals	GCST90480717	Diversity and scale: Genetic architecture of 2068 traits in the VA Million Veteran Program.
rs1265564	Type 1 diabetes	12	111270654	1e-16	1.45	CUX2	22293688	Huang J	Eur J Hum Genet	16,179 European ancestry individuals	16,179 European ancestry individuals	GCST001394	1000 Genomes-based imputation identifies novel and refined associations for the Wellcome Trust Case Control Consortium phase 1 Data.
rs2239633	Acute lymphoblastic leukemia (childhood)	14	23119848	3e-07	1.34	CEBPE	19684604	Papaemmanuil E	Nat Genet	907 European ancestry cases, 2,398 European ancestry controls	907 European ancestry cases, 2,398 European ancestry controls	GCST000463	Loci on 7p12.2, 10q21.2 and 14q11.2 are associated with risk of childhood acute lymphoblastic leukemia.
rs11071559	Asthma	15	60777789	1e-07	1.18	RORA	20860503	Moffatt MF	N Engl J Med	10,365 cases, 16,110 controls	10,365 cases, 16,110 controls	GCST000804	A large-scale, consortium-based genomewide association study of asthma.
rs4409785	Multiple sclerosis	11	95578258	6e-07	1.1	LNCRNA-IUR - FAM76B	21833088	Sawcer S	Nature	9,772 European ancestry cases, 16,849 European ancestry controls	9,772 European ancestry cases, 16,849 European ancestry controls	GCST001198	Genetic risk and a primary role for cell-mediated immune mechanisms in multiple sclerosis.
rs6534347	Type 1 diabetes	4	122277280	2e-06	1.3	BLTP1	17554300	Wellcome Trust Case Control Consortium	Nature	1,963 European ancestry cases, 2,938 European ancestry controls	1,963 European ancestry cases, 2,938 European ancestry controls	GCST000043	Genome-wide association study of 14,000 cases of seven common diseases and 3,000 shared controls.
rs295	Metabolic syndrome	8	19958727	2e-09	0.17	LPL	21386085	Kraja AT	Diabetes	22,161 European ancestry individuals	22,161 European ancestry individuals	GCST001003	A bivariate genome-wide approach to metabolic syndrome: STAMPEED consortium.
rs10036748	Systemic lupus erythematosus	5	151078585	2e-09	1.23	TNIP1	19838193	Han JW	Nat Genet	1,047 Han Chinese ancestry cases, 1,205 Han Chinese ancestry controls	1,047 Han Chinese ancestry cases, 1,205 Han Chinese ancestry controls	GCST000507	Genome-wide association study in a Chinese Han population identifies nine new susceptibility loci for systemic lupus erythematosus.
rs2068888	Triglycerides	10	93079885	2e-08	2.28	CYP26A1 - NIP7P1	20686565	Teslovich TM	Nature	96,598 European ancestry individuals	96,598 European ancestry individuals	GCST000758	Biological, clinical and population relevance of 95 loci for blood lipids.
rs17293632	Crohn's disease	15	67150258	3e-19	1.12	SMAD3	21102463	Franke A	Nat Genet	6,333 European ancestry cases, 15,056 European ancestry controls	6,333 European ancestry cases, 15,056 European ancestry controls	GCST000879	Genome-wide meta-analysis increases to 71 the number of confirmed Crohn's disease susceptibility loci.
rs3865444	Alzheimer's disease (late onset)	19	51224706	3e-06	1.06	SIGLEC22P - CD33	24162737	Lambert JC	Nat Genet	17,008 European ancestry cases, 37,154 European ancestry controls	17,008 European ancestry cases, 37,154 European ancestry controls	GCST002245	Meta-analysis of 74,046 individuals identifies 11 new susceptibility loci for Alzheimer's disease.
rs4676410	Sclerosing cholangitis and ulcerative colitis (combined)	2	240624322	2e-09	1.38	GPR35	22821403	Ellinghaus D	Hepatology	Up to 389 European ancestry primary sclerosing cholangitis cases, 987 European ancestry ulcerative colitis cases, 2,968 European ancestry controls	Up to 389 European ancestry primary sclerosing cholangitis cases, 987 European ancestry ulcerative colitis cases, 2,968 European ancestry controls	GCST001615	Genome-wide association analysis in primary sclerosing cholangitis and ulcerative colitis identifies risk loci at GPR35 and TCF4.
rs962993	Self-reported allergy	10	9011169	2e-08	0.0707	LINC02676 - LINC00709	23817569	Hinds DA	Nat Genet	53,862 European ancestry individuals	53,862 European ancestry individuals	GCST002083	A genome-wide association meta-analysis of self-reported allergy identifies shared and allergy-specific susceptibility loci.
rs45616239	Inflammatory skin disease	4	122335010	1e-06	NA	BLTP1	25574825	Baurecht H	Am J Hum Genet	2,079 European ancestry atopic dermatitis cases, 4,212 European ancestry psoriasis cases, 11,899 European ancestry controls	2,079 European ancestry atopic dermatitis cases, 4,212 European ancestry psoriasis cases, 11,899 European ancestry controls	GCST002740	Genome-wide comparative analysis of atopic dermatitis and psoriasis gives insight into opposing genetic mechanisms.
rs9372120	Rheumatoid arthritis	6	106219660	8e-10	1.11	ATG5	24390342	Okada Y	Nature	up to 14,361 European ancestry cases, up to 42,923 European ancestry controls, up to 4,873 East Asian ancestry cases, up to 17,642 East Asian ancestry controls	up to 14,361 European ancestry cases, up to 42,923 European ancestry controls, up to 4,873 East Asian ancestry cases, up to 17,642 East Asian ancestry controls	GCST002318	Genetics of rheumatoid arthritis contributes to biology and drug discovery.
rs3218251	Rheumatoid arthritis	22	37149465	6e-06	1.08	IL2RB	24390342	Okada Y	Nature	up to 14,361 European ancestry cases, up to 42,923 European ancestry controls, up to 4,873 East Asian ancestry cases, up to 17,642 East Asian ancestry controls	up to 14,361 European ancestry cases, up to 42,923 European ancestry controls, up to 4,873 East Asian ancestry cases, up to 17,642 East Asian ancestry controls	GCST002318	Genetics of rheumatoid arthritis contributes to biology and drug discovery.
rs35850753	Glioblastoma	17	7675353	4e-12	2.79	TP53	26424050	Kinnersley B	Nat Commun	1,783 Northern European ancestry cases, 7,435 Northern European ancestry controls	1,783 Northern European ancestry cases, 7,435 Northern European ancestry controls	GCST003220	Genome-wide association study identifies multiple susceptibility loci for glioma.
rs6999452	Gut microbiome composition (summer)	8	105384888	3e-06	0.713262	ZFPM2	26528553	Davenport ER	PLoS One	91 Hutterite individuals	91 Hutterite individuals	GCST003221	Genome-Wide Association Studies of the Human Gut Microbiota.
rs2979489	Mean corpuscular volume	8	30423317	1e-10	0.002	RBPMS	28017375	van Rooij FJA	Am J Hum Genet	up to 29,946 European ancestry individuals, up to 6150 African American individuals, 15,074 East Asian individuals.	up to 29,946 European ancestry individuals, up to 6150 African American individuals, 15,074 East Asian individuals.	GCST004004	Genome-wide Trans-ethnic Meta-analysis Identifies Seven Genetic Loci Influencing Erythrocyte Traits and a Role for RBPMS in Erythropoiesis.
rs12005199	Plateletcrit	9	4763491	4e-213	0.129103	AK3 - ECM1P1	27863252	Astle WJ	Cell	164,339 European ancestry individuals	164,339 European ancestry individuals	GCST004607	The Allelic Landscape of Human Blood Cell Trait Variation and Links to Common Complex Disease.
rs1887430	Plateletcrit	9	4856234	9e-99	0.0784447	RCL1	27863252	Astle WJ	Cell	164,339 European ancestry individuals	164,339 European ancestry individuals	GCST004607	The Allelic Landscape of Human Blood Cell Trait Variation and Links to Common Complex Disease.
rs2497318	Chronic inflammatory diseases (ankylosing spondylitis, Crohn's disease, psoriasis, primary sclerosing cholangitis, ulcerative colitis) (pleiotropy)	10	92672243	3e-11	NA	EIF2S2P3 - HHEX	26974007	Ellinghaus D	Nat Genet	8,726 European ancestry ankylosing spondylitis cases, 19,085 European ancestry Crohn’s disease cases, 6,530 European ancestry psoriasis cases, 3,408 European ancestry primary sclerosing cholangitis cases, 14,513 European ancestry ulcerative colitis cases, 34,213 European ancestry controls	8,726 European ancestry ankylosing spondylitis cases, 19,085 European ancestry Crohn’s disease cases, 6,530 European ancestry psoriasis cases, 3,408 European ancestry primary sclerosing cholangitis cases, 14,513 European ancestry ulcerative colitis cases, 34,213 European ancestry controls	GCST005537	Analysis of five chronic inflammatory diseases identifies 27 new associations and highlights disease-specific patterns at shared loci.
rs8180991	C-reactive protein levels or LDL-cholesterol levels (pleiotropy)	8	125488108	5e-11	NA	TRIB1AL	27286809	Ligthart S	BMC Genomics	65,000 individuals (C-reactive protein), 95,454 individuals (LDL-cholesterol)	65,000 individuals (C-reactive protein), 95,454 individuals (LDL-cholesterol)	GCST003679	Bivariate genome-wide association study identifies novel pleiotropic loci for lipids and inflammation.
rs75107793	Platelet count	22	50190508	2e-59	0.115732	TRABD	27863252	Astle WJ	Cell	166,066 European ancestry individuals	166,066 European ancestry individuals	GCST004603	The Allelic Landscape of Human Blood Cell Trait Variation and Links to Common Complex Disease.
rs4937333	Plateletcrit	11	128460625	6e-17	0.0313369	ETS1	27863252	Astle WJ	Cell	164,339 European ancestry individuals	164,339 European ancestry individuals	GCST004607	The Allelic Landscape of Human Blood Cell Trait Variation and Links to Common Complex Disease.
rs9979383	Celiac disease and Rheumatoid arthritis	21	35343463	1e-08	0.92	RUNX1	26546613	Gutierrez-Achury J	Hum Mol Genet	371 South Asian ancestry celiac disease cases, 3,138 European ancestry celiac disease cases, 4,418 European ancestry rheumatoid arthritis cases, 509 South Asian ancestry celiac disease controls, 2,473 European ancestry celiac disease controls, 3,300 European ancestry rheumatoid arthritis controls, 8,872 celiac disease cases, 9,401 rheumatoid arthritis cases, 4,845 celiac disease controls, 9,627 r…	371 South Asian ancestry celiac disease cases, 3,138 European ancestry celiac disease cases, 4,418 European ancestry rheumatoid arthritis cases, 509 South Asian ancestry celiac disease controls, 2,473 European ancestry celiac disease controls, 3,300 European ancestry rheumatoid arthritis controls, 8,872 celiac disease cases, 9,401 rheumatoid arthritis cases, 4,845 celiac disease controls, 9,627 r…	GCST008644	Functional implications of disease-specific variants in loci jointly associated with coeliac disease and rheumatoid arthritis.
rs72699855	Post bronchodilator FEV1/FVC ratio	14	92639608	2e-07	0.013	RIN3	26634245	Lutz SM	BMC Genet	10,094 European ancestry current and former smoker individuals, 3,260 African American current and former smoker individuals, 178 current and former smoker individuals	10,094 European ancestry current and former smoker individuals, 3,260 African American current and former smoker individuals, 178 current and former smoker individuals	GCST003264	A genome-wide association study identifies risk loci for spirometric measures among smokers of European and African ancestry.
rs17849501	Systemic lupus erythematosus	1	183573188	2e-59	2.24	NCF2, SMG7	27399966	Morris DL	Nat Genet	1,659 Chinese ancestry cases, 3,398 Chinese ancestry controls, 4,036 European ancestry cases, 6,959 European ancestry controls	1,659 Chinese ancestry cases, 3,398 Chinese ancestry controls, 4,036 European ancestry cases, 6,959 European ancestry controls	GCST003622	Genome-wide association meta-analysis in Chinese and European individuals identifies ten new loci associated with systemic lupus erythematosus.
rs8095374	Clinical laboratory measurements	18	46213522	2e-10	NA	ARK2N	27897004	Verma SS	Pac Symp Biocomput	17,347 European ancestry individuals	17,347 European ancestry individuals	GCST003540	IDENTIFYING GENETIC ASSOCIATIONS WITH VARIABILITY IN METABOLIC HEALTH AND BLOOD COUNT LABORATORY VALUES: DIVING INTO THE QUANTITATIVE TRAITS BY LEVERAGING LONGITUDINAL DATA FROM AN EHR.
rs1689510	Pediatric autoimmune diseases	12	56002984	4e-09	NA	SUOX	26301688	Li YR	Nat Med	97 European ancestry thyroiditis cases, 107 European ancestry ankylosing spondylitis cases, 100 European ancestry psoriasis cases, 173 European ancestry celiac disease cases, 254 European ancestry systemic lupus erythematosus cases, 308 European ancestry common variable inmunodeficiency cases, 865 European ancestry ulcerative colitis cases, 1,086 European ancestry Type 1 diabetes cases, 1,123 Eur…	97 European ancestry thyroiditis cases, 107 European ancestry ankylosing spondylitis cases, 100 European ancestry psoriasis cases, 173 European ancestry celiac disease cases, 254 European ancestry systemic lupus erythematosus cases, 308 European ancestry common variable inmunodeficiency cases, 865 European ancestry ulcerative colitis cases, 1,086 European ancestry Type 1 diabetes cases, 1,123 Eur…	GCST003097	Meta-analysis of shared genetic architecture across ten pediatric autoimmune diseases.
rs532436	Myocardial infarction	9	133274414	2e-17	1.12	ABO	26343387	Nikpay M	Nat Genet	27,509 European ancestry cases, 130 African American cases, 278 Hispanic American cases, 10,257 South Asian ancestry cases, 288 Lebanese ancestry cases, 1,687 East Asian ancestry cases, 99,121 European ancestry controls, 2,778 African American controls, 3,337 Hispanic American controls, 12,899 South Asian ancestry controls, 466 Lebanese ancestry controls, 7,709 East Asian ancestry controls	27,509 European ancestry cases, 130 African American cases, 278 Hispanic American cases, 10,257 South Asian ancestry cases, 288 Lebanese ancestry cases, 1,687 East Asian ancestry cases, 99,121 European ancestry controls, 2,778 African American controls, 3,337 Hispanic American controls, 12,899 South Asian ancestry controls, 466 Lebanese ancestry controls, 7,709 East Asian ancestry controls	GCST003117	A comprehensive 1,000 Genomes-based genome-wide association meta-analysis of coronary artery disease.
rs62389423	Melanoma	6	421281	9e-14	1.24	IRF4 - EXOC2	28212542	Ransohoff KJ	Oncotarget	4,842 European ancestry cases, 286,565 European ancestry controls	4,842 European ancestry cases, 286,565 European ancestry controls	GCST004142	Two-stage genome-wide association study identifies a novel susceptibility locus associated with melanoma.
rs80054178	Plateletcrit	20	31706879	4e-32	0.145199	BCL2L1-AS1, BCL2L1	27863252	Astle WJ	Cell	164,339 European ancestry individuals	164,339 European ancestry individuals	GCST004607	The Allelic Landscape of Human Blood Cell Trait Variation and Links to Common Complex Disease.
rs4240624	Schizophrenia	8	9326721	8e-06	1.08696	PPP1R3B-DT	26198764	Goes FS	Am J Med Genet B Neuropsychiatr Genet	592 Ashkenazi Jewish ancestry cases, 505 Ashkenazi Jewish ancestry controls, 36,989 cases, 113,075 controls	592 Ashkenazi Jewish ancestry cases, 505 Ashkenazi Jewish ancestry controls, 36,989 cases, 113,075 controls	GCST003048	Genome-wide association study of schizophrenia in Ashkenazi Jews.
rs2173714	General cognitive ability	16	69844631	1e-06	4.896	WWP2	29844566	Davies G	Nat Commun	up to 300,486 European ancestry individuals	up to 300,486 European ancestry individuals	GCST006269	Study of 300,486 individuals identifies 148 independent genetic loci influencing general cognitive function.
rs137955	Multiple sclerosis	22	39895803	1e-08	1.0568	ENTHD1 - GRAP2	31604244	International Multiple Sclerosis Genetics Consortium	Science	14,802 European and unknown ancestry cases, 26,703 European and unknown ancestry controls	14,802 European and unknown ancestry cases, 26,703 European and unknown ancestry controls	GCST009597	Multiple sclerosis genomic map implicates peripheral immune cells and microglia in susceptibility.
rs61841332	Asthma	10	6586262	1e-10	NA	PRKCQ-AS1	31361310	Johansson A	Hum Mol Genet	41,926 European ancestry cases, 239,773 European ancestry controls	41,926 European ancestry cases, 239,773 European ancestry controls	GCST009720	Genome-wide association analysis of 350 000 Caucasians from the UK Biobank identifies novel loci for asthma, hay fever and eczema.
rs123698	Hematocrit	19	807442	2e-53	NA	PTBP1	32888493	Chen MH	Cell	737,823 African American or Afro-Caribbean, African ancestry, European ancestry, East Asian ancestry, Hispanic or Latin American and South Asian ancestry individuals	737,823 African American or Afro-Caribbean, African ancestry, European ancestry, East Asian ancestry, Hispanic or Latin American and South Asian ancestry individuals	GCST90002308	Trans-ethnic and Ancestry-Specific Blood-Cell Genetics in 746,667 Individuals from 5 Global Populations.
rs4804311	Metabolic syndrome	19	8550705	8e-30	0.0256485	MYO1F	39349817	Park S	Nat Genet	1,384,348 European ancestry individuals	1,384,348 European ancestry individuals	GCST90444487	Multivariate genomic analysis of 5 million people elucidates the genetic architecture of shared components of the metabolic syndrome.
rs8103278	Asthma	19	45867123	3e-12	NA	FOXA3	32296059	Han Y	Nat Commun	84,492 European ancestry cases, 2,149 African American cases, 606 Hispanic cases, 1,239 Japanese ancestry cases, 437,036 European ancestry controls, 6,055 African American controls, 792 Hispanic controls, 3,976 Japanese ancestry controls	84,492 European ancestry cases, 2,149 African American cases, 606 Hispanic cases, 1,239 Japanese ancestry cases, 437,036 European ancestry controls, 6,055 African American controls, 792 Hispanic controls, 3,976 Japanese ancestry controls	GCST010043	Genome-wide analysis highlights contribution of immune system pathways to the genetic architecture of asthma.
rs7636495	Asthma	3	196641065	2e-16	NA	PIGX, NRROS	32296059	Han Y	Nat Commun	84,492 European ancestry cases, 2,149 African American cases, 606 Hispanic cases, 1,239 Japanese ancestry cases, 437,036 European ancestry controls, 6,055 African American controls, 792 Hispanic controls, 3,976 Japanese ancestry controls	84,492 European ancestry cases, 2,149 African American cases, 606 Hispanic cases, 1,239 Japanese ancestry cases, 437,036 European ancestry controls, 6,055 African American controls, 792 Hispanic controls, 3,976 Japanese ancestry controls	GCST010043	Genome-wide analysis highlights contribution of immune system pathways to the genetic architecture of asthma.
rs2390314	Atopic asthma	7	20416355	7e-09	NA	ITGB8 - EEF1A1P27	31669095	Zhu Z	J Allergy Clin Immunol	23,982 European ancestry cases, 393,169 European ancestry controls	23,982 European ancestry cases, 393,169 European ancestry controls	GCST009850	Shared Genetic and Experimental Links between Obesity-Related Traits and Asthma Subtypes in UK Biobank.
rs61033544	Atopic asthma	2	111520962	4e-08	NA	SOCAR, MIR4435-2HG	31669095	Zhu Z	J Allergy Clin Immunol	23,982 European ancestry cases, 393,169 European ancestry controls	23,982 European ancestry cases, 393,169 European ancestry controls	GCST009850	Shared Genetic and Experimental Links between Obesity-Related Traits and Asthma Subtypes in UK Biobank.
rs34135146	Worry	3	52279416	1e-09	0.02174	WDR82	29942085	Nagel M	Nat Genet	348,219 European ancestry individuals	348,219 European ancestry individuals	GCST006478	Meta-analysis of genome-wide association studies for neuroticism in 449,484 individuals identifies novel genetic loci and pathways.
rs35668054	Asthma	2	71827707	4e-08	1.06589	DYSF - RPS20P10	32296059	Han Y	Nat Commun	64,538 European ancestry cases, 239,321 European ancestry controls	64,538 European ancestry cases, 239,321 European ancestry controls	GCST010042	Genome-wide analysis highlights contribution of immune system pathways to the genetic architecture of asthma.
rs8012643	Mean corpuscular hemoglobin	14	37223659	3e-43	0.029339	MIPOL1	32888493	Chen MH	Cell	486,823 European ancestry individuals	486,823 European ancestry individuals	GCST90002322	Trans-ethnic and Ancestry-Specific Blood-Cell Genetics in 746,667 Individuals from 5 Global Populations.
rs1520195	Mean corpuscular volume	3	184019094	4e-16	0.014741	ABCC5 - EEF1A1P8	32888493	Chen MH	Cell	544,127 European ancestry individuals	544,127 European ancestry individuals	GCST90002334	Trans-ethnic and Ancestry-Specific Blood-Cell Genetics in 746,667 Individuals from 5 Global Populations.
rs45521740	Body mass index	19	2245623	3e-14	0.0317	SF3A2	30239722	Pulit SL	Hum Mol Genet	806,834 European ancestry individuals	806,834 European ancestry individuals	GCST009004	Meta-analysis of genome-wide association studies for body fat distribution in 694,649 individuals of European ancestry.
rs945631	Height	1	92960610	1e-23	NA	DIPK1A	30595370	Kichaev G	Am J Hum Genet	approximately 458,000 European ancestry individuals	approximately 458,000 European ancestry individuals	GCST007841	Leveraging Polygenic Functional Enrichment to Improve GWAS Power.
rs3820028	Heel bone mineral density	1	23507994	4e-09	NA	E2F2	30595370	Kichaev G	Am J Hum Genet	approximately 446,000 European ancestry individuals	approximately 446,000 European ancestry individuals	GCST007066	Leveraging Polygenic Functional Enrichment to Improve GWAS Power.
rs10174238	Systemic seropositive rheumatic diseases (Systemic sclerosis or systemic lupus erythematosus or rheumatoid arthritis or idiopathic inflammatory myopathies)	2	191108308	3e-42	1.36986	STAT4	30573655	Acosta-Herrera M	Ann Rheum Dis	up to 4,595 European ancestry rheumatoid arthritis cases, up to 3,154 European ancestry systemic lupus erythematosus cases, up to 2,281 European ancestry systemic sclerosis cases, up to 1,674 European ancestry idiopathic inflammatory myopathy cases, 19,704 European ancestry controls	up to 4,595 European ancestry rheumatoid arthritis cases, up to 3,154 European ancestry systemic lupus erythematosus cases, up to 2,281 European ancestry systemic sclerosis cases, up to 1,674 European ancestry idiopathic inflammatory myopathy cases, 19,704 European ancestry controls	GCST007278	Genome-wide meta-analysis reveals shared new loci in systemic seropositive rheumatic diseases.
rs10203731	Height	2	25678644	2e-23	NA	DTNB - Y_RNA	30595370	Kichaev G	Am J Hum Genet	approximately 458,000 European ancestry individuals	approximately 458,000 European ancestry individuals	GCST007841	Leveraging Polygenic Functional Enrichment to Improve GWAS Power.
rs9578178	Male-pattern baldness	13	30495833	1e-09	0.019137	HMGB1	30573740	Yap CX	Nat Commun	205,327 European ancestry males	205,327 European ancestry males	GCST007020	Dissection of genetic variation and evidence for pleiotropy in male pattern baldness.
rs725613	Primary sclerosing cholangitis	16	11075826	4e-13	1.2	CLEC16A	27992413	Ji SG	Nat Genet	2,871 European ancestry cases, 12,019 European ancestry controls	2,871 European ancestry cases, 12,019 European ancestry controls	GCST004030	Genome-wide association study of primary sclerosing cholangitis identifies new risk loci and quantifies the genetic relationship with inflammatory bowel disease.
rs2857599	Itch intensity from mosquito bite adjusted by bite size	6	31594373	3e-08	0.0262207	NCR3 - UQCRHP1	28199695	Jones AV	Hum Mol Genet	69,057 European ancestry individuals without immune related conditions	69,057 European ancestry individuals without immune related conditions	GCST004865	GWAS of self-reported mosquito bite size, itch intensity and attractiveness to mosquitoes implicates immune-related predisposition loci.
rs17724508	Multiple sclerosis	16	79316307	6e-14	1.1431	RNA5SP431 - MAF	31604244	International Multiple Sclerosis Genetics Consortium	Science	14,802 European and unknown ancestry cases, 26,703 European and unknown ancestry controls	14,802 European and unknown ancestry cases, 26,703 European and unknown ancestry controls	GCST009597	Multiple sclerosis genomic map implicates peripheral immune cells and microglia in susceptibility.
rs11079788	Autoimmune thyroid disease	17	47743357	3e-15	1.09	TBX21	32581359	Saevarsdottir S	Nature	30,234 European ancestry cases, 724,172 European ancestry controls	30,234 European ancestry cases, 724,172 European ancestry controls	GCST010571	FLT3 stop mutation increases FLT3 ligand level and risk of autoimmune thyroid disease.
rs12762934	Platelet count	10	102600127	9e-22	0.018837	SUFU	32888493	Chen MH	Cell	542,827 European ancestry individuals	542,827 European ancestry individuals	GCST90002357	Trans-ethnic and Ancestry-Specific Blood-Cell Genetics in 746,667 Individuals from 5 Global Populations.
rs60153262	Asthma (adult onset)	5	132649143	7e-12	NA	TH2LCRR	31669095	Zhu Z	J Allergy Clin Immunol	33,418 European ancestry cases, 393,186 European ancestry controls	33,418 European ancestry cases, 393,186 European ancestry controls	GCST009842	Shared Genetic and Experimental Links between Obesity-Related Traits and Asthma Subtypes in UK Biobank.
rs1558067	Mean corpuscular volume	7	30463664	3e-09	0.0129642	NOD1	32888494	Vuckovic D	Cell	408,112 British individuals	408,112 British individuals	GCST90002392	The Polygenic and Monogenic Basis of Blood Traits and Diseases.
rs62117160	Eczema	19	44728895	4e-09	NA	CEACAM16-AS1 - BCL3	30595370	Kichaev G	Am J Hum Genet	approximately 459,000 European ancestry individuals	approximately 459,000 European ancestry individuals	GCST007075	Leveraging Polygenic Functional Enrichment to Improve GWAS Power.
rs9906189	Eczema	17	36549567	4e-09	NA	GGNBP2	30595370	Kichaev G	Am J Hum Genet	approximately 459,000 European ancestry individuals	approximately 459,000 European ancestry individuals	GCST007075	Leveraging Polygenic Functional Enrichment to Improve GWAS Power.
rs478839	Red blood cell count	10	87972113	6e-18	0.016544	PTEN - MED6P1	32888493	Chen MH	Cell	545,203 European ancestry individuals	545,203 European ancestry individuals	GCST90002363	Trans-ethnic and Ancestry-Specific Blood-Cell Genetics in 746,667 Individuals from 5 Global Populations.
rs7072793	Plasma t-tau levels	10	6064303	8e-06	NA	IL2RA - RPL32P23	28100725	Chen J	Neurology	463 European ancestry Alzheimer's disease cases, 163 European ancestry individuals with mild cognitive impairment, 151 European ancestry individuals	463 European ancestry Alzheimer's disease cases, 163 European ancestry individuals with mild cognitive impairment, 151 European ancestry individuals	GCST004092	Genome-wide association study identifies MAPT locus influencing human plasma tau levels.
rs12531540	Systemic lupus erythematosus	7	28123055	3e-08	1.15	JAZF1	26502338	Bentham J	Nat Genet	5,201 European ancestry cases, 9,066 European ancestry controls	5,201 European ancestry cases, 9,066 European ancestry controls	GCST003156	Genetic association analyses implicate aberrant regulation of innate and adaptive immunity genes in the pathogenesis of systemic lupus erythematosus.
rs9675999	Breast cancer	18	23047728	7e-07	0.0319	RBBP8 - CABLES1	29059683	Michailidou K	Nature	76,192 European ancestry cases, 63,082 European ancestry controls	76,192 European ancestry cases, 63,082 European ancestry controls	GCST004988	Association analysis identifies 65 new breast cancer risk loci.
rs12154498	Heel bone mineral density	7	92594204	4e-12	0.0324802	FAM133B - CDK6	28869591	Kemp JP	Nat Genet	76,067 European ancestry women, 66,420 European ancestry men	76,067 European ancestry women, 66,420 European ancestry men	GCST006288	Identification of 153 new loci associated with heel bone mineral density and functional involvement of GPC6 in osteoporosis.
rs2288004	Triglyceride levels	16	31042719	7e-13	0.0146939	STX4	32203549	Richardson TG	PLoS Med	441,016 European ancestry individuals	441,016 European ancestry individuals	GCST010244	Evaluating the relationship between circulating lipoprotein lipids and apolipoproteins with risk of coronary heart disease: A multivariable Mendelian randomisation analysis.
rs7158239	Mean corpuscular hemoglobin concentration	14	65053898	2e-11	0.02854	CHURC1-FNTB, MAX, FNTB	29403010	Kanai M	Nat Genet	108,728 Japanese ancestry individuals	108,728 Japanese ancestry individuals	GCST005992	Genetic analysis of quantitative traits in the Japanese population links cell types to complex human diseases.
rs9607721	Creatine kinase levels	22	40466116	3e-09	0.02615	MRTFA	29403010	Kanai M	Nat Genet	106,080 Japanese ancestry individuals	106,080 Japanese ancestry individuals	GCST006014	Genetic analysis of quantitative traits in the Japanese population links cell types to complex human diseases.
rs2070598	Appendicular lean mass	14	74894203	5e-10	0.0431227	DLST	31761296	Hernandez Cordero AI	Am J Hum Genet	181,862 European ancestry elderly individuals	181,862 European ancestry elderly individuals	GCST009577	Genome-wide Associations Reveal Human-Mouse Genetic Convergence and Modifiers of Myogenesis, CPNE1 and STC2.
rs8009347	C-reactive protein levels	14	73092858	5e-20	0.0190765	RBM25	31900758	Han X	Eur J Epidemiol	418,642 British ancestry individuals	418,642 British ancestry individuals	GCST009777	Using Mendelian randomization to evaluate the causal relationship between serum C-reactive protein levels and age-related macular degeneration.
rs62246406	HDL cholesterol	3	47056495	5e-10	0.0237	SETD2	30275531	Klarin D	Nat Genet	215,551 European ancestry individuals, 57,332 African American individuals, 24,743 Hispanic individuals	215,551 European ancestry individuals, 57,332 African American individuals, 24,743 Hispanic individuals	GCST006611	Genetics of blood lipids among ~300,000 multi-ethnic participants of the Million Veteran Program.
rs2759315	Body mass index	15	80717305	5e-11	0.018	ABHD17C	30108127	Hoffmann TJ	Genetics	315,347 European ancestry individuals, 8,322 Hispanic/Latino individuals, 7,290 East Asian ancestry individuals, 3,069 African American individuals, 459 South Asian ancestry individuals	315,347 European ancestry individuals, 8,322 Hispanic/Latino individuals, 7,290 East Asian ancestry individuals, 3,069 African American individuals, 459 South Asian ancestry individuals	GCST006368	A Large Multi-ethnic Genome-Wide Association Study of Adult Body Mass Index Identifies Novel Loci.
rs6777420	Alcohol consumption (drinks per week) (MTAG)	3	142284027	3e-08	0.0110558	GK5 - XRN1	30643251	Liu M	Nat Genet	up to 1,039,210 European ancestry individuals	up to 1,039,210 European ancestry individuals	GCST007472	Association studies of up to 1.2 million individuals yield new insights into the genetic etiology of tobacco and alcohol use.
rs4846724	Educational attainment (MTAG)	1	221794475	1e-11	0.0089	DUSP10 - LINC01705	30038396	Lee JJ	Nat Genet	1,311,438 European ancestry individuals	1,311,438 European ancestry individuals	GCST006571	Gene discovery and polygenic prediction from a genome-wide association study of educational attainment in 1.1 million individuals.
rs3790163	Heel bone mineral density	20	10667303	2e-47	0.0380113	JAG1	30048462	Kim SK	PLoS One	394,929 European ancestry individuals	394,929 European ancestry individuals	GCST006433	Identification of 613 new loci associated with heel bone mineral density and a polygenic risk score for bone mineral density, osteoporosis and fracture.
rs13105682	IDP dMRI TBSS ICVF Cerebral peduncle R	4	101781207	1e-18	0.193	BANK1	33875891	Smith SM	Nat Neurosci	20,859 British ancestry individuals	20,859 British ancestry individuals	GCST90004341	An expanded set of genome-wide association studies of brain imaging phenotypes in UK Biobank.
rs10777164	Serum levels of protein CASC4	12	89437817	4e-12	0.144086	POC1B	35078996	Gudjonsson A	Nat Commun	5,364 Icelandic ancestry individuals	5,364 Icelandic ancestry individuals	GCST90090331	A genome-wide association study of serum proteins reveals shared loci with common diseases.
rs492430	Schizophrenia	7	100715476	2e-08	1.07	POP7 - EPO	34380480	Liu J	BMC Med	26,271 East Asian ancestry cases, 40,071 East Asian ancestry controls, 33,640 European ancestry cases, 43,456 European ancestry controls	26,271 East Asian ancestry cases, 40,071 East Asian ancestry controls, 33,640 European ancestry cases, 43,456 European ancestry controls	GCST90053836	Genome-wide association study followed by trans-ancestry meta-analysis identify 17 new risk loci for schizophrenia.
rs72693791	Serum alkaline phosphatase levels	9	5816825	4e-12	0.0298	ERMP1	33462484	Sinnott-Armstrong N	Nat Genet	342,535 European ancestry individuals, 6,019 African ancestry individuals, 7,337 South Asian ancestry individuals	342,535 European ancestry individuals, 6,019 African ancestry individuals, 7,337 South Asian ancestry individuals	GCST90019494	Genetics of 35 blood and urine biomarkers in the UK Biobank.
rs2269905	Cortical thickness	17	44217094	1e-16	NA	ATXN7L3-AS1, UBTF	34560273	Shadrin AA	Neuroimage	35,657 White British ancestry individuals	35,657 White British ancestry individuals	GCST90091061	Vertex-wise multivariate genome-wide association study identifies 780 unique genetic loci associated with cortical morphology.
rs17703832	Cortical surface area	8	133093803	1e-17	NA	SLA, TG	34560273	Shadrin AA	Neuroimage	35,657 White British ancestry individuals	35,657 White British ancestry individuals	GCST90091060	Vertex-wise multivariate genome-wide association study identifies 780 unique genetic loci associated with cortical morphology.
rs1519602	Cortical thickness	2	196163068	4e-15	NA	STK17B	34560273	Shadrin AA	Neuroimage	35,657 White British ancestry individuals	35,657 White British ancestry individuals	GCST90091061	Vertex-wise multivariate genome-wide association study identifies 780 unique genetic loci associated with cortical morphology.
rs12629854	Thyroid peroxidase antibody levels in pregnancy	3	106201979	3e-08	0.0813	CBLB - Y_RNA	39266554	Wei Y	Nat Commun	60,225 Chinese ancestry individuals	60,225 Chinese ancestry individuals	GCST90435201	Genome-wide association studies of thyroid-related hormones, dysfunction, and autoimmunity among 85,421 Chinese pregnancies.
rs6139104	Low density lipoprotein cholesterol levels	20	409666	2e-11	0.0221474	RBCK1	32493714	Klimentidis YC	Diabetes	431,167 European ancestry individuals	431,167 European ancestry individuals	GCST90002412	Phenotypic and Genetic Characterization of Lower LDL-C and Increased Type-2 Diabetes Risk in the UK Biobank.
rs112725417	Sex hormone-binding globulin levels adjusted for BMI	12	112219557	4e-11	0.0166497	HECTD4	32042192	Ruth KS	Nat Med	368,929 European ancestry individuals	368,929 European ancestry individuals	GCST90012110	Using human genetics to understand the disease impacts of testosterone in men and women.
rs61117627	Respiratory disease (confirmatory factor analysis Factor 11)	6	137922563	3e-09	NA	TNFAIP3 - LINC02865	38965376	Carey CE	Nat Hum Behav	360,406 European ancestry individuals	360,406 European ancestry individuals	GCST90309345	Principled distillation of UK Biobank phenotype data reveals underlying structure in human variation.
rs12154733	A body shape index	7	20356925	1e-13	0.0256012	ITGB8	34021172	Christakoudi S	Sci Rep	219,872 British ancestry women	219,872 British ancestry women	GCST90020024	GWAS of allometric body-shape indices in UK Biobank identifies loci suggesting associations with morphogenesis, organogenesis, adrenal cell renewal and cancer.
rs10278679	Red blood cell count	7	44825465	7e-37	0.0281054	PPIA - H2AZ2	32888494	Vuckovic D	Cell	408,112 British individuals	408,112 British individuals	GCST90002403	The Polygenic and Monogenic Basis of Blood Traits and Diseases.
rs9989973	Type 2 diabetes mellitus adjusted for BMI or coronary artery disease (pleiotropy)	3	12457765	3e-10	NA	PPARG - TSEN2	38062574	Zhang W	Chin Med J (Engl)	50,409 European ancestry type 2 diabetes adjusted for BMI cases, 181,522 European ancestry coronary artery disease cases, 1,508,065 European ancestry controls	50,409 European ancestry type 2 diabetes adjusted for BMI cases, 181,522 European ancestry coronary artery disease cases, 1,508,065 European ancestry controls	GCST90451699	Bidirectional relationship between type 2 diabetes mellitus and coronary artery disease: Prospective cohort study and genetic analyses.
rs62175229	mean corpuscular volume (MCV, mean, inv-norm transformed)	2	159821048	2e-14	0.0232	LY75, LY75-CD302	39024449	Verma A	Science	114,862 African American or Afro-Caribbean individuals, 55,793 Hispanic or Latin American individuals, 5,950 East Asian ancestry individuals, 407,350 European ancestry individuals	114,862 African American or Afro-Caribbean individuals, 55,793 Hispanic or Latin American individuals, 5,950 East Asian ancestry individuals, 407,350 European ancestry individuals	GCST90479676	Diversity and scale: Genetic architecture of 2068 traits in the VA Million Veteran Program.
rs2823024	2-stearoyl-GPE (18:0) levels in elite athletes	21	15050558	3e-06	0.39351	ASMER1, NRIP1	31882771	Al-Khelaifi F	Sci Rep	490 individuals	490 individuals	GCST90133796	Metabolic GWAS of elite athletes reveals novel genetically-influenced metabolites associated with athletic performance.
rs3766400	Sphingomyelin (d18:2/18:1) levels in elite athletes	1	27882855	6e-06	0.327375	THEMIS2	31882771	Al-Khelaifi F	Sci Rep	490 individuals	490 individuals	GCST90134087	Metabolic GWAS of elite athletes reveals novel genetically-influenced metabolites associated with athletic performance.
rs11614295	Coronary artery disease or tissue plasminogen activator levels (pleiotropy)	12	112758928	3e-16	NA	RPH3A	35285134	Temprano-Sagrera G	J Thromb Haemost	172,122 European, South Asian or East Asian CAD cases, 566,864 European, South Asian or East Asian CAD controls, 26,929 European ancestry individuals with measurements	172,122 European, South Asian or East Asian CAD cases, 566,864 European, South Asian or East Asian CAD controls, 26,929 European ancestry individuals with measurements	GCST90129547	Multi-phenotype analyses of hemostatic traits with cardiovascular events reveal novel genetic associations.
rs461251	Prostate cancer	17	715922	6e-10	0.0745	VPS53	34594039	Sakaue S	Nat Genet	11,599 European ancestry cases, 199,628 European ancestry controls, 5,672 East Asian ancestry cases, 84,660 East Asian ancestry controls	11,599 European ancestry cases, 199,628 European ancestry controls, 5,672 East Asian ancestry cases, 84,660 East Asian ancestry controls	GCST90018905	A cross-population atlas of genetic associations for 220 human phenotypes.
rs2253427	SIRPA protein levels	20	1571784	7e-12	0.4868	SIRPB1	38565889	Kalnapenkis A	Sci Rep	496 European ancestry individuals	496 European ancestry individuals	GCST90277701	Genetic determinants of plasma protein levels in the Estonian population.
rs34946857	Multi-trait sex score	1	26902878	3e-19	NA	NUDC	37277458	Vosberg DE	Sci Rep	161,906 European ancestry females	161,906 European ancestry females	GCST90270116	The genetics of a "femaleness/maleness" score in cardiometabolic traits in the UK biobank.
rs7653372	Critical COVID-19 or osteoarthritis (MTAG)	3	45886267	1e-17	0.016	CCR9, LZTFL1	37398645	Huang YX	Front Immunol	314,870 European ancestry individuals with osteoarthritis data, 1,388,342 European ancestry individuals with critical COVID-19 data	314,870 European ancestry individuals with osteoarthritis data, 1,388,342 European ancestry individuals with critical COVID-19 data	GCST90292530	A shared genetic contribution to osteoarthritis and COVID-19 outcomes: a large-scale genome-wide cross-trait analysis.
rs17640347	Acute pancreatitis	5	148774375	7e-09	0.329332	HTR4 - ADRB2	36736436	Bourgault J	Gastroenterology	10,630 European ancestry cases, 844,679 European ancestry controls	10,630 European ancestry cases, 844,679 European ancestry controls	GCST90255375	Proteome-wide Mendelian randomization identifies causal links between blood proteins and acute pancreatitis.
rs1783210	Hip circumference adjusted for BMI	11	65456441	5e-09	0.0164542	FAUP4	34021172	Christakoudi S	Sci Rep	219,872 British ancestry women	219,872 British ancestry women	GCST90020028	GWAS of allometric body-shape indices in UK Biobank identifies loci suggesting associations with morphogenesis, organogenesis, adrenal cell renewal and cancer.
rs2836445	Retinal venular width	21	38500772	4e-09	0.432	ERG	36757925	Jiang X	PLoS Genet	52,798 European ancestry individuals	52,798 European ancestry individuals	GCST90270400	GWAS on retinal vasculometry phenotypes.
rs6979947	Whole-brain volume (12 month visit)(adjusted for APOE e4 dosage)	7	157213169	5e-07	0.1164	UBE3C	35086473	Lee B	BMC Genomics	1,576 European ancestry individuals	1,576 European ancestry individuals	GCST90103610	Genome-Wide association study of quantitative biomarkers identifies a novel locus for alzheimer's disease at 12p12.1.
rs74331768	Estimated glomerular filtration rate (creatinine)	16	2111792	1e-15	0.00358	PKD1	34272381	Stanzick KJ	Nat Commun	1,004,040 European ancestry individuals, 165,726 East Asian ancestry individuals, 13,842 African American individuals, 13,359 South Asian ancestry individuals, 4,961 Hispanic individuals, 2 individuals	1,004,040 European ancestry individuals, 165,726 East Asian ancestry individuals, 13,842 African American individuals, 13,359 South Asian ancestry individuals, 4,961 Hispanic individuals, 2 individuals	GCST90103633	Discovery and prioritization of variants and genes for kidney function in >1.2 million individuals.
rs73118830	Serum uric acid levels	7	50697251	4e-09	0.0196	GRB10	34594039	Sakaue S	Nat Genet	343,836 European ancestry individuals, 129,405 East Asian ancestry individuals	343,836 European ancestry individuals, 129,405 East Asian ancestry individuals	GCST90018977	A cross-population atlas of genetic associations for 220 human phenotypes.
rs4846335	Total lipid levels in small HDL	1	220859539	3e-08	0.037596	HLX-AS1	35213538	Richardson TG	PLoS Biol	115,082 European ancestry individuals	115,082 European ancestry individuals	GCST90092950	Characterising metabolomic signatures of lipid-modifying therapies through drug target mendelian randomisation.
rs8193004	Disks large homolog 3 levels	9	132990767	4e-17	0.114	GFI1B	34648354	Pietzner M	Science	10,708 European ancestry individuals	10,708 European ancestry individuals	GCST90247292	Mapping the proteo-genomic convergence of human diseases.
rs2568409	Height	8	129405378	3e-08	0.0045	CCDC26	36224396	Yengo L	Nature	5,314,291 European ancestry, Hispanic or Latin American, East Asian ancestry, African ancestry, South Asian ancestry individuals	5,314,291 European ancestry, Hispanic or Latin American, East Asian ancestry, African ancestry, South Asian ancestry individuals	GCST90245848	A saturated map of common genetic variants associated with human height.
rs1471816	Height	12	93751344	1e-300	0.0339	CRADD	36224396	Yengo L	Nature	5,314,291 European ancestry, Hispanic or Latin American, East Asian ancestry, African ancestry, South Asian ancestry individuals	5,314,291 European ancestry, Hispanic or Latin American, East Asian ancestry, African ancestry, South Asian ancestry individuals	GCST90245848	A saturated map of common genetic variants associated with human height.
rs2315008	Inflammatory bowel disease	20	63712604	9e-15	1.36	ZGPAT	18758464	Kugathasan S	Nat Genet	1,011 European ancestry cases, 4,250 European ancestry controls	1,011 European ancestry cases, 4,250 European ancestry controls	GCST000225	Loci on 20q13 and 21q22 are associated with pediatric-onset inflammatory bowel disease.
rs1490384	Height	6	126530014	1e-16	1.18	MIR588 - RNU6-200P	23563607	Berndt SI	Nat Genet	8,097 European ancestry tall individuals, 8,099 European ancestry short individuals	8,097 European ancestry tall individuals, 8,099 European ancestry short individuals	GCST001956	Genome-wide meta-analysis identifies 11 new loci for anthropometric traits and provides insights into genetic architecture.
rs1182188	Height	7	2830351	3e-09	0.07	GNA12	19343178	Soranzo N	PLoS Genet	12,611 European ancestry individuals	12,611 European ancestry individuals	GCST000372	Meta-analysis of genome-wide scans for human adult stature identifies novel Loci and associations with measures of skeletal frame size.
rs6586030	Inflammatory bowel disease	10	80494291	9e-16	1.115	TSPAN14	23128233	Jostins L	Nature	12,924 European ancestry cases, 21,442 European ancestry controls	12,924 European ancestry cases, 21,442 European ancestry controls	GCST001725	Host-microbe interactions have shaped the genetic architecture of inflammatory bowel disease.
rs2014998	Metabolite levels	2	216817238	9e-06	0.172511	TESHL	23823483	Rhee EP	Cell Metab	2,076 European ancestry individuals	2,076 European ancestry individuals	GCST009391	A genome-wide association study of the human metabolome in a community-based cohort.
rs643177	Inflammatory skin disease	6	137874556	9e-16	1.27	TNFAIP3	25574825	Baurecht H	Am J Hum Genet	2,079 European ancestry atopic dermatitis cases, 4,212 European ancestry psoriasis cases, 11,899 European ancestry controls	2,079 European ancestry atopic dermatitis cases, 4,212 European ancestry psoriasis cases, 11,899 European ancestry controls	GCST002740	Genome-wide comparative analysis of atopic dermatitis and psoriasis gives insight into opposing genetic mechanisms.
rs832187	Schizophrenia	3	63847374	1e-08	1.0627	C3orf49, THOC7	25056061	Ripke S	Nature	32,405 European ancestry cases, 42,221 European ancestry controls, 1,235 European ancestry cases and 1,235 European ancestry controls from 1235 parent-offspring trios, 1,836 East Asian ancestry cases, 3,383 East Asian ancestry controls	32,405 European ancestry cases, 42,221 European ancestry controls, 1,235 European ancestry cases and 1,235 European ancestry controls from 1235 parent-offspring trios, 1,836 East Asian ancestry cases, 3,383 East Asian ancestry controls	GCST002539	Biological insights from 108 schizophrenia-associated genetic loci.
rs9314614	IgA nephropathy	8	6840209	9e-10	1.135	GS1-24F4.2	26028593	Li M	Nat Commun	1,434 Han Chinese ancestry cases, 10,661 Han Chinese ancestry controls	1,434 Han Chinese ancestry cases, 10,661 Han Chinese ancestry controls	GCST002943	Identification of new susceptibility loci for IgA nephropathy in Han Chinese.
rs1032297	Post bronchodilator FEV1/FVC ratio	4	144513592	2e-16	0.016	GUSBP5 - KRT18P51	26634245	Lutz SM	BMC Genet	10,094 European ancestry current and former smoker individuals, 3,260 African American current and former smoker individuals, 178 current and former smoker individuals	10,094 European ancestry current and former smoker individuals, 3,260 African American current and former smoker individuals, 178 current and former smoker individuals	GCST003264	A genome-wide association study identifies risk loci for spirometric measures among smokers of European and African ancestry.
rs78565404	Plateletcrit	3	184372454	4e-74	0.155023	THPO	27863252	Astle WJ	Cell	164,339 European ancestry individuals	164,339 European ancestry individuals	GCST004607	The Allelic Landscape of Human Blood Cell Trait Variation and Links to Common Complex Disease.
rs738408	Hematocrit	22	43928850	6e-09	0.0249493	PNPLA3	27863252	Astle WJ	Cell	173,039 European ancestry individuals	173,039 European ancestry individuals	GCST004604	The Allelic Landscape of Human Blood Cell Trait Variation and Links to Common Complex Disease.
rs2143606	Granulocyte percentage of myeloid white cells	20	44209910	2e-20	0.0331658	OSER1	27863252	Astle WJ	Cell	169,545 European ancestry individuals	169,545 European ancestry individuals	GCST004608	The Allelic Landscape of Human Blood Cell Trait Variation and Links to Common Complex Disease.
rs305082	Granulocyte percentage of myeloid white cells	16	85903372	8e-131	0.115961	IRF8	27863252	Astle WJ	Cell	169,545 European ancestry individuals	169,545 European ancestry individuals	GCST004608	The Allelic Landscape of Human Blood Cell Trait Variation and Links to Common Complex Disease.
rs4686683	Systolic blood pressure	3	185589575	3e-06	0.183	SENP2	27841878	Hoffmann TJ	Nat Genet	295,529 European ancestry individuals, 8,231 Latino individuals, 3,058 African American individuals, 2,029 African British individuals, 7,701 East Asian ancestry individuals, 2,735 South Asian ancestry individuals, 1,979 mixed and unknown ancestry individuals	295,529 European ancestry individuals, 8,231 Latino individuals, 3,058 African American individuals, 2,029 African British individuals, 7,701 East Asian ancestry individuals, 2,735 South Asian ancestry individuals, 1,979 mixed and unknown ancestry individuals	GCST007099	Genome-wide association analyses using electronic health records identify new loci influencing blood pressure variation.
rs156355	Plateletcrit	20	1837967	4e-27	0.0413591	CKAP2LP1 - SIRPA	27863252	Astle WJ	Cell	164,339 European ancestry individuals	164,339 European ancestry individuals	GCST004607	The Allelic Landscape of Human Blood Cell Trait Variation and Links to Common Complex Disease.
rs7115703	Granulocyte percentage of myeloid white cells	11	306920	4e-52	0.0543283	IFITM2	27863252	Astle WJ	Cell	169,545 European ancestry individuals	169,545 European ancestry individuals	GCST004608	The Allelic Landscape of Human Blood Cell Trait Variation and Links to Common Complex Disease.
rs16930370	Height	12	3278531	3e-17	NA	TSPAN9	30595370	Kichaev G	Am J Hum Genet	approximately 458,000 European ancestry individuals	approximately 458,000 European ancestry individuals	GCST007841	Leveraging Polygenic Functional Enrichment to Improve GWAS Power.
rs559986	Waist-hip ratio	1	35375657	5e-08	NA	ZMYM4	30595370	Kichaev G	Am J Hum Genet	approximately 458,000 European ancestry individuals	approximately 458,000 European ancestry individuals	GCST007067	Leveraging Polygenic Functional Enrichment to Improve GWAS Power.
rs62011286	Height	15	63498926	1e-15	NA	LINC02568 - USP3	30595370	Kichaev G	Am J Hum Genet	approximately 458,000 European ancestry individuals	approximately 458,000 European ancestry individuals	GCST007841	Leveraging Polygenic Functional Enrichment to Improve GWAS Power.
rs11983987	Blood protein levels	7	76028532	7e-09	0.3609	STYXL1	27532455	Sun W	PLoS Genet	1,340 European ancestry individuals	1,340 European ancestry individuals	GCST010104	Common Genetic Polymorphisms Influence Blood Biomarker Measurements in COPD.
rs12023231	Waist circumference adjusted for body mass index	1	150017474	4e-11	NA	OTUD7B - RPL6P31	31669095	Zhu Z	J Allergy Clin Immunol	457,690 European ancestry individuals	457,690 European ancestry individuals	GCST009867	Shared Genetic and Experimental Links between Obesity-Related Traits and Asthma Subtypes in UK Biobank.
rs56408111	Mean corpuscular hemoglobin	19	19682736	1e-07	NA	ZNF101	30595370	Kichaev G	Am J Hum Genet	approximately 443,000 European ancestry individuals	approximately 443,000 European ancestry individuals	GCST007068	Leveraging Polygenic Functional Enrichment to Improve GWAS Power.
rs301819	Asthma	1	8441726	2e-15	NA	RERE	32296059	Han Y	Nat Commun	84,492 European ancestry cases, 2,149 African American cases, 606 Hispanic cases, 1,239 Japanese ancestry cases, 437,036 European ancestry controls, 6,055 African American controls, 792 Hispanic controls, 3,976 Japanese ancestry controls	84,492 European ancestry cases, 2,149 African American cases, 606 Hispanic cases, 1,239 Japanese ancestry cases, 437,036 European ancestry controls, 6,055 African American controls, 792 Hispanic controls, 3,976 Japanese ancestry controls	GCST010043	Genome-wide analysis highlights contribution of immune system pathways to the genetic architecture of asthma.
rs3777755	Asthma	6	12159466	5e-09	NA	HIVEP1	32296059	Han Y	Nat Commun	84,492 European ancestry cases, 2,149 African American cases, 606 Hispanic cases, 1,239 Japanese ancestry cases, 437,036 European ancestry controls, 6,055 African American controls, 792 Hispanic controls, 3,976 Japanese ancestry controls	84,492 European ancestry cases, 2,149 African American cases, 606 Hispanic cases, 1,239 Japanese ancestry cases, 437,036 European ancestry controls, 6,055 African American controls, 792 Hispanic controls, 3,976 Japanese ancestry controls	GCST010043	Genome-wide analysis highlights contribution of immune system pathways to the genetic architecture of asthma.
rs12215332	Mean corpuscular hemoglobin	6	121467826	7e-20	0.021778	RNU4-35P - RNU4-76P	32888493	Chen MH	Cell	486,823 European ancestry individuals	486,823 European ancestry individuals	GCST90002322	Trans-ethnic and Ancestry-Specific Blood-Cell Genetics in 746,667 Individuals from 5 Global Populations.
rs12658947	Adverse response to inhaled corticosteroid treatment x age interaction in asthma	5	58256637	2e-07	2.69	LINC02101	32119686	Dahlin A	PLoS One	407 European ancestry cases, 376 European ancestry controls	407 European ancestry cases, 376 European ancestry controls	GCST010039	Genome-wide interaction study reveals age-dependent determinants of responsiveness to inhaled corticosteroids in individuals with asthma.
rs113135335	Waist-to-hip ratio adjusted for BMI	2	111130177	2e-13	NA	BCL2L11, MIR4435-2HG	31669095	Zhu Z	J Allergy Clin Immunol	457,690 European ancestry individuals	457,690 European ancestry individuals	GCST009858	Shared Genetic and Experimental Links between Obesity-Related Traits and Asthma Subtypes in UK Biobank.
rs160045	Mean corpuscular hemoglobin	5	88845125	1e-35	NA	MEF2C	32888493	Chen MH	Cell	630,125 African American or Afro-Caribbean, African ancestry, European ancestry, East Asian ancestry, Hispanic or Latin American and South Asian ancestry individuals	630,125 African American or Afro-Caribbean, African ancestry, European ancestry, East Asian ancestry, Hispanic or Latin American and South Asian ancestry individuals	GCST90002326	Trans-ethnic and Ancestry-Specific Blood-Cell Genetics in 746,667 Individuals from 5 Global Populations.
rs5745297	Red blood cell count	5	10680885	2e-08	NA	DAP	30595370	Kichaev G	Am J Hum Genet	approximately 445,000 European ancestry individuals	approximately 445,000 European ancestry individuals	GCST007069	Leveraging Polygenic Functional Enrichment to Improve GWAS Power.
rs9402685	Mean corpuscular hemoglobin concentration	6	135098550	0	NA	HBS1L	32888493	Chen MH	Cell	642,173 African American or Afro-Caribbean, African ancestry, European ancestry, East Asian ancestry, Hispanic or Latin American and South Asian ancestry individuals	642,173 African American or Afro-Caribbean, African ancestry, European ancestry, East Asian ancestry, Hispanic or Latin American and South Asian ancestry individuals	GCST90002332	Trans-ethnic and Ancestry-Specific Blood-Cell Genetics in 746,667 Individuals from 5 Global Populations.
rs13337177	Predicted visceral adipose tissue	16	2125322	2e-12	0.0228238	PKD1	31501611	Karlsson T	Nat Med	325,153 British ancestry individuals	325,153 British ancestry individuals	GCST008744	Contribution of genetics to visceral adiposity and its relation to cardiovascular and metabolic disease.
rs12923918	Heel bone mineral density	16	24833082	6e-09	NA	TNRC6A - SLC5A11	30595370	Kichaev G	Am J Hum Genet	approximately 446,000 European ancestry individuals	approximately 446,000 European ancestry individuals	GCST007066	Leveraging Polygenic Functional Enrichment to Improve GWAS Power.
rs11716015	Joint damage in rheumatoid arthritis	3	169602270	3e-06	NA	MECOM	31596875	Traylor M	PLoS One	2,527 European ancestry individuals, 196 African ancestry individuals, 52 individuals	2,527 European ancestry individuals, 196 African ancestry individuals, 52 individuals	GCST008992	Genetic associations with radiological damage in rheumatoid arthritis: Meta-analysis of seven genome-wide association studies of 2,775 cases.
rs58926146	Male-pattern baldness	2	60413368	7e-12	0.023586	MIR4432HG	30573740	Yap CX	Nat Commun	205,327 European ancestry males	205,327 European ancestry males	GCST007020	Dissection of genetic variation and evidence for pleiotropy in male pattern baldness.
rs6915310	Male-pattern baldness	6	16757771	5e-20	0.0375681	ATXN1	30573740	Yap CX	Nat Commun	205,327 European ancestry males	205,327 European ancestry males	GCST007020	Dissection of genetic variation and evidence for pleiotropy in male pattern baldness.
rs62059189	Multiple sclerosis	17	7272525	3e-06	1.07527	Y_RNA - SLC2A4	31604244	International Multiple Sclerosis Genetics Consortium	Science	14,802 European and unknown ancestry cases, 26,703 European and unknown ancestry controls	14,802 European and unknown ancestry cases, 26,703 European and unknown ancestry controls	GCST009597	Multiple sclerosis genomic map implicates peripheral immune cells and microglia in susceptibility.
rs62329718	Mean corpuscular hemoglobin	4	104836902	3e-15	NA	CXXC4-AS1 - RPL6P14	30595370	Kichaev G	Am J Hum Genet	approximately 443,000 European ancestry individuals	approximately 443,000 European ancestry individuals	GCST007068	Leveraging Polygenic Functional Enrichment to Improve GWAS Power.
rs12885878	Mean corpuscular volume	14	103541218	5e-32	0.026594	TRMT61A - RNU7-160P	32888493	Chen MH	Cell	544,127 European ancestry individuals	544,127 European ancestry individuals	GCST90002334	Trans-ethnic and Ancestry-Specific Blood-Cell Genetics in 746,667 Individuals from 5 Global Populations.
rs7577690	Schizophrenia (MTAG)	2	219180313	5e-08	NA	RETREG2	32606422	Wu Y	Transl Psychiatry	65,967 individuals	65,967 individuals	GCST010645	Multi-trait analysis for genome-wide association study of five psychiatric disorders.
rs12000252	Platelet count	9	70423047	7e-26	0.019714	KLF9 - TRPM3	32888493	Chen MH	Cell	542,827 European ancestry individuals	542,827 European ancestry individuals	GCST90002357	Trans-ethnic and Ancestry-Specific Blood-Cell Genetics in 746,667 Individuals from 5 Global Populations.
rs10992394	Platelet count	9	92671548	1e-16	0.017993	IPPK - RPL21P86	32888493	Chen MH	Cell	542,827 European ancestry individuals	542,827 European ancestry individuals	GCST90002357	Trans-ethnic and Ancestry-Specific Blood-Cell Genetics in 746,667 Individuals from 5 Global Populations.
rs147176253	Heel bone mineral density	16	3896484	4e-11	0.02543	CREBBP - LINC02861	30598549	Morris JA	Nat Genet	426,824 British ancestry individuals	426,824 British ancestry individuals	GCST006979	An atlas of genetic influences on osteoporosis in humans and mice.
rs6722159	Triglyceride levels	2	160483601	3e-08	0.0109794	RBMS1	32203549	Richardson TG	PLoS Med	441,016 European ancestry individuals	441,016 European ancestry individuals	GCST010244	Evaluating the relationship between circulating lipoprotein lipids and apolipoproteins with risk of coronary heart disease: A multivariable Mendelian randomisation analysis.
rs556429	Total body bone mineral density	13	36912884	1e-08	0.0386	SMAD9	29304378	Medina-Gomez C	Am J Hum Genet	56,284 European ancestry individuals, up to 1,333 African American individuals, up to 9,328 admixed individuals	56,284 European ancestry individuals, up to 1,333 African American individuals, up to 9,328 admixed individuals	GCST005348	Life-Course Genome-wide Association Study Meta-analysis of Total Body BMD and Assessment of Age-Specific Effects.
rs75421923	Protein quantitative trait loci (liver)	17	40196126	2e-08	0.04788	RAPGEFL1 - WIPF2	32778093	He B	BMC Biol	172 European ancestry individuals, 29 Black individuals, 86 individuals	172 European ancestry individuals, 29 Black individuals, 86 individuals	GCST011427	Genome-wide pQTL analysis of protein expression regulatory networks in the human liver.
rs11260027	CD209/CLEC4G protein level ratio	19	7739930	0	0.306899	CLEC4G - CD209	38412862	Suhre K	Cell Genom	43,509 European ancestry individuals	43,509 European ancestry individuals	GCST90313750	Genetic associations with ratios between protein levels detect new pQTLs and reveal protein-protein interactions.
rs11668882	Phosphatidate(44:6)_[M+OAc]1-/Phosphatidylglycerol(43:6)_[M-H]1- levels	19	54171328	1e-28	0.0856	TMC4	34503513	Harshfield EL	BMC Med	5,662 Pakistani ancestry individuals	5,662 Pakistani ancestry individuals	GCST90060917	Genome-wide analysis of blood lipid metabolites in over 5000 South Asians reveals biological insights at cardiometabolic disease loci.
rs56336338	Gout	17	29318240	3e-08	1.04854	NUFIP2 - RPL35AP35	39406924	Major TJ	Nat Genet	77,627 European ancestry cases, 933,894 European ancestry controls	77,627 European ancestry cases, 933,894 European ancestry controls	GCST90455677	A genome-wide association analysis reveals new pathogenic pathways in gout.
rs1041528	Waist circumference adjusted for body mass index	6	35222343	1e-08	0.0242487	SCUBE3, SCUBE3-AS1	34021172	Christakoudi S	Sci Rep	186,825 British ancestry men	186,825 British ancestry men	GCST012226	GWAS of allometric body-shape indices in UK Biobank identifies loci suggesting associations with morphogenesis, organogenesis, adrenal cell renewal and cancer.
rs12744291	Alzheimer's disease or gastroesophageal reflux disease	1	65897288	3e-06	NA	PDE4B	35851147	Adewuyi EO	Commun Biol	71,880 European ancestry Alzheimer's disease or AD-by-proxy cases, 71,522 European ancestry GERD cases, up to 644,457 European ancestry controls	71,880 European ancestry Alzheimer's disease or AD-by-proxy cases, 71,522 European ancestry GERD cases, up to 644,457 European ancestry controls	GCST90134603	A large-scale genome-wide cross-trait analysis reveals shared genetic architecture between Alzheimer's disease and gastrointestinal tract disorders.
rs2137537	Aspartate aminotransferase levels	12	70719307	4e-27	10.8	PTPRR	33547301	Chen VL	Nat Commun	389,565 European ancestry individuals	389,565 European ancestry individuals	GCST90011899	Genome-wide association study of serum liver enzymes implicates diverse metabolic and liver pathology.
rs7969023	Total cholesterol levels	12	26651016	4e-10	NA	ITPR2	34887591	Graham SE	Nature	40,963 South Asian ancestry individuals, 48,057 Hispanic individuals, 99,432 Admixed African or African ancestry individuals, 146,492 East Asian ancestry individuals, 1,320,016 European ancestry individuals	40,963 South Asian ancestry individuals, 48,057 Hispanic individuals, 99,432 Admixed African or African ancestry individuals, 146,492 East Asian ancestry individuals, 1,320,016 European ancestry individuals	GCST90239673	The power of genetic diversity in genome-wide association studies of lipids.
rs72694391	Cholesteryl ester levels in small VLDL	14	24404820	2e-08	0.0230961	NYNRIN	35213538	Richardson TG	PLoS Biol	115,082 European ancestry individuals	115,082 European ancestry individuals	GCST90092970	Characterising metabolomic signatures of lipid-modifying therapies through drug target mendelian randomisation.
rs2236658	mean corpuscular hemoglobin concentration (MCHC, maximum, inv-norm transformed)	11	123062424	5e-38	0.05602	HSPA8	39024449	Verma A	Science	114,857 African American or Afro-Caribbean individuals, 55,793 Hispanic or Latin American individuals, 5,943 East Asian ancestry individuals, 407,343 European ancestry individuals	114,857 African American or Afro-Caribbean individuals, 55,793 Hispanic or Latin American individuals, 5,943 East Asian ancestry individuals, 407,343 European ancestry individuals	GCST90479669	Diversity and scale: Genetic architecture of 2068 traits in the VA Million Veteran Program.
rs55741258	Blood urea nitrogen levels	16	72078581	1e-08	0.015	HPR - TXNL4B	34594039	Sakaue S	Nat Genet	344,052 European ancestry individuals, 148,767 East Asian ancestry individuals	344,052 European ancestry individuals, 148,767 East Asian ancestry individuals	GCST90018948	A cross-population atlas of genetic associations for 220 human phenotypes.
rs11070802	Aspartate aminotransferase levels	15	50654618	3e-15	0.0157	TRPM7	34594039	Sakaue S	Nat Genet	342,990 European ancestry individuals, 150,068 East Asian ancestry individuals	342,990 European ancestry individuals, 150,068 East Asian ancestry individuals	GCST90018944	A cross-population atlas of genetic associations for 220 human phenotypes.
rs9273453	FEV1 or irritable bowel syndrome (pleiotropy)	6	32660035	4e-14	NA	HLA-DQB1-AS1, HLA-DQB1	38102678	Jiang M	Respir Res	400,102 European ancestry individuals with FEV1 measurement, 61,516 European ancestry IBS cases, 709,884 European ancestry controls	400,102 European ancestry individuals with FEV1 measurement, 61,516 European ancestry IBS cases, 709,884 European ancestry controls	GCST90454174	Genetic and observational associations of lung function with gastrointestinal tract diseases: pleiotropic and mendelian randomization analysis.
rs722086	Systemic lupus erythematosus (MTAG)	6	25428726	7e-15	0.077	CARMIL1, CMAHP	36750564	Khunsriraksakul C	Nat Commun	at least 5,877 East Asian ancestry cases, at least 188,588 East Asian ancestry controls, at least 14,355 European ancestry cases, at least 505,956 European ancestry controls, at least 1,393 admixed American ancestry cases, at least 2,327 admixed American ancestry controls (MTAG boosted by autoimmune diseases samples)	at least 5,877 East Asian ancestry cases, at least 188,588 East Asian ancestry controls, at least 14,355 European ancestry cases, at least 505,956 European ancestry controls, at least 1,393 admixed American ancestry cases, at least 2,327 admixed American ancestry controls (MTAG boosted by autoimmune diseases samples)	GCST90270940	Multi-ancestry and multi-trait genome-wide association meta-analyses inform clinical risk prediction for systemic lupus erythematosus.
rs1707304	Hearing difficulty and hearing difficulty with background noise	1	46132597	3e-08	0.05	PIK3R3, P3R3URF-PIK3R3	36788145	Cornejo-Sanchez DM	Eur J Hum Genet	38,410 European ancestry cases, 96,601 European ancestry controls	38,410 European ancestry cases, 96,601 European ancestry controls	GCST90245776	Rare-variant association analysis reveals known and new age-related hearing loss genes.
rs984932	Multi-trait sex score	6	142481900	5e-09	NA	ADGRG6 - HIVEP2	37277458	Vosberg DE	Sci Rep	161,906 European ancestry females	161,906 European ancestry females	GCST90270116	The genetics of a "femaleness/maleness" score in cardiometabolic traits in the UK biobank.
rs702484	Alanine aminotransferase levels	7	6392302	6e-12	0.0029	RAC1	38632349	Ghouse J	Nat Genet	1,010,710 European ancestry individuals	1,010,710 European ancestry individuals	GCST90428729	Integrative common and rare variant analyses provide insights into the genetic architecture of liver cirrhosis.
rs7595381	Smoking initiation	2	127718910	4e-15	0.00799	WDR33	36477530	Saunders GRB	Nature	2,669,029 European ancestry individuals	2,669,029 European ancestry individuals	GCST90243968	Genetic diversity fuels gene discovery for tobacco and alcohol use.
rs10106829	HDL cholesterol levels	8	9327118	6e-10	0.0976	PPP1R3B-DT	36333282	Kim YJ	Nat Commun	288,127 East Asian ancestry individuals	288,127 East Asian ancestry individuals	GCST90244005	The contribution of common and rare genetic variants to variation in metabolic traits in 288,137 East Asians.
rs144215737	C-reactive protein levels (MTAG)	1	65712381	1e-31	0.09979	LEPR - RN7SL854P	36376304	Koskeridis F	Nat Commun	575,531 European ancestry individuals	575,531 European ancestry individuals	GCST90179146	Pleiotropic genetic architecture and novel loci for C-reactive protein levels.
rs11264322	Serum 25-Hydroxyvitamin D levels (conditioned on BMI)	1	155115457	7e-07	0.01	EFNA3 - Y_RNA	32242144	Revez JA	Nat Commun	417,580 European ancestry individuals	417,580 European ancestry individuals	GCST90000616	Genome-wide association study identifies 143 loci associated with 25 hydroxyvitamin D concentration.
rs6911639	Rheumatoid arthritis or irritable bowel disease	6	33010401	8e-09	NA	HLA-DOA - HLA-DPA1	37377963	Wen YP	Front Immunol	5,082 European ancestry rheumatoid arthritis cases, 3,878 European ancestry inflammatory bowel disease cases, at least 447,182 European ancestry controls	5,082 European ancestry rheumatoid arthritis cases, 3,878 European ancestry inflammatory bowel disease cases, at least 447,182 European ancestry controls	GCST90302862	Identifying shared genetic loci and common risk genes of rheumatoid arthritis associated with three autoimmune diseases based on large-scale cross-trait genome-wide association studies.
rs12241216	RBC levels of Hypoxanthine (uM)	10	69483189	1e-09	0.58	TSPAN15	36395887	Moore A	J Biol Chem	243 individuals	243 individuals	GCST90267489	Genome-wide metabolite quantitative trait loci analysis (mQTL) in red blood cells from volunteer blood donors.
rs2282611	heart rate (HR, minimum, inv-normal transformed)	11	76443802	2e-17	0.02593	EMSY-DT	39024449	Verma A	Science	119,330 African American or Afro-Caribbean individuals, 57,986 Hispanic or Latin American individuals, 6,419 East Asian ancestry individuals, 425,720 European ancestry individuals	119,330 African American or Afro-Caribbean individuals, 57,986 Hispanic or Latin American individuals, 6,419 East Asian ancestry individuals, 425,720 European ancestry individuals	GCST90480667	Diversity and scale: Genetic architecture of 2068 traits in the VA Million Veteran Program.
rs7256735	Height	19	2169122	1e-67	0.0182	DOT1L	36224396	Yengo L	Nature	5,314,291 European ancestry, Hispanic or Latin American, East Asian ancestry, African ancestry, South Asian ancestry individuals	5,314,291 European ancestry, Hispanic or Latin American, East Asian ancestry, African ancestry, South Asian ancestry individuals	GCST90245848	A saturated map of common genetic variants associated with human height.
rs35161364	Height	10	87870667	1e-19	0.0149	PTEN	36224396	Yengo L	Nature	5,314,291 European ancestry, Hispanic or Latin American, East Asian ancestry, African ancestry, South Asian ancestry individuals	5,314,291 European ancestry, Hispanic or Latin American, East Asian ancestry, African ancestry, South Asian ancestry individuals	GCST90245848	A saturated map of common genetic variants associated with human height.
rs11611855	Mean corpuscular hemoglobin	12	6393094	1e-12	0.013955	LTBR - RPL31P10	32888493	Chen MH	Cell	486,823 European ancestry individuals	486,823 European ancestry individuals	GCST90002322	Trans-ethnic and Ancestry-Specific Blood-Cell Genetics in 746,667 Individuals from 5 Global Populations.
rs10208293	Asthma (time to onset)	2	102349850	3e-08	1.14	IL1RL1, IL18R1	27130862	Sarnowski C	J Allergy Clin Immunol	5,462 European ancestry cases, 8,424 European ancestry controls	5,462 European ancestry cases, 8,424 European ancestry controls	GCST008838	Identification of a new locus at 16q12 associated with time to asthma onset.
rs17007417	Nonalcoholic steatohepatitis-derived hepatocellular carcinoma	2	71808541	5e-07	2.74	DYSF - RPS20P10	29385134	Kawaguchi T	PLoS One	58 Japanese ancestry cases, 7,672 Japanese ancestry controls	58 Japanese ancestry cases, 7,672 Japanese ancestry controls	GCST005309	Risk estimation model for nonalcoholic fatty liver disease in the Japanese using multiple genetic markers.
rs12925411	Personality traits or cognitive traits (multivariate analysis)	16	27457880	3e-08	NA	IL21R-AS1 - GTF3C1	37365406	Hindley G	Nat Hum Behav	337,125 British ancestry individuals	337,125 British ancestry individuals	GCST90270074	Multivariate genetic analysis of personality and cognitive traits reveals abundant pleiotropy.
rs3024971	Asthma (childhood onset)	12	57099944	4e-15	NA	STAT6	31669095	Zhu Z	J Allergy Clin Immunol	13,435 European ancestry cases, 393,186 European ancestry controls	13,435 European ancestry cases, 393,186 European ancestry controls	GCST009841	Shared Genetic and Experimental Links between Obesity-Related Traits and Asthma Subtypes in UK Biobank.
rs10065018	Platelet count	5	180600277	3e-13	0.018105	SCGB3A1 - FLT4	32888493	Chen MH	Cell	542,827 European ancestry individuals	542,827 European ancestry individuals	GCST90002357	Trans-ethnic and Ancestry-Specific Blood-Cell Genetics in 746,667 Individuals from 5 Global Populations.
